# Supplementary material
Source: PubMed Central journal article supplement (PMC1892191)
Supplement: NIHMS18195-supplement-supp.pdf [file NIHMS18195-supplement-supp.pdf]

**Table S1: List of 702 genes up-regulated in MH, ML and SN patients.**

These genes were extracted by SAM with a False Discovery Rate&lt;5% and a FC&gt;1,8.

| Name                                                      | GenBank  | MH   |      | ML   |      | SN   |      |
|-----------------------------------------------------------|----------|------|------|------|------|------|------|
|                                                           |          | FC   | FDR  | FC   | FDR  | FC   | FDR  |
| Interferon-induced protein 44                             | AA034349 | 1,88 | 0,51 |      |      |      |      |
| Lectin, mannose-binding, 1                                | AA057813 | 1,95 | 2,32 | 2,11 | 2,89 |      |      |
| Transcribed locus                                         | AA182818 |      |      | 2,37 | 0,59 | 2,06 | 0,77 |
| ATP/GTP-binding protein                                   | AA188236 |      |      | 2,19 | 1,09 | 2,16 | 0,66 |
| Chloride intracellular channel 1                          | AA291390 |      |      | 1,98 | 2,30 | 1,95 | 2,44 |
| RAD52 homolog                                             | AA306663 |      |      | 2,10 | 1,09 | 2,11 | 0,49 |
| Formin binding protein 4                                  | AA424932 |      |      | 2,05 | 1,76 | 1,99 | 0,66 |
| Myxovirus resistance 1 (interferon-inducible protein p78) | AA477235 | 1,94 | 0,51 |      |      |      |      |
| PHD finger protein 11                                     | AA502343 |      |      | 1,87 | 2,89 |      |      |
| Angel homolog 1                                           | AA527389 |      |      | 2,13 | 1,98 | 1,98 | 0,66 |
| Interleukin 1, beta                                       | AA577318 |      |      | 2,38 | 0,59 | 1,84 | 1,42 |
| Proteasome 26S subunit, non-ATPase, 4                     | AA604027 |      |      | 2,18 | 1,09 | 1,88 | 0,91 |
| Proteasome 26S subunit, ATPase, 3                         | AA604188 |      |      | 1,88 | 2,30 |      |      |
| Zinc finger protein 220                                   | AA777633 |      |      | 1,96 | 1,09 | 2,04 | 0,49 |
| Oxidative-stress responsive 1                             | AA780605 |      |      |      |      | 1,89 | 0,66 |
| B-cell translocation gene 1, anti-proliferative           | AA807633 |      |      | 2,54 | 0,59 | 1,98 | 0,66 |
| Delta/YY1/NF-E1/UCRBP transcription factor                | AAA40477 |      |      | 12,0 | 2,97 |      |      |
| Carbohydrate-binding recepto                              | AAA40892 |      |      |      |      | 3,18 | 2,86 |
| Sob protein (zinc finger protein)                         | AAC47282 | 1,99 | 1,40 |      |      |      |      |
| Zinc finger protein 23                                    | AAH07256 |      |      | 1,99 | 2,30 |      |      |
| Embryonic poly(A) binding proteir                         | AAK29408 |      |      | 2,20 | 1,09 |      |      |
| Kinesin family member 3B                                  | AB002357 |      |      | 1,91 | 1,98 |      |      |
| Catenin (cadherin-associated protein), delta 1            | AB002382 | 1,92 | 2,32 |      |      | 1,93 | 0,66 |
| Signal-induced proliferation-associated gene 7            | AB005666 |      |      | 2,07 | 1,09 | 1,96 | 0,66 |
| Aquaporin 7                                               | AB006190 |      |      |      |      | 2,64 | 4,96 |
| Cytoplasmic linker 2                                      | AB006629 | 2,12 | 0,51 |      |      |      |      |
| Suppressor of cytokine signaling 3                        | AB006967 |      |      | 2,16 | 1,09 |      |      |
| KIAA0427 protein                                          | AB007887 |      |      |      |      | 1,81 | 1,08 |
| Low density lipoprotein receptor-related protein 3        | AB009462 |      |      | 2,81 | 0,59 | 1,87 | 0,77 |
| Hedgehog gene                                             | AB010994 |      |      | 1,81 | 3,45 |      |      |
| KIAA0574 protein                                          | AB011146 |      |      |      |      | 2,01 | 0,66 |
| KIAA0631 protein                                          | AB014531 |      |      |      |      | 1,95 | 0,66 |
| KIAA0664 protein                                          | AB014564 |      |      |      |      | 1,90 | 0,77 |
| F-box and leucine-rich repeat protein 7                   | AB020647 | 1,91 | 1,27 |      |      |      |      |
| Pleckstrin homology domain containing, family M member 2  | AB020649 |      |      |      |      | 1,84 | 1,43 |
| Chromosome 22 open reading frame 9                        | AB023147 |      |      |      |      | 1,93 | 0,66 |
| Fibronectin type III domain containing 3                  | AB023187 | 2,02 | 1,27 |      |      |      |      |
| Heat shock 70kDa protein 4                                | AB023420 | 2,21 | 2,49 |      |      | 2,05 | 0,49 |
| KIAA1059 protein                                          | AB028982 |      |      | 2,08 | 2,97 |      |      |
| ErbB2 interacting protein                                 | AB033051 |      |      |      |      | 1,85 | 1,08 |
| Ribonucleotide reductase M2 B (TP53 inducible)            | AB036063 | 2,21 | 0,51 |      |      |      |      |
| Nucleolar protein family A, member 3                      | AB043104 |      |      | 1,83 | 3,79 | 2,01 | 0,91 |
| Disabled homolog 1 (DAB1)                                 | AB055282 |      |      | 1,96 | 1,09 | 1,81 | 1,08 |
| Possible morphine-related gene                            | AB056657 |      |      |      |      | 1,80 | 1,42 |
| Chromosome 16                                             | AC004232 |      |      | 1,81 | 2,66 | 1,82 | 1,42 |
| Copper chaperone for superoxide dismutase                 | AF002210 |      |      | 2,11 | 1,09 | 1,87 | 1,42 |
| Homeodomain-interacting protein kinase 3                  | AF004849 |      |      | 1,87 | 2,97 | 1,83 | 1,42 |
| Claudin 3 (CLDN3) gene                                    | AF007189 |      |      |      |      | 1,97 | 1,42 |
| Protein kinase CK2 catalytic subunit alpha gene           | AF011920 |      |      |      |      | 1,85 | 1,23 |
| TYRO protein tyrosine kinase binding protein (DAP12)      | AF019562 | 1,89 | 2,32 |      |      | 2,00 | 0,66 |
| Meltrin-L precursor (ADAM12)                              | AF023476 |      |      |      |      | 2,04 | 0,66 |
| Vascular endothelial growth factor (VEGF)                 | AF024710 |      |      | 4,03 | 2,97 |      |      |
| Interferon-inducible protein (AIM2)                       | AF024714 | 2,09 | 1,27 | 2,44 | 0,59 | 1,99 | 0,66 |
| Histone acetyltransferase (GCN5)                          | AF029777 |      |      |      |      | 1,91 | 0,66 |
| Similar to 26S proteasome subunit p45                     | AF035309 |      |      | 2,04 | 1,09 | 2,25 | 0,49 |
| Peptidylprolyl isomerase E (cyclophilin E)                | AF042386 |      |      | 1,90 | 2,30 |      |      |
| Chemokine (C-X-C motif) ligand 13 (CXCL13)                | AF044197 | 2,82 | 0,51 | 1,97 | 2,66 | 1,95 | 0,66 |
| SEC6-like 1                                               | AF055006 |      |      | 1,95 | 1,98 |      |      |
| Hypothetical protein LOC151162                            | AF055029 |      |      | 1,94 | 1,76 |      |      |
| V-maf musculoaponeurotic fibrosarcoma oncogene homolog    | AF055376 |      |      |      |      | 1,87 | 0,91 |

|                                                               |          |      |      |      |      |      |      |
|---------------------------------------------------------------|----------|------|------|------|------|------|------|
| Interferon gamma receptor 1                                   | AF056979 |      | 2,12 | 1,09 |      |      |      |
| Zinc finger protein 145                                       | AF060568 |      | 1,90 | 4,43 |      |      |      |
| Zinc finger protein 145                                       | AF060568 |      | 1,93 | 1,98 |      |      |      |
| Heterogeneous nuclear ribonucleoprotein M                     | AF061832 |      | 2,14 | 1,09 | 1,94 | 0,77 |      |
| Ig superfamily, member 4B                                     | AF062733 | 1,83 | 4,43 |      |      |      |      |
| Cullin 3                                                      | AF064087 |      | 1,86 | 1,98 | 2,08 | 0,49 |      |
| SNC73 protein (Ig H alpha 1)                                  | AF067420 | 2,03 | 2,32 |      |      | 2,19 | 0,49 |
| Mitochondrial 28S ribosomal protein S22                       | AF070618 | 1,81 | 2,49 |      |      |      |      |
| Regulatory factor X-associated ankyrin-containing protein     | AF077196 |      | 1,82 | 2,66 |      |      |      |
| Potassium channel, subfamily K, member 5 (TASK2)              | AF084830 | 2,02 | 1,27 |      |      |      |      |
| Solute carrier family 21, member 3                            | AF085224 | 1,98 | 0,51 | 1,89 | 2,66 |      |      |
| Heart and neural crest derivatives expressed :                | AF087940 | 1,89 | 2,49 |      |      |      |      |
| Flotillin 1                                                   | AF089750 |      | 1,86 | 1,98 |      |      |      |
| L-3-hydroxyacyl-CoA dehydrogenase, short chain                | AF095703 |      | 2,23 | 0,59 |      |      |      |
| Host cell factor 2 (HCF-2)                                    | AF117210 |      | 1,88 | 3,45 |      |      |      |
| Ig lambda 1 variable region                                   | AF124182 | 1,91 | 1,40 |      |      |      |      |
| SH2-containing protein Nsp3                                   | AF124251 |      |      |      | 1,92 | 0,77 |      |
| Prohibitin 2                                                  | AF126021 |      | 2,33 | 0,59 | 1,89 | 0,66 |      |
| Beta-transducin repeat containing                             | AF129530 |      |      |      | 1,83 | 1,42 |      |
| Serpine1 mRNA binding protein 1                               | AF131807 |      |      |      | 1,92 | 1,08 |      |
| similar to guanine nucleotide exchange factor p53             | AF131824 |      | 1,84 | 2,30 |      |      |      |
| Tubulin, alpha 3                                              | AF141347 |      | 2,04 | 1,09 |      |      |      |
| Olfactory receptor, family 52, subfamily K, member 3          | AF143328 |      | 2,09 | 1,09 |      |      |      |
| Coatomer protein complex, subunit zeta 1                      | AF151878 |      | 2,21 | 1,09 | 1,81 | 1,43 |      |
| Protocadherin gamma subfamily A, 12                           | AF152318 |      | 1,99 | 2,97 | 2,00 | 1,23 |      |
| PEA15 protein (PEA15)                                         | AF153274 |      |      |      | 1,95 | 0,66 |      |
| G-protein signalling modulator 3 (AGS3-like)                  | AF155657 |      | 1,99 | 1,09 | 1,86 | 1,24 |      |
| Serum/glucocorticoid regulated kinase family, member 3        | AF169035 | 2,15 | 3,23 |      | 1,93 | 0,77 |      |
| LIN-7 homolog 1 (MALS-1)                                      | AF173081 | 1,97 | 2,99 |      |      |      |      |
| Talin 1                                                       | AF177198 |      | 1,86 | 3,45 |      |      |      |
| Ion channel homolog (IWU1)                                    | AF177940 | 2,20 | 0,51 |      |      |      |      |
| Rho guanine nucleotide exchange factor (GEF) 12               | AF180681 |      | 2,08 | 1,09 | 1,94 | 0,66 |      |
| PI-3-kinase-related kinase SMG-1                              | AF186377 |      | 2,17 | 1,09 | 1,99 | 0,66 |      |
| Heat shock 70kDa protein 5                                    | AF188611 |      | 1,89 | 1,98 |      |      |      |
| Ubiquilin 2                                                   | AF189009 |      | 1,92 | 2,30 |      |      |      |
| Stomatin (EPB72)-like 2                                       | AF190167 |      | 2,11 | 1,09 | 1,83 | 0,91 |      |
| Fuse-binding protein-interacting repressor                    | AF190744 |      |      |      | 1,81 | 1,23 |      |
| Heat shock 22kDa protein 8 (E2IG1)                            | AF191017 |      |      |      | 2,17 | 0,49 |      |
| Makorin, ring finger protein, 1                               | AF192784 |      |      |      | 2,41 | 0,49 |      |
| F-box and leucine-rich repeat protein 4                       | AF199355 |      |      |      | 13,7 | 0,49 |      |
| Early B-cell transcription factor (EBF)                       | AF208502 | 2,07 | 0,51 |      |      |      |      |
| SEC11-like 3                                                  | AF212233 |      | 1,86 | 2,07 | 2,09 | 0,49 |      |
| Glutathione S-transferase omega 1                             | AF212303 |      |      |      | 1,84 | 0,77 |      |
| HSCARG protein                                                | AF225419 |      | 1,86 | 2,30 |      |      |      |
| Sodium channel, voltage-gated, type III, alpha 3              | AF225986 |      | 2,11 | 1,09 | 1,88 | 1,93 |      |
| Leucine-rich repeats and death domain containing              | AF229178 |      | 1,91 | 1,98 | 2,03 | 0,49 |      |
| Rab-related GTP-binding protein                               | AF235022 | 2,01 | 2,99 |      | 2,00 | 0,66 |      |
| Na+,K+-ATPase gamma-subunit (FXVD2) gene                      | AF241235 |      | 2,12 | 1,09 |      |      |      |
| ATP binding cassette 7 (ABC7) gene                            | AF241883 |      | 1,83 | 2,97 |      |      |      |
| NADPH oxidase 4                                               | AF261943 |      | 2,08 | 1,98 |      |      |      |
| Alpha-2A adrenergic receptor                                  | AF284095 | 1,86 | 3,56 |      |      |      |      |
| CIG30 gene                                                    | AF292387 |      | 2,19 | 1,09 |      |      |      |
| Toll-like receptor 10                                         | AF296673 | 2,09 | 0,51 |      |      |      |      |
| LIM domain only 6                                             | AI017508 |      |      |      | 1,81 | 1,24 |      |
| v-jun avian sarcoma virus 17 oncogene homolog                 | AI051628 | 1,97 | 2,99 |      |      |      |      |
| CD99 antigen                                                  | AI061430 |      | 1,83 | 2,30 | 1,86 | 0,66 |      |
| Glycophorin A (includes MN blood group)                       | AI133438 |      | 3,16 | 1,09 |      |      |      |
| Dual-specificity tyrosine phosphorylation-regulated kinase 1/ | AI174234 |      | 1,88 | 2,30 | 1,81 | 1,93 |      |
| MHC class II, DQ alpha 1                                      | AI249268 |      | 2,46 | 0,59 |      |      |      |
| Family with sequence similarity 89, member B                  | AI280835 |      | 1,82 | 2,66 |      |      |      |
| E74-like factor 2 (ets domain transcription factor)           | AI299518 |      | 2,11 | 1,09 |      |      |      |
| TRM1 tRNA methyltransferase 1 homolog                         | AI333215 |      | 1,82 | 2,66 |      |      |      |
| Ribosomal protein L23                                         | AI349581 |      | 1,83 | 2,30 |      |      |      |
| Calcium channel, voltage-dependent, L type, alpha 1S subunit  | AI417964 | 2,01 | 2,99 | 2,15 | 1,09 |      |      |
| Splicing factor 4                                             | AI453069 |      | 1,82 | 2,97 |      |      |      |
| Spermidine synthase                                           | AI499647 |      | 1,91 | 2,07 |      |      |      |
| HERPUD1                                                       | AI590087 | 2,07 | 0,51 |      | 1,90 | 0,66 |      |

|                                                          |          |      |      |      |      |      |      |
|----------------------------------------------------------|----------|------|------|------|------|------|------|
| Ig heavy constant mu                                     | AI634950 | 5,06 | 0,51 | 2,09 | 2,97 | 2,76 | 0,49 |
| Neuronatin                                               | AI638471 |      |      | 2,19 | 1,09 | 2,10 | 0,49 |
| Carbonyl reductase 3                                     | AI658832 |      |      | 1,86 | 2,30 |      |      |
| Epidermal growth factor receptor pathway substrate 4     | AI679737 | 2,30 | 0,51 |      |      | 1,89 | 1,23 |
| TBP-associated factor, RNA polymerase II 20kDa (TAF12)   | AI681931 |      |      | 1,91 | 2,07 | 1,81 | 1,42 |
| Peptidyl-prolyl isomerase G (cyclophilin G)              | AI742687 |      |      | 2,11 | 1,09 | 2,25 | 0,49 |
| Mitogen-activated protein kinase kinase 4                | AI752491 |      |      |      |      | 1,82 | 2,25 |
| Translocated promoter region (to activated MET oncogene) | AI765790 |      |      | 1,80 | 3,78 | 1,81 | 1,23 |
| Cyclin D3                                                | AI803460 |      |      | 2,04 | 1,09 |      |      |
| RAN binding protein 2-like 1                             | AI859613 |      |      |      |      | 1,88 | 0,91 |
| Surfeit 5                                                | AI884541 |      |      | 1,87 | 2,30 | 2,20 | 0,49 |
| Chromosome X open reading frame 5                        | AI888578 |      |      | 1,99 | 1,76 | 1,92 | 1,08 |
| Kinectin 1 (kinesin receptor)                            | AI916662 |      |      | 1,88 | 2,07 | 1,94 | 0,66 |
| Splicing factor SF1 (ZNF162)                             | AJ000052 | 1,85 | 2,32 |      |      |      |      |
| Pleckstrin homology, Sec7 and coiled-coil domains 1      | AJ005197 |      |      | 1,89 | 2,30 |      |      |
| Ig kappa constant                                        | AJ010442 | 2,64 | 0,51 |      |      | 2,49 | 0,49 |
| p10 for chaperonin 10 and p60 for chaperonin 60          | AJ250915 |      |      | 2,18 | 1,09 |      |      |
| L(3)mbt-like 2                                           | AJ305227 |      |      |      |      | 2,05 | 0,66 |
| NAT1 gene for arylamine N-acetyltransferase 1            | AJ307007 |      |      | 2,21 | 1,09 |      |      |
| Chromosome 10 open reading frame 26                      | AK000161 |      |      | 1,91 | 1,76 |      |      |
| Nucleolin                                                | AK000221 |      |      |      |      | 1,92 | 0,66 |
| Solute carrier family 16, member 5                       | AK000416 |      |      |      |      | 1,86 | 0,91 |
| Hypothetical protein FLJ20551                            | AK000558 |      |      | 2,05 | 1,09 |      |      |
| Hypothetical protein FLJ13868                            | AK000679 |      |      | 1,81 | 2,30 |      |      |
| Serologically defined colon cancer antigen 5             | AK001296 |      |      | 1,88 | 4,43 |      |      |
| KIAA1052 protein                                         | AK001412 |      |      |      |      | 2,06 | 0,66 |
| Chromosome 20 open reading frame 14                      | AK001554 |      |      | 1,96 | 2,30 |      |      |
| FLJ25476 protein                                         | AK021842 | 2,04 | 2,49 |      |      |      |      |
| TBC1 domain family, member 15                            | AK022147 | 1,83 | 4,43 |      |      |      |      |
| Clone MAMMA1001397                                       | AK022309 |      |      | 1,84 | 2,30 |      |      |
| Putative acyl-CoA dehydrogenase                          | AK022654 |      |      | 1,91 | 2,07 |      |      |
| WD repeat domain 54                                      | AK023015 |      |      | 1,87 | 2,30 | 1,81 | 1,42 |
| Sorting nexin 22                                         | AK024014 |      |      | 2,18 | 1,09 |      |      |
| Chromosome 1 open reading frame 115                      | AK024208 |      |      | 1,86 | 2,30 |      |      |
| Zinc finger protein 496                                  | AK024643 |      |      |      |      | 2,22 | 1,93 |
| KIAA0284 protein                                         | AK025023 | 2,58 | 0,51 |      |      |      |      |
| Autism susceptibility candidate 2                        | AK025298 |      |      | 3,32 | 0,59 | 2,25 | 0,49 |
| KIAA0703 protein                                         | AK025424 |      |      | 1,81 | 2,30 |      |      |
| Acidic nuclear phosphoprotein 32 family, member E        | AK025624 |      |      | 1,83 | 3,45 | 2,07 | 0,66 |
| CTP synthase II                                          | AK025654 |      |      |      |      | 2,35 | 0,49 |
| Syntaxin 16                                              | AK026970 |      |      | 1,93 | 2,66 | 2,25 | 0,49 |
| TGF beta 1 induced transcript 4                          | AK027071 | 3,21 | 2,99 |      |      |      |      |
| Hypothetical protein FLJ23436                            | AK027089 |      |      | 1,92 | 2,30 | 2,32 | 0,49 |
| Acyl-CoA dehydrogenase family, member 1                  | AK027186 |      |      |      |      | 1,82 | 1,42 |
| NFATC2IP                                                 | AK027545 |      |      |      |      | 1,89 | 0,77 |
| Neurogenic locus notch homolog protein 4 precursor       | AK027618 | 1,95 | 1,55 |      |      |      |      |
| Hippocampus abundant transcript-like 1                   | AK027659 |      |      | 1,87 | 2,30 | 2,29 | 0,49 |
| Clone RP5-1042K10 on chromosome 22q13.1-13.2             | AL022238 |      |      | 1,81 | 2,30 | 2,12 | 0,49 |
| Zinc finger protein 337                                  | AL049942 |      |      | 1,85 | 2,30 | 2,05 | 0,49 |
| Clone DKFZp586G021                                       | AL050127 | 1,93 | 1,40 | 2,17 | 1,09 | 2,22 | 0,66 |
| Homeo box A2                                             | AL079274 |      |      | 2,12 | 1,09 |      |      |
| REV3-like, catalytic subunit of DNA polymerase zeta      | AL096744 |      |      | 1,99 | 2,30 |      |      |
| Vacuolar protein sorting 39                              | AL117456 |      |      |      |      | 2,06 | 2,00 |
| MOB1, Mps One Binder kinase activator-like 1E            | AL122062 |      |      | 1,89 | 2,30 | 1,88 | 0,77 |
| WD repeat domain 75                                      | AL122097 |      |      |      |      | 1,83 | 2,25 |
| Transducer of ERBB2, 2                                   | AL133080 |      |      |      |      | 1,82 | 1,08 |
| Tigger transposable element derived 1                    | AL136539 |      |      | 2,11 | 2,97 |      |      |
| Collagen, type XXI, alpha 1                              | AL136624 |      |      | 1,97 | 1,09 |      |      |
| Hypothetical protein FLJ13576                            | AL136626 |      |      | 1,94 | 2,30 | 1,87 | 2,86 |
| Factor for adipocyte differentiation 158                 | AL136919 | 2,18 | 0,51 |      |      |      |      |
| Myosin IXA                                               | AL137287 | 1,93 | 0,51 |      |      |      |      |
| Nuclear receptor binding protein 2                       | AL137662 |      |      |      |      | 1,87 | 3,16 |
| Ral GEF with PH domain and SH3 binding motif 2           | AL137687 |      |      | 1,86 | 2,89 |      |      |
| TBC1 domain family, member 16                            | AL512709 |      |      | 1,85 | 4,43 |      |      |
| ArsA arsenite transporter, ATP-binding, homolog 1        | AL519675 |      |      |      |      | 1,91 | 2,00 |
| Forkhead box M1                                          | AL525810 |      |      | 2,02 | 1,76 | 1,85 | 0,91 |
| Zinc finger protein 22 (KOX 15)                          | AL528233 |      |      |      |      | 1,95 | 0,91 |

|                                                        |          |      |      |      |      |      |      |
|--------------------------------------------------------|----------|------|------|------|------|------|------|
| Cytochrome P450, family 3, subfamily A, polypeptide 7  | AL531737 |      |      |      |      | 1,86 | 1,83 |
| Peptidylprolyl isomerase F (cyclophilin F)             | AL531948 |      |      | 1,89 | 2,30 |      |      |
| Ribosomal protein S7                                   | AL535356 | 2,97 | 0,51 | 2,27 | 1,09 | 2,70 | 0,49 |
| Serine proteinase inhibitor, clade F, member 1         | AL541945 | 2,15 | 0,51 | 2,39 | 0,59 | 2,57 | 0,49 |
| CD74 antigen (MHC class II antigen-associated)         | AL543515 | 1,84 | 3,56 |      |      |      |      |
| Myeloid/lymphoid or mixed-lineage leukemia:            | AL544994 |      |      |      |      | 2,06 | 1,24 |
| Frizzled-related proteir                               | AL546699 |      |      | 1,92 | 1,98 | 1,87 | 1,08 |
| Connective tissue growth factor                        | AL547439 | 1,86 | 1,55 |      |      |      |      |
| Surfeit 1                                              | AL549808 |      |      |      |      | 1,98 | 0,66 |
| TGF beta-induced factor                                | AL549846 | 2,07 | 0,51 | 1,95 | 1,76 | 2,16 | 0,49 |
| Fibulin 5                                              | AL570066 |      |      |      |      | 2,26 | 0,49 |
| Farnesyltransferase, CAAX box, alpha                   | AL574829 |      |      |      |      | 1,83 | 0,77 |
| Leukocyte-associated Ig-like receptor 1                | AL575990 |      |      | 2,18 | 0,59 | 2,26 | 0,49 |
| Ring finger protein 1                                  | AL576514 |      |      | 1,92 | 1,77 | 2,08 | 0,49 |
| Microspherule protein 1                                | AL581415 |      |      |      |      | 1,92 | 0,66 |
| 2',5'-oligoadenylate synthetase 1                      | AL582281 | 2,47 | 0,51 |      |      |      |      |
| Mannosidase, alpha, class 1B, member 1                 | AL583481 |      |      | 2,16 | 1,76 | 1,85 | 4,13 |
| PEPP subfamily gene 2                                  | AL590526 |      |      | 1,86 | 1,98 | 1,81 | 1,43 |
| Myosin, light polypeptide 1, alkali; skeletal, fas     | AL598805 |      |      |      |      | 1,89 | 0,91 |
| Liprin, alpha 1 (PPFIA1)                               | AL600593 |      |      | 1,90 | 2,30 | 1,85 | 0,86 |
| Clone DKFZp313J0242 5                                  | AL601447 |      |      |      |      | 2,15 | 1,83 |
| Clone KB1125A3 on chromosome 22q11.2                   | AP000350 |      |      | 1,97 | 1,09 | 2,31 | 0,49 |
| Chromosome 3p21.3, anti-oncogene region                | AP000500 |      |      | 1,98 | 1,76 |      |      |
| Chromosome 3p21.3, anti-oncogene region                | AP000500 |      |      |      |      | 2,00 | 0,66 |
| Clone KB1440D3 on chromosome 22q11.2                   | AP000553 |      |      |      |      | 1,82 | 2,86 |
| Chromosome 21q, section 58/105                         | AP001714 |      |      | 1,95 | 2,30 |      |      |
| Chromosome 21q, section 60/105                         | AP001716 |      |      |      |      | 1,96 | 1,06 |
| Chromosome 21q, section 62/105                         | AP001718 |      |      | 1,88 | 2,30 |      |      |
| Clone KB1184D12 on chromosome 8q23                     | AP003351 |      |      |      |      | 1,83 | 1,08 |
| Ral GEF with PH domain and SH3 binding motif 2         | AU119325 |      |      |      |      | 2,19 | 0,49 |
| Methionyl aminopeptidase 2                             | AU119678 |      |      | 2,17 | 1,09 |      |      |
| Desmoglein 2                                           | AU124258 | 1,89 | 3,56 | 2,07 | 1,09 | 2,06 | 0,66 |
| Caspase 3, apoptosis-related cysteine peptidas         | AU125557 |      |      |      |      | 1,93 | 1,23 |
| Adducin 3 (gamma)                                      | AU134494 |      |      |      |      | 1,95 | 1,23 |
| Kruppel-like factor 6                                  | AU139931 |      |      | 2,46 | 0,59 | 2,48 | 0,49 |
| Casein kinase 1, alpha 1                               | AU139950 |      |      |      |      | 2,03 | 0,66 |
| ATP synthase, mitochondrial, alpha chain (ATP5A1)      | AU143486 |      |      |      |      | 1,96 | 1,93 |
| Glutamyl-peptide cyclotransferase (glutamyl cyclase)   | AV707013 |      |      |      |      | 1,84 | 1,42 |
| Apolipoprotein C-I                                     | AV709433 |      |      | 1,99 | 1,09 |      |      |
| S100 calcium-binding protein A4                        | AV713821 | 2,64 | 0,51 | 1,92 | 2,07 | 2,22 | 0,49 |
| Vesicle-associated membrane protein 8 (endobrevin)     | AV716151 |      |      | 1,86 | 2,30 |      |      |
| Thymosin, beta 10                                      | AV717021 |      |      | 2,04 | 1,09 | 1,81 | 4,96 |
| Nucleolin                                              | AV724878 |      |      | 1,81 | 4,60 | 2,36 | 0,66 |
| Clone CS0CAP007YH10                                    | AV740966 |      |      | 2,05 | 1,09 |      |      |
| v-fos FBJ murine osteosarcoma viral oncogene homolog   | AV747778 | 4,15 | 0,51 | 4,20 | 0,59 | 2,48 | 0,49 |
| Translation initiation factor 4A, isoform 1            | AV756187 |      |      | 1,89 | 2,30 | 1,82 | 1,23 |
| Tropomyosin 3                                          | AW024537 |      |      | 2,08 | 1,09 | 1,95 | 0,66 |
| Interferon-induced protein 41                          | AW024557 |      |      |      |      | 2,16 | 0,49 |
| RNA guanylyltransferase and 5'-phosphatas              | AW069237 |      |      | 2,00 | 1,09 |      |      |
| Keratin 16                                             | AW082035 |      |      |      |      | 2,65 | 0,66 |
| Stem-loop (histone) binding proteir                    | AW150631 |      |      | 2,34 | 0,59 | 1,95 | 0,66 |
| Potassium voltage-gated channel, subfamily G, member 4 | AW162513 | 2,03 | 2,32 |      |      |      |      |
| Dynamin 1                                              | AW206374 |      |      | 2,44 | 0,59 | 2,10 | 0,49 |
| Zinc finger protein 36, C3H type-like 2                | AW262861 |      |      | 2,77 | 0,59 | 2,16 | 0,49 |
| Diubiquitin                                            | AW270961 | 1,86 | 2,49 |      |      |      |      |
| dUTP pyrophosphatase                                   | AW276291 |      |      |      |      | 2,01 | 0,66 |
| BCL2-antagonist/killer 1                               | AW276601 |      |      |      |      | 1,86 | 2,25 |
| Sprouty-related, EVH1 domain containing 2              | AW296083 |      |      |      |      | 1,86 | 2,00 |
| SON DNA binding protein                                | AW328025 |      |      |      |      | 1,86 | 1,55 |
| Presenilin 1 (Alzheimer disease 3)                     | AW376952 |      |      |      |      | 1,85 | 0,86 |
| Corticotropin releasing hormone                        | AW513199 | 2,24 | 3,23 |      |      |      |      |
| Solute carrier family 1, member 4                      | AW612968 |      |      | 2,20 | 3,45 |      |      |
| BRCA1 associated proteir                               | AW804509 | 2,50 | 0,51 |      |      |      |      |
| Ig lambda-like polypeptide 1, pre-B-cell specific      | AW898081 |      |      | 2,03 | 1,09 | 2,04 | 0,49 |
| Bromodomain containing 3                               | AW953714 |      |      | 1,93 | 2,30 | 1,86 | 2,25 |
| Carbohydrate sulfotransferase 10                       | AW956276 |      |      |      |      | 2,22 | 4,13 |
| Death-inducing-protein                                 | AW962464 |      |      |      |      | 1,85 | 0,77 |

|                                                            |          |      |      |      |      |      |      |
|------------------------------------------------------------|----------|------|------|------|------|------|------|
| Interferon consensus sequence binding protein 1            | AW964220 | 2,16 | 0,51 |      |      |      |      |
| Myeloid differentiation primary response gene              | AW965179 |      |      | 2,33 | 0,59 | 1,86 | 0,66 |
| NADH dehydrogenase 1, subcomplex unknown, 1                | AW965948 |      |      | 1,93 | 1,76 | 1,81 | 1,93 |
| Golgi SNAP receptor complex member 1                       | AW970923 |      |      | 1,99 | 1,09 |      |      |
| Glutaredoxin 2                                             | AY038988 | 1,95 | 2,49 |      |      |      |      |
| KIAA0412 protein                                           | BAA24842 | 1,92 | 4,43 |      |      |      |      |
| Keratin 6                                                  | BAA85657 | 1,82 | 2,99 |      |      |      |      |
| Unnamed protein                                            | BAB27795 |      |      | 2,11 | 1,76 |      |      |
| Unnamed protein                                            | BAB32173 |      |      | 5,37 | 2,30 |      |      |
| KIAA0174 protein                                           | BC000116 |      |      | 1,80 | 2,97 |      |      |
| Splicing factor, arginine/serine-rich 10                   | BC000160 |      |      | 1,82 | 2,30 | 2,30 | 0,49 |
| NADH dehydrogenase (ubiquinone) Fe-S protein 2             | BC000170 |      |      | 1,83 | 2,89 |      |      |
| NADH dehydrogenase (ubiquinone) Fe-S protein 2             | BC000170 |      |      |      |      | 1,84 | 2,25 |
| Protease, serine, 15                                       | BC000235 |      |      |      |      | 1,89 | 2,00 |
| Aldo-keto reductase family 1, member B1                    | BC000260 |      |      | 1,86 | 2,07 |      |      |
| Flap structure-specific endonuclease 1                     | BC000323 |      |      |      |      | 1,91 | 1,66 |
| Pyruvate dehydrogenase (lipoamide) bet                     | BC000439 |      |      |      |      | 1,83 | 1,83 |
| Mitochondrial ribosomal protein L28                        | BC000507 |      |      |      |      | 1,92 | 2,86 |
| Proteasome, subunit, beta type, 1                          | BC000508 |      |      | 1,96 | 1,76 | 2,05 | 0,66 |
| 2',5'-oligoadenylate synthetase 1                          | BC000562 | 1,92 | 0,51 |      |      |      |      |
| Keratin 8                                                  | BC000654 |      |      |      |      | 2,00 | 0,66 |
| Solute carrier family 25, member 19                        | BC001075 |      |      |      |      | 2,01 | 2,25 |
| RAS-like, family 11, member B                              | BC001087 |      |      |      |      | 9,33 | 2,25 |
| Deoxyguanosine kinase                                      | BC001121 |      |      | 1,96 | 1,98 |      |      |
| RNA binding motif protein 15B                              | BC001367 |      |      | 1,87 | 3,45 | 2,00 | 0,66 |
| Succinate dehydrogenase complex, subunit 4                 | BC001380 |      |      | 2,18 | 0,59 | 1,83 | 0,86 |
| Dimethylarginine dimethylaminohydrolase 2                  | BC001435 |      |      |      |      | 1,84 | 2,25 |
| Linker for activation of B cells (LAB)                     | BC001609 | 1,86 | 0,51 |      |      |      |      |
| F11 receptor                                               | BC001699 |      |      | 2,02 | 1,09 |      |      |
| Wingless-type MMTV integration site family, member 5E      | BC001749 |      |      | 1,85 | 2,30 | 2,23 | 0,49 |
| Myeloid ecotropic viral integration site 1 homolog 2       | BC001844 |      |      | 1,83 | 3,45 |      |      |
| Etoposide induced 2.4 mRNA                                 | BC002390 |      |      | 1,92 | 1,98 | 2,04 | 0,49 |
| Kelch-like ECH-associated protein 1                        | BC002417 |      |      |      |      | 2,02 | 0,91 |
| v-rat murine sarcoma 3611 viral oncogene homolog 3         | BC002466 |      |      | 1,94 | 2,30 |      |      |
| Chromatin modifying protein 2A                             | BC002502 |      |      |      |      | 1,96 | 0,66 |
| Niemann-Pick disease, type C2                              | BC002532 |      |      | 1,96 | 1,76 |      |      |
| Cathepsin S                                                | BC002642 |      |      |      |      | 1,94 | 0,66 |
| Keratin 14                                                 | BC002690 |      |      |      |      | 1,86 | 1,42 |
| Keratin 7                                                  | BC002700 |      |      |      |      | 2,00 | 4,96 |
| BoIA-like 1                                                | BC002771 |      |      |      |      | 1,82 | 1,55 |
| Tropomyosin 4                                              | BC002827 |      |      |      |      | 1,84 | 1,43 |
| Hypothetical protein MGC10433                              | BC002868 |      |      | 2,01 | 1,98 |      |      |
| Cholinergic receptor, nicotinic, alpha polypeptide 3       | BC002996 |      |      | 1,89 | 1,98 | 1,82 | 1,23 |
| Lectin, galactoside-binding, soluble, 3 binding protein 1  | BC002998 |      |      | 1,86 | 4,75 |      |      |
| NTF2-like export factor 1                                  | BC003410 |      |      | 1,81 | 2,30 |      |      |
| Glycosyltransferase MGAT1                                  | BC003575 |      |      | 2,22 | 1,09 | 2,26 | 0,49 |
| Metastasis associated 1 family, member 3                   | BC004227 |      |      | 1,88 | 2,07 | 2,15 | 0,49 |
| Hypothetical protein MGC10986                              | BC004400 |      |      | 2,14 | 1,77 |      |      |
| ATPase, H+ transporting, lysosomal, V1 subunit E isoform 1 | BC004443 |      |      | 2,14 | 1,09 | 1,91 | 0,77 |
| Peptidylprolyl isomerase F (cyclophilin F)                 | BC005020 |      |      | 2,05 | 3,78 |      |      |
| Ubiquitin fusion degradation 1 like                        | BC005087 |      |      | 1,83 | 3,79 |      |      |
| Ig kappa constant                                          | BC005332 | 3,30 | 0,51 | 3,40 | 0,59 |      |      |
| CDC-like kinase 3                                          | BC006103 |      |      | 1,93 | 1,76 | 2,02 | 0,66 |
| SH3-domain binding protein 5 (BTK-associated)              | BC006169 |      |      | 1,82 | 4,43 | 1,91 | 1,42 |
| Guanylate kinase 1                                         | BC006249 |      |      | 1,87 | 2,30 |      |      |
| Clathrin, light polypeptide (Lcb)                          | BC006332 |      |      |      |      | 1,94 | 1,08 |
| PHD finger protein 20                                      | BC006415 |      |      | 1,96 | 2,97 |      |      |
| U2-associated SR140 protein                                | BC006474 |      |      |      |      | 2,10 | 0,66 |
| H2.0-like homeo box 1                                      | BC007294 |      |      | 1,87 | 3,45 |      |      |
| Actin, gamma 1                                             | BC007442 |      |      | 1,89 | 2,07 |      |      |
| Protein phosphatase 1, regulatory (inhibitor) subunit 2    | BC007655 |      |      |      |      | 1,84 | 1,06 |
| Ubiquitin-like 7 (bone marrow stromal cell-derived)        | BC007913 |      |      | 2,01 | 1,20 | 1,80 | 1,08 |
| Insulin-like growth factor binding protein 5               | BC008099 |      |      | 2,01 | 1,76 |      |      |
| Hypothetical protein LOC339803                             | BC008254 | 2,06 | 0,51 |      |      |      |      |
| Chemokine (C-C motif) ligand 5 (CCL5)                      | BC008600 |      |      | 1,99 | 1,20 |      |      |
| Casein kinase 1, alpha 1                                   | BC008717 |      |      | 2,30 | 3,45 |      |      |
| Nardilysin (N-arginine dibasic convertase)                 | BC008775 |      |      |      |      | 1,99 | 0,66 |

|                                                              |          |      |      |       |      |      |      |
|--------------------------------------------------------------|----------|------|------|-------|------|------|------|
| Integrin, alpha L                                            | BC008777 |      |      |       |      | 1,84 | 1,42 |
| Cold shock domain protein A                                  | BC008801 |      |      |       |      | 1,90 | 0,66 |
| Rho GDP dissociation inhibitor (GDI) beta                    | BC009200 |      |      | 1,82  | 2,30 | 1,81 | 1,08 |
| Formin binding protein 1                                     | BC009262 |      |      | 2,03  | 1,09 | 1,80 | 1,24 |
| Hippocalcin-like 1                                           | BC009846 | 1,96 | 2,49 | 2,32  | 0,59 | 2,10 | 0,49 |
| Translation elongation factor 1 delta                        | BC009907 |      |      |       |      | 2,71 | 1,83 |
| CK2 interacting protein 1                                    | BC010149 |      |      | 2,30  | 1,09 | 2,66 | 0,49 |
| Proline-, glutamic acid-, leucine-rich protein 1             | BC010457 |      |      |       |      | 1,94 | 0,66 |
| Proprotein convertase subtilisin/kexin type 1                | BC010696 |      |      | 2,18  | 1,09 |      |      |
| Transmembrane 9 superfamily member 1                         | BC010856 |      |      | 32,94 | 1,77 |      |      |
| Acetyl-CoA acyltransferase 1                                 | BC011977 |      |      | 1,87  | 2,30 | 2,04 | 0,66 |
| Zinc finger protein 3 (A8-51)                                | BC013603 |      |      |       |      | 1,89 | 1,23 |
| Promethin                                                    | BC015812 |      |      | 1,83  | 4,60 |      |      |
| RAB11A, member RAS oncogene family                           | BE122870 |      |      | 1,90  | 2,97 |      |      |
| Serpins B13                                                  | BE148534 | 1,91 | 1,55 | 2,00  | 1,98 |      |      |
| Annexin A11                                                  | BE294577 |      |      | 1,87  | 1,98 |      |      |
| WD repeat and FYVE domain containing 1                       | BE301038 |      |      |       |      | 1,83 | 1,08 |
| Interferon (alpha, beta and omega) receptor 1                | BE315416 |      |      |       |      | 1,89 | 0,91 |
| TAP binding protein (tapasin)                                | BE394234 |      |      | 2,39  | 0,59 | 1,91 | 0,66 |
| Regulator of G-protein signalling 14                         | BE394825 |      |      | 1,81  | 4,43 | 2,14 | 0,49 |
| Myeloid cell leukemia sequence 1 (BCL2-related)              | BE408610 | 2,08 | 0,51 |       |      |      |      |
| N-acetylneuraminic acid synthase                             | BE614630 |      |      | 2,10  | 1,09 | 2,00 | 0,49 |
| Chromobox homolog 7                                          | BE644965 |      |      | 2,10  | 1,09 |      |      |
| Proteasome 26S subunit, ATPase, 4                            | BE728626 |      |      | 1,97  | 1,09 | 2,09 | 0,49 |
| Calcium homeostasis endoplasmic reticulum protein            | BE741277 |      |      | 1,86  | 2,30 | 2,05 | 0,49 |
| Tubulin, alpha 1 (testis specific)                           | BE742772 |      |      |       |      | 2,20 | 0,77 |
| Acid phosphatase 2, lysosoma                                 | BE745075 |      |      |       |      | 1,83 | 1,08 |
| Proline arginine-rich end leucine-rich repeat protein        | BE836107 | 1,90 | 3,23 |       |      |      |      |
| Nuclear DNA-binding protein                                  | BE857571 |      |      |       |      | 1,92 | 1,93 |
| Tropomyosin 2 (beta)                                         | BE876028 |      |      |       |      | 1,99 | 1,23 |
| Translation initiation factor 4E-like 3                      | BE886748 |      |      |       |      | 1,83 | 3,16 |
| Ubiquitin associated domain containing 1                     | BE892211 |      |      |       |      | 2,51 | 0,49 |
| Clathrin, light polypeptide (Lca)                            | BE909056 |      |      | 1,84  | 2,30 | 1,86 | 0,77 |
| Carnitine palmitoyltransferase II                            | BF026359 | 1,80 | 2,32 |       |      | 1,81 | 2,44 |
| Inositol 1,4,5-trisphosphate 3-kinase B                      | BF108757 |      |      | 1,81  | 2,89 |      |      |
| Myotubularin related protein 1                               | BF110149 |      |      | 1,96  | 2,30 |      |      |
| PTK9L protein tyrosine kinase 9-like                         | BF220316 |      |      | 2,15  | 1,09 | 2,44 | 0,49 |
| Beta-1,4-galactosyltransferase 5                             | BF229298 |      |      | 2,39  | 0,59 | 2,00 | 0,49 |
| Myosin, heavy polypeptide 9, non-muscle                      | BF304650 |      |      |       |      | 2,08 | 0,49 |
| Histone deacetylase 5                                        | BF305705 | 2,07 | 4,95 | 2,51  | 1,09 | 2,43 | 0,49 |
| Ig lambda joining 3                                          | BF338816 | 2,07 | 0,51 |       |      | 1,83 | 0,77 |
| PHD finger protein 1                                         | BF475261 |      |      | 2,02  | 1,76 |      |      |
| Alpha-N-acetylglucosaminyl phosphodiesterase (NAGPA)         | BF594186 |      |      | 2,04  | 2,30 |      |      |
| Translocation associated fusion protein IRTA1/IGA1           | BF663123 |      |      |       |      | 1,96 | 0,66 |
| Ribosomal protein, large, PC                                 | BF669160 |      |      | 1,80  | 2,89 |      |      |
| Actin, alpha 2, smooth muscle, aorta                         | BF681347 |      |      |       |      | 1,87 | 3,72 |
| Plexin A3                                                    | BF725116 | 1,91 | 2,32 |       |      | 1,89 | 1,42 |
| MHC class II, DR alpha                                       | BF795929 | 2,47 | 0,51 | 2,27  | 1,09 | 2,85 | 0,49 |
| Erythrocyte membrane protein band 4.1-like 2                 | BF799654 | 2,01 | 2,99 |       |      | 1,96 | 1,83 |
| Splicing factor, arginine/serine-rich 4                      | BF855449 |      |      | 1,87  | 2,30 | 2,37 | 0,49 |
| Aspartyl-tRNA synthetase                                     | BF969463 |      |      | 1,93  | 1,98 |      |      |
| Tyrosine 3/tryptophan 5-monooxygenase activation protein     | BF969911 |      |      | 2,18  | 1,09 |      |      |
| Cell division cycle 25B                                      | BF976307 |      |      | 2,19  | 1,09 | 2,21 | 0,49 |
| Glucagon                                                     | BF980737 | 2,22 | 0,51 |       |      |      |      |
| Myosin light chain 1 slow a                                  | BF981829 |      |      |       |      | 1,84 | 3,07 |
| CD20 antigen (B-lymphocyte cell-surface antigen B1)          | BG024663 | 2,71 | 0,51 | 2,04  | 1,09 | 2,37 | 0,49 |
| Phosphatidylinositol 4-kinase, catalytic, beta polypeptide   | BG025389 |      |      |       |      | 1,86 | 3,07 |
| Beclin 1 (coiled-coil, myosin-like BCL2 interacting protein) | BG025795 |      |      | 1,89  | 1,76 |      |      |
| Proteasome 26S subunit, non-ATPase, 13                       | BG035188 |      |      | 2,24  | 1,09 | 2,14 | 0,49 |
| v-yes-1 Yamaguchi sarcoma viral related oncogene homolog     | BG108304 | 1,81 | 3,23 |       |      |      |      |
| Tyrosine 3/tryptophan 5-monooxygenase activation protein,    | BG111102 |      |      |       |      | 1,87 | 0,66 |
| KRIT1, ankyrin repeat containing                             | BG163551 |      |      | 1,87  | 2,30 | 2,03 | 0,49 |
| TBP-associated factor, RNA polymerase II 32kDa (TAF9)        | BG164482 |      |      |       |      | 2,08 | 0,66 |
| Interferon receptor 1-bound protein                          | BG167159 |      |      |       |      | 1,97 | 1,55 |
| Radical fringe homolog                                       | BG169279 |      |      |       |      | 2,02 | 0,86 |
| ATX1 antioxidant protein 1 homolog                           | BG170911 |      |      | 1,81  | 2,30 |      |      |
| MHC class II, DO beta                                        | BG176768 | 2,43 | 0,51 |       |      | 1,83 | 1,23 |

|                                                                |          |      |      |      |      |      |      |  |  |
|----------------------------------------------------------------|----------|------|------|------|------|------|------|--|--|
| Tumor necrosis factor receptor superfamily, member 17          | BG183381 |      |      | 1,95 | 2,07 |      |      |  |  |
| Src family associated phosphoprotein 1                         | BG183963 |      |      | 1,99 | 1,09 |      |      |  |  |
| Mitochondrial ribosomal protein L3                             | BG185576 |      |      |      |      | 2,27 | 0,49 |  |  |
| Formin-like 1                                                  | BG235961 |      |      |      |      | 1,93 | 0,66 |  |  |
| Prostatic binding protein                                      | BG252637 | 1,96 | 4,95 | 2,56 | 0,59 | 3,03 | 0,49 |  |  |
| BCL2 binding component 3                                       | BG258126 |      |      | 2,09 | 1,09 | 1,97 | 0,66 |  |  |
| Phosphate cytidylyltransferase 1, choline, alpha               | BG260122 |      |      |      |      | 1,92 | 0,66 |  |  |
| Lysophospholipase                                              | BG287039 |      |      | 2,08 | 1,77 | 1,82 | 2,44 |  |  |
| Catalase                                                       | BG287806 |      |      | 1,81 | 2,66 | 1,89 | 0,66 |  |  |
| Methyltransferase like 3                                       | BG287883 |      |      | 2,00 | 1,09 | 2,31 | 0,49 |  |  |
| Insulin-like growth factor 2 receptor                          | BG325212 | 2,67 | 0,51 | 2,11 | 1,09 | 2,08 | 0,66 |  |  |
| Ras homolog gene family, member G (rho G)                      | BG338917 |      |      |      |      | 2,04 | 0,49 |  |  |
| Transcriptional adaptor 3 (NGG1 homolog)-like                  | BG389122 |      |      | 2,15 | 0,59 |      |      |  |  |
| Hydroxyacyl dehydrogenase, subunit 1                           | BG477867 |      |      |      |      | 1,91 | 2,44 |  |  |
| Translation initiation factor 3, subunit 2 beta                | BG484643 |      |      |      |      | 1,86 | 1,83 |  |  |
| ALL1-fused gene from chromosome 1q                             | BG498770 |      |      |      |      | 1,86 | 0,77 |  |  |
| Ubiquitin B                                                    | BG546472 |      |      | 2,02 | 1,98 | 2,01 | 0,49 |  |  |
| Serpin A3                                                      | BG567810 | 1,81 | 2,32 |      |      |      |      |  |  |
| Thyroid hormone receptor interactor 1C                         | BG575020 |      |      |      |      | 1,91 | 1,08 |  |  |
| Hermansky-Pudlak syndrome (HPS1)                               | BG576390 | 1,81 | 3,56 |      |      |      |      |  |  |
| Secretory carrier membrane protein 1                           | BG613898 | 1,97 | 1,55 |      |      |      |      |  |  |
| MHC class II, DQ beta 1                                        | BG619272 | 2,31 | 1,27 | 2,72 | 0,59 | 2,98 | 0,49 |  |  |
| Trinucleotide repeat containing 5                              | BG675987 |      |      | 1,93 | 2,30 | 1,81 | 3,16 |  |  |
| TNF receptor-associated factor 2                               | BG677004 |      |      | 1,91 | 2,30 |      |      |  |  |
| MCM7 minichromosome maintenance deficient 7                    | BG683250 |      |      | 2,33 | 1,09 | 2,14 | 0,66 |  |  |
| DiGeorge syndrome critical region gene 5                       | BG698445 |      |      | 2,10 | 1,09 | 1,89 | 1,42 |  |  |
| Ectonucleoside triphosphate diphosphohydrolase 1               | BG742963 |      |      |      |      | 2,20 | 0,49 |  |  |
| Tyrosine kinase, non-receptor, 2                               | BG742978 |      |      | 2,00 | 1,98 | 1,99 | 0,66 |  |  |
| Thyroid hormone-binding protein p5E                            | BG744516 |      |      |      |      | 1,83 | 1,83 |  |  |
| Ligase I, DNA, ATP-dependent                                   | BG744633 |      |      | 2,20 | 1,98 | 2,49 | 0,49 |  |  |
| Endoplasmic reticulum protein retention receptor 1 (KDELR1)    | BG745129 |      |      | 2,08 | 1,09 | 2,09 | 0,66 |  |  |
| Mitochondrial ribosomal protein S27                            | BG746580 |      |      |      |      | 1,96 | 0,66 |  |  |
| Cytochrome b-245, alpha polypeptide                            | BG751568 |      |      |      |      | 2,89 | 0,66 |  |  |
| Non-metastatic cells 1 (NM23A)                                 | BG753664 |      |      | 2,08 | 1,09 | 1,92 | 0,66 |  |  |
| Spi-B transcription factor (Spi-1/PU.1 related)                | BG754034 | 1,82 | 2,49 | 2,15 | 0,59 |      |      |  |  |
| T-cell leukemia/lymphoma 1A                                    | BG757974 | 2,13 | 0,51 | 1,94 | 1,98 |      |      |  |  |
| CD79A antigen (Ig-associated alpha)                            | BG759817 | 3,38 | 0,51 | 2,20 | 0,59 | 2,64 | 0,49 |  |  |
| T-cell leukemia/lymphoma 1A                                    | BG760057 | 3,72 | 0,51 | 2,38 | 0,59 | 2,14 | 0,49 |  |  |
| Vesicle amine transport protein 1 homolog                      | BG760616 |      |      | 2,07 | 1,20 |      |      |  |  |
| Gelsolin (amyloidosis, Finnish type)                           | BG763361 |      |      | 2,28 | 1,09 | 2,34 | 0,66 |  |  |
| Prohibitin 2                                                   | BG771222 |      |      |      |      | 1,81 | 1,23 |  |  |
| CD44 antigen                                                   | BG822701 | 1,80 | 3,23 |      |      |      |      |  |  |
| Ribosomal protein S6 kinase, 90kDa, polypeptide 1              | BG878337 |      |      | 1,93 | 1,76 | 2,23 | 0,49 |  |  |
| Lactoferrin                                                    | BI021407 |      |      | 2,00 | 1,20 |      |      |  |  |
| Translation elongation factor 1 gamma                          | BI084568 |      |      | 2,05 | 1,09 |      |      |  |  |
| Discs, large homolog 7                                         | BI087140 |      |      |      |      | 1,95 | 0,66 |  |  |
| Upstream binding transcription factor, RNA polymerase          | BI088564 |      |      | 2,01 | 1,98 | 2,46 | 0,49 |  |  |
| Fuse-binding protein-interacting repressor 1                   | BI197161 |      |      | 1,82 | 3,45 |      |      |  |  |
| O-6-methylguanine-DNA methyltransferase                        | BI225271 |      |      |      |      | 2,00 | 2,75 |  |  |
| Myosin IXB                                                     | BI255960 |      |      | 2,08 | 2,66 |      |      |  |  |
| Uracil-DNA glycosylase 2                                       | BI259616 | 2,73 | 0,51 | 3,19 | 0,59 | 1,99 | 0,66 |  |  |
| Procollagen C-endopeptidase enhancer 1                         | BI520001 | 2,06 | 2,49 |      |      |      |      |  |  |
| Lysosomal-associated membrane protein 2                        | BI549272 |      |      | 1,89 | 1,98 | 2,11 | 0,49 |  |  |
| Mesoderm specific transcript homolog                           | BI551502 |      |      |      |      | 2,15 | 0,66 |  |  |
| Riboflavin kinase                                              | BI752967 |      |      | 1,88 | 1,98 |      |      |  |  |
| Pre-B-cell leukemia transcription factor interacting protein 1 | BI754234 |      |      | 2,00 | 2,97 | 2,00 | 1,42 |  |  |
| Islet cell autoantigen 1                                       | BI824141 |      |      | 1,83 | 2,66 | 1,96 | 0,91 |  |  |
| Chemokine (C-C motif) ligand 21 (CCL21)                        | BI837774 | 5,32 | 0,51 | 3,47 | 0,59 |      |      |  |  |
| Sorting nexin 3                                                | BI856940 |      |      | 1,94 | 1,98 | 1,84 | 1,23 |  |  |
| Activating transcription factor 4                              | BI858594 |      |      | 1,82 | 2,66 | 2,13 | 0,49 |  |  |
| Cerebellar degeneration-related protein 1                      | BI869500 |      |      |      |      | 1,95 | 0,66 |  |  |
| Integrin beta 4 binding protein                                | BI908045 |      |      | 1,84 | 2,30 |      |      |  |  |
| Ig heavy constant mu                                           | BM008087 | 3,42 | 0,51 | 2,53 | 0,59 | 3,84 | 0,49 |  |  |
| Protein tyrosine phosphatase, non-receptor type 1              | BM015957 |      |      | 1,91 | 2,66 |      |      |  |  |
| Keratin 4                                                      | CAA30534 |      |      |      |      | 1,98 | 3,07 |  |  |
| Unnamed protein                                                | CAC21785 | 2,20 | 0,51 |      |      |      |      |  |  |
| Similar to Neutralized (Neu)                                   | CAC36018 |      |      |      |      | 2,08 | 0,49 |  |  |

|                                                              |        |      |      |       |      |      |      |
|--------------------------------------------------------------|--------|------|------|-------|------|------|------|
| Aminomethyltransferase (glycine cleavage system protein T    | D13811 |      | 1,92 | 2,30  |      |      |      |
| Peptidase (mitochondrial processing) alpha                   | D21064 |      |      |       | 1,94 | 3,72 |      |
| Actin filament associated protein                            | D25248 |      |      |       | 2,05 | 0,49 |      |
| L-isoaspartyl/D-aspartyl methyltransferase                   | D25545 | 1,82 | 2,66 |       | 1,97 | 0,91 |      |
| Kinesin family member 14                                     | D26361 |      |      |       | 2,04 | 0,49 |      |
| MCM7 minichromosome maintenance deficient 7                  | D28480 |      |      |       | 1,99 | 0,49 |      |
| Rho GTPase activating protein 2f                             | D29642 | 1,87 | 3,56 |       |      |      |      |
| Helicase with zinc finger                                    | D29677 |      |      | 1,95  | 1,98 |      |      |
| Basic transcription element binding protein 1                | D31716 | 3,56 | 0,51 | 4,03  | 0,59 | 2,46 | 0,49 |
| ADP-ribosylation factor-like 6 interacting protei            | D31885 |      |      |       |      | 1,99 | 1,23 |
| Thromboxane A2 receptor                                      | D38081 | 1,87 | 1,40 |       |      |      |      |
| Runt-related transcription factor 1                          | D43969 |      |      |       |      | 1,85 | 0,77 |
| Potassium inwardly-rectifying channel, subfamily J, member E | D50312 |      |      |       |      | 1,84 | 1,24 |
| KIAA0143 protein                                             | D63477 |      |      | 1,86  | 2,66 |      |      |
| KIAA0152 protein                                             | D63486 |      |      | 1,85  | 2,30 | 1,89 | 0,77 |
| SH2 domain binding protein 1                                 | D63875 |      |      |       |      | 1,86 | 1,24 |
| Calmeglin                                                    | D86322 |      |      | 1,88  | 2,30 |      |      |
| Melanoma associated gene                                     | D86983 | 1,94 | 2,49 |       |      |      |      |
| Ig lambda                                                    | D87023 | 2,09 | 0,51 | 2,65  | 0,59 | 2,09 | 0,66 |
| Solute carrier family 23 (nucleobase transporters), member 2 | D87075 |      |      |       |      | 1,88 | 0,77 |
| Paralemmin                                                   | D87460 |      |      | 1,84  | 2,66 | 1,94 | 0,77 |
| polymerase (RNA) II (DNA directed) polypeptide I             | F24474 |      |      | 2,07  | 1,09 | 1,95 | 0,66 |
| Interferon (alpha, beta and omega) receptor 1                | J03171 |      |      | 12,30 | 2,89 |      |      |
| Complement component receptor 2 (CD21)                       | J03565 | 3,00 | 0,51 |       |      |      |      |
| Annexin A5                                                   | J03745 |      |      |       |      | 1,97 | 0,66 |
| Cytochrome P450, subfamily XIX                               | J04127 | 1,85 | 4,43 |       |      |      |      |
| Interferon-inducible protein (9-27)                          | J04164 | 2,00 | 0,51 |       |      |      |      |
| 90 kD heat shock protein                                     | J04988 |      |      | 1,86  | 2,97 |      |      |
| Complement component 3                                       | K02765 | 2,94 | 0,51 | 2,16  | 1,09 | 2,05 | 0,49 |
| Protein kinase C, theta                                      | L01087 |      |      | 1,93  | 2,07 |      |      |
| RD RNA binding protein                                       | L03411 |      |      |       |      | 1,86 | 0,91 |
| Chemokine (C-C motif) receptor 7 (CCR7)                      | L08176 |      |      | 2,14  | 1,09 | 1,95 | 0,66 |
| Growth arrest-specific gene-1                                | L13698 | 1,81 | 4,95 |       |      |      |      |
| Tight junction protein 2                                     | L27476 |      |      |       |      | 2,29 | 0,49 |
| Cartilage oligomeric matrix protein                          | L32137 |      |      |       |      | 3,05 | 1,55 |
| Chemokine (C-X-C motif) ligand 12 (CXCL12)                   | L36033 |      |      | 1,95  | 3,45 |      |      |
| Hypothetical protein LOC162427                               | L38935 |      |      | 1,94  | 2,97 | 2,21 | 0,91 |
| ST8 alpha-N-acetyl-neuraminide alpha-2,8-sialyltransferase 4 | L41680 |      |      | 1,84  | 2,30 |      |      |
| Sialyltransferase 8A                                         | L43494 | 1,88 | 2,49 |       |      |      |      |
| Protein tyrosine phosphatase type IVA, member 2              | L48722 |      |      | 1,81  | 2,30 |      |      |
| FBJ murine osteosarcoma viral oncogene homolog E             | L49169 | 3,18 | 0,51 | 3,50  | 0,59 |      |      |
| Hydroxyprostaglandin dehydrogenase 15-(NAD                   | L76465 |      |      |       |      | 1,98 | 0,66 |
| Alpha-2-macroglobulin                                        | M11313 |      |      | 1,96  | 1,98 | 1,98 | 0,66 |
| Cerebellar degeneration-related protein                      | M16965 |      |      |       |      | 2,29 | 0,49 |
| Protein kinase, cAMP-dependent, regulatory, type I, alpha    | M18468 |      |      |       |      | 2,16 | 0,49 |
| Cytochrome b-245, alpha polypeptide                          | M21186 |      |      | 2,04  | 3,45 |      |      |
| MHC class I, E (HLA-E)                                       | M21533 |      |      | 2,16  | 4,60 | 2,24 | 3,07 |
| Guanine nucleotide-binding protein alpha-subunit gene        | M21740 |      |      | 1,95  | 1,76 |      |      |
| Kallikrein 3, (prostate specific antigen)                    | M21895 |      |      | 1,82  | 2,97 |      |      |
| Beta-hexosaminidase beta-subunit (HEXB) gene                 | M23294 |      |      | 1,87  | 2,30 |      |      |
| MHC class I (HLA-B13)                                        | M24041 |      |      |       |      | 2,58 | 0,66 |
| MHC class II, DQ beta 1                                      | M24364 | 2,13 | 0,51 | 1,97  | 4,75 | 1,89 | 0,86 |
| MHC class II, DQ beta 1                                      | M24364 |      |      | 2,18  | 0,59 | 2,05 | 0,49 |
| Interferon-induced protein with tetratricopeptide repeats    | M24594 | 2,65 | 0,51 |       |      |      |      |
| Chemokine (C-C motif) ligand 3 (CCL3)                        | M25315 | 1,97 | 1,40 | 2,02  | 2,30 |      |      |
| ATPase, Ca++ transporting, plasma membrane 4                 | M25874 |      |      | 1,88  | 1,98 | 2,52 | 0,49 |
| CD20 antigen (B-lymphocyte cell-surface antigen B1)          | M27394 | 1,98 | 4,43 | 2,23  | 0,59 | 2,18 | 0,49 |
| MHC class II, DP alpha 1                                     | M27487 |      |      | 1,82  | 2,30 | 2,74 | 0,49 |
| CD1a antigen                                                 | M28825 |      |      | 2,00  | 1,76 | 1,94 | 0,77 |
| XRCC5 DNA repair gene                                        | M30938 |      |      | 2,38  | 0,59 | 2,24 | 0,49 |
| Transcription factor 3 (Ig enhancer binding factors)         | M31523 |      |      | 2,25  | 0,59 | 1,81 | 1,23 |
| B-cell CLL/lymphoma 3                                        | M31732 | 1,92 | 3,23 | 1,84  | 2,89 |      |      |
| Alpha-2-macroglobulin                                        | M36501 |      |      | 1,87  | 2,30 |      |      |
| Macrophage-specific colony-stimulating factor (CSF-1)        | M37435 |      |      |       |      | 2,08 | 1,83 |
| H2A histone family, member Z                                 | M37583 |      |      |       |      | 2,00 | 0,66 |
| Ribosomal protein S4, Y-linked 1                             | M58459 |      |      | 1,97  | 2,30 | 2,15 | 0,49 |
| CD63 antigen (melanoma 1 antigen)                            | M58485 |      |      | 2,20  | 1,09 | 2,02 | 1,23 |



|                                                          |           |      |      |      |      |      |      |
|----------------------------------------------------------|-----------|------|------|------|------|------|------|
| Retinal degeneration, slow                               | M62958    |      |      | 2,44 | 1,76 |      |      |
| Ig kappa chain variable region (IGKV gene                | M63438    | 2,17 | 0,51 | 2,99 | 0,59 | 2,29 | 0,49 |
| Ig kappa chain variable region (IGKV gene                | M63438    | 2,63 | 0,51 | 3,43 | 0,59 | 2,11 | 0,49 |
| Flavin containing monooxygenase 1                        | M64082    |      |      | 1,84 | 2,66 | 1,87 | 0,91 |
| Protein tyrosine phosphatase, non-receptor type 7        | M64322    |      |      |      |      | 1,81 | 1,93 |
| Steroid-5-alpha-reductase, alpha polypeptide 1           | M74047    |      |      |      |      | 1,93 | 0,77 |
| TB1 gene                                                 | M74089    | 1,82 | 3,23 |      |      |      |      |
| CD79B antigen (Ig-associated beta 1)                     | M80461    | 1,90 | 3,23 |      |      |      |      |
| CD79B antigen (Ig-associated beta 2)                     | M80461    | 2,02 | 2,32 |      |      |      |      |
| Early growth response 1                                  | M80583    |      |      | 2,26 | 0,59 |      |      |
| AHNAK nucleoprotein (desmoyokin)                         | M80899    |      |      | 1,86 | 2,07 |      |      |
| E74-like factor 1 (ets domain transcription factor)      | M82882    |      |      |      |      | 1,94 | 0,66 |
| E74-like factor 1 (ets domain transcription factor)      | M82882    |      |      | 1,97 | 1,09 | 2,02 | 0,49 |
| CD19 antigene                                            | M84371    | 2,63 | 0,51 | 1,99 | 2,97 | 1,88 | 1,08 |
| Connexin 26 (GJB2)                                       | M86849    |      |      | 2,26 | 0,59 | 2,93 | 0,49 |
| Ig lambda locus                                          | M87790    |      |      |      |      | 1,95 | 0,66 |
| DNA-binding protein (ZNF)                                | M88363    |      |      | 2,13 | 2,30 |      |      |
| Zinc finger transcriptional regulator (GOS24) gene       | M92844    | 2,12 | 1,40 |      |      |      |      |
| Zinc finger transcriptional regulator (GOS24) gene       | M92844    | 2,41 | 0,51 | 3,06 | 0,59 | 2,25 | 0,49 |
| Capping protein (actin filament), gelsolin-like          | M94345    |      |      | 1,84 | 2,66 |      |      |
| Calnexin                                                 | M94859    |      |      | 1,92 | 2,30 | 1,98 | 0,77 |
| Purine-rich element binding protein A                    | M96684    | 2,07 | 4,06 |      |      |      |      |
| GOS19-3 gene                                             | M96852    | 2,45 | 0,51 |      |      |      |      |
| Keratin 2A                                               | NM_000423 |      |      |      |      | 2,59 | 2,86 |
| Galactosamine (N-acetyl)-6-sulfate sulfatase             | NM_000512 |      |      | 1,98 | 1,76 | 1,83 | 0,91 |
| Adenosine A3 receptor                                    | NM_000677 | 1,94 | 1,55 |      |      |      |      |
| Activin A receptor, type IIE                             | NM_001106 |      |      | 1,86 | 3,78 |      |      |
| Alkaline phosphatase, intestina                          | NM_001631 |      |      |      |      | 6,40 | 2,00 |
| FK506-binding protein 4 (59kD)                           | NM_002014 |      |      | 1,81 | 2,97 |      |      |
| Guanylate binding protein 1 (interferon-inducible)       | NM_002053 | 2,50 | 0,51 |      |      |      |      |
| Interleukin 13                                           | NM_002188 |      |      |      |      | 1,99 | 0,66 |
| Solute carrier family 34 (sodium phosphate), member 1    | NM_003052 |      |      | 1,96 | 2,30 |      |      |
| Transcription factor 7 (T-cell specific, HMG-box)        | NM_003202 |      |      |      |      | 1,88 | 1,42 |
| Zinc finger protein 177                                  | NM_003451 | 3,63 | 0,51 | 3,45 | 0,59 | 3,70 | 0,49 |
| O-linked N-acetylglucosamine (GlcNAc) transferase        | NM_003605 |      |      |      |      | 1,92 | 1,83 |
| Diacylglycerol kinase, epsilon                           | NM_003647 |      |      | 1,87 | 2,97 |      |      |
| CD84 antigen (leukocyte antigen)                         | NM_003874 |      |      |      |      | 2,08 | 0,49 |
| Airway trypsin-like protease                             | NM_004262 | 2,55 | 0,51 |      |      |      |      |
| Forkhead box A3                                          | NM_004497 |      |      | 1,87 | 2,89 |      |      |
| Angiotensin receptor 1                                   | NM_004835 | 1,95 | 0,51 |      |      |      |      |
| RNA binding motif protein, Y-linked, family 1, member A1 | NM_005058 | 2,08 | 0,51 |      |      |      |      |
| Solute carrier family 15, member 1                       | NM_005073 | 1,95 | 2,49 |      |      |      |      |
| ROD1 regulator of differentiation 1                      | NM_005156 |      |      | 1,88 | 2,89 | 2,24 | 0,49 |
| Nuclear receptor coactivator 4                           | NM_005437 |      |      |      |      | 1,86 | 0,91 |
| Hexamethylene bis-acetamide inducible 1                  | NM_006460 |      |      |      |      | 1,91 | 0,86 |
| Serologically defined colon cancer antigen 1             | NM_006643 |      |      | 1,84 | 3,45 |      |      |
| Protein disulfide isomerase                              | NM_006849 | 1,91 | 1,40 |      |      |      |      |
| Leukocyte Ig-like receptor, subfamily B, member 3        | NM_006864 |      |      | 1,85 | 2,97 |      |      |
| Presenilin 2 (Alzheimer disease 4)                       | NM_012486 |      |      | 1,87 | 2,07 |      |      |
| Vinculin                                                 | NM_014000 |      |      |      |      | 1,83 | 1,42 |
| SAC1 suppressor of actin mutations 1-like                | NM_014016 |      |      |      |      | 2,04 | 0,49 |
| Solute carrier family 6, member 7                        | NM_014228 |      |      | 1,89 | 2,07 |      |      |
| KIAA0101 protein                                         | NM_014736 |      |      |      |      | 1,96 | 0,66 |
| Mitochondrial ribosomal protein L19                      | NM_014763 |      |      |      |      | 2,56 | 1,55 |
| Proteasome 26S subunit, non-ATPase, epsilon              | NM_014814 |      |      |      |      | 1,82 | 1,42 |
| Defensin, alpha 5, Paneth cell-specific                  | NM_021010 |      |      | 1,98 | 1,76 |      |      |
| ELK4, ETS-domain protein (SRF accessory protein 1)       | NM_021795 | 1,98 | 1,27 |      |      |      |      |
| Hypothetical protein FLJ13868                            | NM_022744 |      |      | 1,87 | 2,07 | 1,92 | 0,77 |
| Potassium channel tetramerisation domain containing 17   | NM_024681 |      |      | 2,15 | 1,09 | 1,92 | 1,83 |
| SWI/SNF complex, subfamily a, member 2                   | R56503    | 1,94 | 4,95 | 2,06 | 1,76 | 2,01 | 1,43 |
| Ig kappa constant                                        | S49006    | 2,45 | 0,51 |      |      |      |      |
| Ig kappa chain V-IV region B17 precursor                 | S50732    | 2,47 | 0,51 |      |      |      |      |
| Guanylate cyclase 2C                                     | S57551    | 2,03 | 1,27 |      |      |      |      |
| Microseminoprotein, beta-2                               | S67815    |      |      | 47,3 | 2,30 |      |      |
| Natural killer cell group 7 sequence                     | S69115    | 1,89 | 1,40 |      |      | 1,92 | 0,77 |
| E2F transcription factor 4, p107/p130-binding            | S75174    |      |      | 1,90 | 1,77 | 1,83 | 0,86 |
| Integrin beta 7 subunit                                  | S80335    | 1,95 | 4,06 |      |      |      |      |

|                                                              |        |      |      |      |      |      |      |
|--------------------------------------------------------------|--------|------|------|------|------|------|------|
| Calponin 3, acidic                                           | S80562 |      |      |      |      | 1,97 | 0,66 |
| Prohibitin                                                   | S85655 |      |      | 2,99 | 3,78 |      |      |
| Isoleucyl-tRNA synthetase                                    | U04953 | 2,25 | 2,99 |      |      |      |      |
| Fas ligand                                                   | U08137 | 2,26 | 0,51 |      |      |      |      |
| Thymopoietin                                                 | U09088 |      |      |      |      | 2,00 | 0,66 |
| Defensin-related pseudogene sequence                         | U10267 | 2,44 | 4,95 | 1,87 | 3,78 |      |      |
| Ankyrin 3, node of Ranvier (ankyrin G)                       | U13616 |      |      | 1,85 | 2,30 |      |      |
| Bak-2                                                        | U16812 |      |      | 1,95 | 2,30 |      |      |
| RAR-related orphan receptor C                                | U16997 |      |      | 1,94 | 2,89 | 1,88 | 2,86 |
| Suppression of tumorigenicity 13 (Hsp70 interacting protein) | U17714 |      |      | 1,87 | 1,98 |      |      |
| G protein-coupled receptor 3                                 | U18550 |      |      | 1,93 | 2,30 |      |      |
| Baculoviral IAP repeat-containing 1                          | U19251 |      |      | 2,06 | 1,09 | 1,99 | 0,66 |
| Radical fringe homolog                                       | U20285 |      |      | 2,52 | 0,59 | 1,88 | 1,24 |
| Transcription factor junB (junB)                             | U20734 | 2,94 | 0,51 | 2,26 | 1,09 | 2,16 | 0,66 |
| Microtubule-associated protein, RP/EB family, member 1       | U24166 |      |      |      |      | 1,92 | 0,77 |
| Laminin gamma2 chain (LAMC2)                                 | U31200 |      |      | 1,83 | 3,78 |      |      |
| Transglutaminase 4 (prostate)                                | U31905 |      |      |      |      | 4,91 | 0,77 |
| Peptidylprolyl isomerase (cyclophilin)-like 3                | U37221 |      |      | 2,31 | 3,45 |      |      |
| Zinc finger protein 211                                      | U38904 |      |      | 2,02 | 1,09 | 1,87 | 1,43 |
| Zinc finger protein, subfamily 1A, 1 (Ikeros)                | U40462 |      |      |      |      | 1,82 | 1,83 |
| Rho-associated, coiled-coil containing protein kinase 1      | U43195 |      |      | 1,84 | 2,89 |      |      |
| Breast cancer cytosolic NADP(+)-dependent malic enzyme       | U43944 | 1,81 | 2,49 |      |      |      |      |
| SMAD, mothers against DPP homolog 4                          | U44378 |      |      |      |      | 1,90 | 1,23 |
| GOK (STIM1)                                                  | U52426 |      |      |      |      | 1,83 | 0,86 |
| Potassium channel beta subunit                               | U61537 |      |      | 2,47 | 0,59 |      |      |
| ST3 beta-galactoside alpha-2,3-sialyltransferase 3           | U63090 |      |      | 2,00 | 1,98 |      |      |
| CSF-1 receptor (FMS)                                         | U63963 | 1,96 | 2,49 |      |      | 1,96 | 0,66 |
| SWI/SNF complex subfamily c, member 1                        | U66615 | 1,89 | 2,99 | 2,07 | 1,09 | 2,28 | 1,83 |
| Copper transport protein HAH1 (HAH1)                         | U70660 |      |      | 2,17 | 0,59 | 1,81 | 1,24 |
| Phospholemman chloride channel                               | U72245 | 1,80 | 3,23 | 1,96 | 1,98 | 1,91 | 0,77 |
| BTK, GLA, L44L and FTP3 genes                                | U78027 |      |      | 1,80 | 2,66 |      |      |
| Thioredoxin 2                                                | U78678 |      |      | 2,03 | 1,09 | 1,82 | 1,23 |
| MHC class II, DQ beta 1                                      | U83582 |      |      | 1,98 | 1,77 | 2,03 | 0,66 |
| Inositol polyphosphate-5-phosphatase                         | U84400 |      |      |      |      | 2,02 | 1,08 |
| Olfactory receptor (OR7-86) pseudogene                       | U86282 | 1,96 | 3,56 |      |      |      |      |
| Chromosome 11 open reading frame 32                          | U90916 |      |      |      |      | 2,30 | 0,49 |
| Hereditary haemochromatosis region                           | U91328 |      |      | 1,82 | 3,78 |      |      |
| Gamma-aminobutyric acid (GABA) A receptor, pi subunit        | U95367 | 1,86 | 2,99 |      |      |      |      |
| TBP-associated factor, RNA polymerase II 28kDa (TAF11)       | W63567 |      |      | 2,30 | 0,59 | 2,04 | 0,49 |
| MHC class II, DQ alpha 2                                     | X00033 | 2,23 | 0,51 |      |      | 2,05 | 0,77 |
| Retinol binding protein (RBP)                                | X00129 | 2,11 | 1,40 |      |      |      |      |
| * MHC class II alpha chain gene DZ-alpha                     | X02882 | 2,04 | 0,51 |      |      |      |      |
| Complement component 2                                       | X04481 | 2,20 | 0,51 |      |      |      |      |
| Amylase, alpha 2B; pancreatic                                | X07057 |      |      |      |      | 2,56 | 1,83 |
| Abhydrolase domain containing 2                              | X12433 |      |      | 2,12 | 1,09 |      |      |
| Interleukin 6 receptor                                       | X12830 | 2,77 | 0,51 |      |      | 2,01 | 0,66 |
| Casein kinase 2, beta polypeptide                            | X16312 |      |      | 1,80 | 3,45 |      |      |
| Actin, gamma 2, smooth muscle, enteric                       | X16940 |      |      |      |      | 2,21 | 2,86 |
| Integrin, beta 4                                             | X51841 |      |      |      |      | 6,53 | 2,00 |
| Lymphocyte-activation gene 3                                 | X51985 | 2,03 | 2,32 |      |      |      |      |
| Lymphocyte-activation gene 3                                 | X51985 | 2,62 | 0,51 |      |      |      |      |
| Five-lipoxygenase activating protein (FLAP)                  | X52195 |      |      | 1,88 | 2,30 |      |      |
| Killer cell lectin-like receptor subfamily C, member 1       | X54867 |      |      | 1,92 | 2,30 |      |      |
| Upstream transcription factor 1                              | X55666 |      |      | 1,85 | 2,97 |      |      |
| NODAL modulator 3                                            | X57398 | 1,84 | 4,43 |      |      | 2,01 | 0,66 |
| Ig lambda constant 2                                         | X57812 | 1,88 | 0,51 | 2,18 | 1,09 |      |      |
| Ig lambda constant 2                                         | X57812 | 1,99 | 0,51 | 2,20 | 4,43 |      |      |
| Cyclin D1                                                    | X59798 |      |      | 1,92 | 1,98 | 1,92 | 0,91 |
| CD9 antigen                                                  | X60111 |      |      |      |      | 1,91 | 0,66 |
| Activin A receptor, type II                                  | X63128 | 1,85 | 1,55 |      |      |      |      |
| Early growth response 3                                      | X63741 | 1,80 | 1,27 | 2,04 | 1,09 | 1,85 | 1,08 |
| Nucleoporin                                                  | X64228 |      |      |      |      | 2,20 | 0,49 |
| Spi-B transcription factor (Spi-1/PU.1 related)              | X66079 | 2,30 | 0,51 |      |      |      |      |
| Interferon, alpha-inducible protein 27 (ISG12)               | X67325 |      |      |      |      | 1,87 | 0,77 |
| Contactin 2 (axonal)                                         | X67734 |      |      | 17,0 | 1,09 |      |      |
| Isocitrate dehydrogenase 2 (NADP+), mitochondria             | X69433 |      |      | 1,91 | 2,30 | 1,89 | 0,77 |
| Mitochondrial ATP synthase c subunit (P1 form)               | X69907 |      |      | 2,06 | 1,09 |      |      |

|                                                       |        |      |      |      |      |      |      |  |  |
|-------------------------------------------------------|--------|------|------|------|------|------|------|--|--|
| Son-pseudogene                                        | X71604 |      |      | 1,82 | 2,30 |      |      |  |  |
| Retinoblastoma binding protein 7                      | X72841 |      |      |      |      | 2,14 | 0,49 |  |  |
| Id3 gene for HLH type transcription factor            | X73428 |      |      |      |      | 1,93 | 0,77 |  |  |
| Mannose phosphate isomerase                           | X76057 |      |      | 2,13 | 1,98 |      |      |  |  |
| Zinc finger protein 345                               | X78933 |      |      | 1,98 | 2,30 | 1,93 | 0,66 |  |  |
| Connective tissue growth factor                       | X78947 |      |      | 1,92 | 1,76 |      |      |  |  |
| TPM3R1 DNA sequence                                   | X79909 |      |      | 2,01 | 1,09 |      |      |  |  |
| Archain 1                                             | X81198 |      |      |      |      | 1,91 | 0,66 |  |  |
| Staf50                                                | X82200 | 2,06 | 2,32 | 2,11 | 1,09 | 2,26 | 0,49 |  |  |
| Zinc finger, MYND domain containing 11                | X86098 |      |      | 2,09 | 1,20 |      |      |  |  |
| Chromosome 16 open reading frame 35                   | X90857 |      |      | 1,89 | 2,30 |      |      |  |  |
| CYP2D7-CYP2D6 intergenic region                       | X90926 | 1,95 | 0,51 | 2,11 | 1,09 |      |      |  |  |
| Sine oculis homeobox homolog 1                        | X91868 |      |      |      |      | 1,98 | 0,66 |  |  |
| Adaptor-related protein complex 2, sigma 1 subunit    | X97074 |      |      |      |      | 1,89 | 0,91 |  |  |
| Metallothionein 1L                                    | X97261 |      |      | 1,90 | 2,30 |      |      |  |  |
| Nuclear protein SDK3                                  | Y10351 |      |      |      |      | 1,98 | 0,66 |  |  |
| Ig kappa light chain                                  | Y14736 | 2,28 | 0,51 |      |      | 1,98 | 0,66 |  |  |
| Ig lambda light chain                                 | Y14738 | 2,32 | 0,51 | 2,46 | 0,59 | 2,33 | 0,49 |  |  |
| Ig lambda light chain                                 | Y14738 | 1,94 | 0,51 | 2,20 | 1,09 |      |      |  |  |
| Selenoprotein P, plasma, 1                            | Z11793 |      |      | 2,13 | 1,76 |      |      |  |  |
| Translation elongation factor 1 delta                 | Z21507 |      |      |      |      | 2,45 | 2,00 |  |  |
| Tumor necrosis factor receptor superfamily, member 17 | Z29575 |      |      | 1,90 | 3,45 |      |      |  |  |
| Early lymphocyte activation antigen CD69              | Z30428 |      |      | 1,86 | 2,30 |      |      |  |  |
| Ras homolog gene family, member I                     | Z35227 |      |      |      |      | 2,30 | 0,49 |  |  |
| Ig kappa chain V-IV region B17 precursor              | Z46347 | 2,56 | 0,51 | 1,97 | 1,76 | 2,02 | 0,49 |  |  |
| PRM1, PRM2, PRM3, TNP2 and SOCS-1                     | Z46940 |      |      |      |      | 1,81 | 1,08 |  |  |
| CpG island DNA genomic Mse1 fragment                  | Z56162 |      |      | 3,27 | 1,77 |      |      |  |  |
| Mitochondrial ribosomal protein S31                   | Z68747 |      |      |      |      | 1,82 | 1,42 |  |  |
| Clone ICRFp50711077                                   | Z69892 | 2,02 | 0,51 | 1,85 | 2,30 | 2,16 | 0,49 |  |  |
| Plakophilin 1                                         | Z73678 |      |      | 2,57 | 2,66 |      |      |  |  |
| Ig heavy chain variable region                        | Z98733 | 2,80 | 3,23 | 2,79 | 0,59 | 2,55 | 0,49 |  |  |
| Incyte EST                                            | -      | 2,18 | 0,51 | 2,11 | 1,09 | 2,11 | 0,49 |  |  |
| Incyte EST                                            | -      | 2,22 | 2,49 |      |      | 2,04 | 0,49 |  |  |
| Incyte EST                                            | -      |      |      | 1,86 | 3,78 |      |      |  |  |
| Incyte EST                                            | -      |      |      | 1,86 | 2,89 |      |      |  |  |
| Incyte EST                                            | -      |      |      | 1,84 | 3,45 |      |      |  |  |
| Incyte EST                                            | -      |      |      |      |      | 1,83 | 1,23 |  |  |
| Incyte EST                                            | -      |      |      |      |      | 2,20 | 0,66 |  |  |
| Incyte EST                                            | -      |      |      |      |      | 1,90 | 0,91 |  |  |

Asterics indicate genes with an average signal intensity under 1.5 the average signal intensity of the background signal in non-MG adult

**Table S2: List of 736 genes down-regulated in MH, ML and SN patients**

These genes were extracted by SAM with a False Discovery Rate&lt;5% and a FC&gt;1,8.

| Name                                                     | GenBank  | MH    |      | ML    |      | SN    |      |
|----------------------------------------------------------|----------|-------|------|-------|------|-------|------|
|                                                          |          | FC    | FDR  | FC    | FDR  | FC    | FDR  |
| Protein tyrosine phosphatase, receptor type, N           | AA281524 | -1,88 | 1,55 |       |      |       |      |
| Retinoic acid receptor responder 1                       | AA418256 |       |      | -2,07 | 2,66 | -2,68 | 0,77 |
| KIAA0103 protein                                         | AA447703 |       |      |       |      | -1,99 | 1,08 |
| Rap guanine nucleotide exchange factor (GEF) 3           | AA453498 |       |      |       |      | -1,81 | 1,93 |
| Transcription elongation factor B, polypeptide 1         | AA521128 |       |      | -1,96 | 2,89 |       |      |
| Mitochondrial intermediate peptidase                     | AA524277 |       |      |       |      | -1,99 | 0,91 |
| Chromosome 1 open reading frame 15E                      | AA594756 |       |      |       |      | -2,00 | 0,91 |
| BCL2-associated athanogene                               | AA628507 |       |      | -2,18 | 0,59 | -1,99 | 0,77 |
| General transcription factor IIH, polypeptide 2, 44kDa   | AA676310 |       |      | -2,07 | 1,76 | -2,07 | 0,77 |
| Transcribed locus                                        | AA843678 |       |      | -1,80 | 4,43 |       |      |
| Tudor domain containing 9                                | AA844124 |       |      |       |      | -1,91 | 1,06 |
| Arginine-rich, mutated in early stage tumors             | AA974308 | -1,83 | 2,32 |       |      |       |      |
| RNA polymerase I transcription factor RRN3               | AA977114 |       |      |       |      | -2,10 | 0,77 |
| Myosin, heavy polypeptide 1A                             | AAA48988 |       |      |       |      | -1,92 | 1,08 |
| Pax-6                                                    | AAB32671 | -1,92 | 2,49 |       |      | -1,86 | 1,55 |
| Potassium channel                                        | AAC61520 |       |      |       |      | -1,98 | 0,91 |
| Olfactory receptor                                       | AAC64584 |       |      |       |      | -2,05 | 2,75 |
| Layilin                                                  | AAC68695 |       |      | -1,97 | 2,66 |       |      |
| Bing1                                                    | AAC69892 | -1,86 | 1,40 |       |      |       |      |
| Polyhomeotic 2                                           | AAD00519 |       |      |       |      | -1,80 | 1,24 |
| Similar to beta-transducins                              | AAD17343 |       |      | -1,90 | 3,78 |       |      |
| Ubx4 protein                                             | AAH04632 | -1,89 | 3,56 | -2,19 | 2,07 | -2,58 | 0,77 |
| Dynein, axonemal, heavy polypeptide 1                    | AAK60620 |       |      |       |      | -1,81 | 1,43 |
| Nephronectin (Neph1)                                     | AAK84392 |       |      | -2,11 | 2,07 |       |      |
| KIAA0317 protein                                         | AB002315 |       |      | -1,82 | 4,75 | -1,84 | 1,43 |
| Talin 2                                                  | AB002318 |       |      |       |      | -1,88 | 1,24 |
| Death associated transcription factor 1                  | AB002331 | -2,28 | 0,51 | -2,03 | 1,77 |       |      |
| Sal-like 2                                               | AB002358 |       |      | -1,95 | 3,78 |       |      |
| Ectonucleoside triphosphate diphosphohydrolase 1         | AB002390 | -1,98 | 0,51 | -2,11 | 1,76 |       |      |
| Peroxisome proliferative activated receptor, gamma       | AB005526 |       |      |       |      | -2,69 | 0,77 |
| SRY (sex determining region Y)-box 15 (Sox15)            | AB006867 |       |      |       |      | -1,94 | 0,91 |
| Phosphoinositide-binding protein PIP3-E                  | AB007863 |       |      | -2,20 | 0,59 |       |      |
| Heat shock 70kDa protein 12A                             | AB007877 |       |      |       |      | -2,11 | 0,77 |
| Zinc finger protein 262                                  | AB007885 | -2,10 | 2,32 | -2,08 | 2,97 | -1,85 | 1,93 |
| Zinc finger protein 262                                  | AB007885 |       |      | -1,82 | 4,43 |       |      |
| Zinc finger and BTB domain containing 24                 | AB007901 |       |      | -3,67 | 0,59 | -2,57 | 2,75 |
| KIAA0492 protein                                         | AB007961 |       |      |       |      | -2,28 | 0,77 |
| KIAA0527 protein                                         | AB011099 |       |      | -1,97 | 2,07 |       |      |
| Zinc finger protein 292                                  | AB011102 | -1,88 | 2,32 | -2,30 | 0,59 | -2,39 | 0,77 |
| NUAK family, SNF1-like kinase, 1                         | AB011109 |       |      |       |      | -2,12 | 0,77 |
| Thioredoxin domain containing 4 (endoplasmic reticulum)  | AB011145 |       |      | -2,16 | 1,98 |       |      |
| Phosphatidylinositol-4-phosphate 5-kinase, type I, gamma | AB011161 |       |      | -2,01 | 2,07 |       |      |
| Alkaline phosphatase, liver/bone/kidney                  | AB011406 |       |      | -2,42 | 1,76 |       |      |
| Serine/threonine kinase 17b (apoptosis-inducing)         | AB011421 |       |      | -2,45 | 0,59 |       |      |
| Cullin 4B                                                | AB014595 | -1,94 | 2,49 |       |      |       |      |
| Kelch-like 18                                            | AB018338 |       |      |       |      | -1,92 | 1,42 |
| Cold shock domain containing E1, RNA-binding             | AB020692 |       |      |       |      | -2,08 | 0,77 |
| WD repeat domain 47                                      | AB020700 |       |      |       |      | -1,82 | 1,42 |
| KIAA0895 protein                                         | AB020702 | -1,95 | 1,55 |       |      | -2,19 | 0,77 |
| Dynein, axonemal, heavy polypeptide 1                    | AB023161 |       |      | -2,18 | 2,97 |       |      |
| WD repeat domain 37                                      | AB023199 |       |      | -1,94 | 3,79 |       |      |
| Beta-3-galactosyltransferase 4                           | AB026730 |       |      | -1,93 | 2,07 |       |      |
| Bromodomain adjacent to zinc finger domain, 1E           | AB032253 |       |      | -1,86 | 2,89 | -1,97 | 0,77 |
| HECT domain containing 1                                 | AB032957 |       |      |       |      | -1,82 | 1,83 |
| Protein Z, vitamin K-dependent plasma glycoprotein       | AB033749 |       |      |       |      | -1,83 | 2,25 |
| Sorbin and SH3 domain containing 1                       | AB037717 |       |      | -1,97 | 2,66 |       |      |
| Mucin 3A, intestinal                                     | AB038781 |       |      |       |      | -2,11 | 0,77 |
| Amyotrophic lateral sclerosis 2, candidate 2             | AB038950 |       |      | -5,67 | 1,98 | -4,39 | 2,75 |
| Myosin, heavy polypeptide 7B, cardiac muscle, beta       | AB040945 |       |      |       |      | -1,81 | 1,66 |
| Zinc finger and BTB domain containing 26                 | AB046792 |       |      |       |      | -2,79 | 0,77 |

|                                                       |          |       |      |       |       |       |      |
|-------------------------------------------------------|----------|-------|------|-------|-------|-------|------|
| Chromosome 20 open reading frame 23                   | AB046810 |       |      |       |       | -2,06 | 0,77 |
| Clone QnpA-15275                                      | AB047901 |       |      |       |       | -1,83 | 1,23 |
| Clone QnpA-16545                                      | AB049838 | -2,39 | 0,51 |       |       | -1,84 | 1,43 |
| Clone QnpA-20858                                      | AB050409 |       |      |       |       | -1,82 | 1,24 |
| Cytoplasmic polyadenylation element binding protein   | AB051460 |       |      |       |       | -1,85 | 1,08 |
| Dual specificity phosphatase 1E                       | AB051487 |       |      | -2,57 | 4,43  | -2,45 | 2,00 |
| Kinesin family member 21A                             | AB051495 |       |      |       |       | -2,26 | 0,77 |
| Zinc finger protein 436                               | AB051497 |       |      | -2,02 | 2,07  | -1,91 | 1,08 |
| 3-oxo acid CoA transferase 1 (Scot-t)                 | AB052900 |       |      |       |       | -1,93 | 4,96 |
| Guanine nucleotide exchange factor Lbc                | AB055890 |       |      |       |       | -2,08 | 0,86 |
| Clone QnpA-11220                                      | AB056347 |       |      |       |       | -1,89 | 1,08 |
| Zinc finger, CCCH-type with G patch domain            | AB058750 | -1,97 | 2,32 |       |       |       |      |
| Syntenin                                              | AF000652 | -1,90 | 2,32 |       |       |       |      |
| Type II integral membrane protein (NKG2-D)            | AF001298 |       |      |       |       | -2,04 | 0,86 |
| Protein tyrosine phosphatase, non-receptor type 2:    | AF001846 |       |      | -1,99 | 2,07  |       |      |
| Niemann-Pick disease, type C1                         | AF002020 |       |      | -2,47 | 0,59  |       |      |
| Syntaxin binding protein 1                            | AF004563 |       |      | -2,28 | 2,66  |       |      |
| Insulin receptor substrate 3-like                     | AF015042 |       |      |       |       | -2,23 | 0,77 |
| Fucose-1-phosphate guanylyltransferase                | AF017445 | -2,22 | 0,51 | -2,29 | 0,59  | -2,72 | 0,77 |
| Heparan sulfate (glucosamine) 3-O-sulfotransferase 1  | AF019386 |       |      |       |       | -1,95 | 0,91 |
| Secreted frizzled-related protein 4                   | AF026692 |       |      |       |       | -1,95 | 0,86 |
| Mannosidase, alpha, class 1A, member 2                | AF027156 | -1,84 | 2,49 | -2,03 | 2,07  |       |      |
| Chloride channel 3                                    | AF029346 |       |      |       |       | -1,91 | 1,08 |
| Hepatitis B virus x interacting proteir               | AF029890 |       |      | -2,06 | 1,77  |       |      |
| Cystatin F (leukocystatin)                            | AF031824 |       |      |       |       | -1,83 | 1,24 |
| Small nuclear RNA activating complex, polypeptide     | AF032387 |       |      |       |       | -2,07 | 3,75 |
| Interleukin 15 receptor, alpha                        | AF035279 |       |      | -1,84 | 3,79  |       |      |
| Regulator of G-protein signalling 14                  | AF037195 | -2,03 | 1,27 |       |       | -1,87 | 1,24 |
| Hydroxyacyl-Coenzyme A dehydrogenase, type            | AF037438 |       |      |       |       | -1,84 | 1,43 |
| Clone 23728                                           | AF038199 | -1,84 | 2,32 | -2,02 | 2,07  |       |      |
| Hairless homolog                                      | AF039196 |       |      |       |       | -1,98 | 1,23 |
| Olfactory receptor and MYLK genes                     | AF042089 |       |      | -1,90 | 2,97  |       |      |
| Tumor necrosis factor (ligand) superfamily, member 12 | AF046888 |       |      |       |       | -2,18 | 1,66 |
| Sel-1 suppressor of lin-12-like                       | AF052059 |       |      | -1,94 | 2,07  |       |      |
| Histone deacetylase 3 (HDAC3)                         | AF059650 | -2,04 | 0,51 |       |       |       |      |
| Zinc finger protein 145                               | AF060568 |       |      | -1,93 | 2,66  |       |      |
| Putative neuronal cell adhesion molecule              | AF063936 |       |      |       |       | -1,88 | 1,08 |
| Nonmetastatic protein 23, homolog 5                   | AF067724 |       |      |       |       | -1,80 | 4,13 |
| RAB2, member RAS oncogene family                      | AF070629 |       |      |       | -2,03 | 2,07  |      |
| G-protein-coupled receptor 75 (GPR75)                 | AF072693 | -1,98 | 2,32 |       |       |       |      |
| Myotubularin related protein 6                        | AF072928 |       |      |       |       | -1,90 | 1,24 |
| Solute carrier family 1, member 1                     | AF074906 |       |      |       |       | -2,15 | 0,91 |
| Pre-T-cell receptor alpha chain 1 precursor           | AF084941 | -2,24 | 0,51 |       |       |       |      |
| Zinc finger protein 641                               | AF086127 | -1,85 | 1,27 |       |       | -1,94 | 0,86 |
| Hypothetical protein LOC283337                        | AF086252 |       |      | -1,86 | 3,45  |       |      |
| ATP synthase, mitochondrial, F0 complex, subunit c    | AF087135 | -1,93 | 1,40 | -2,08 | 1,76  |       |      |
| NADH:ubiquinone oxidoreductase SDAP subuni            | AF087660 | -2,95 | 2,32 | -2,78 | 2,89  |       |      |
| TIA1 cytotoxic granule-associated RNA binding protei  | AF090093 | -1,82 | 1,55 |       |       |       |      |
| L-3-hydroxyacyl-CoA dehydrogenase, short chai         | AF095703 |       |      |       |       | -1,84 | 2,00 |
| Transcription elongation factor A (SII)-like 1        | AF095906 |       |      |       |       | -1,99 | 1,23 |
| WNT1 inducible signaling pathway protein 1            | AF100779 |       |      |       |       | -2,04 | 1,93 |
| Urotensin 2                                           | AF104118 |       |      |       |       | -1,81 | 1,42 |
| Clone BAC270M14 on chromosome 14q24.3                 | AF107885 |       |      |       |       | -2,01 | 1,24 |
| Signal sequence receptor, gamma                       | AF110647 | -1,93 | 1,27 | -2,12 | 0,59  | -2,05 | 0,77 |
| Kelch-like 7                                          | AF111113 |       |      |       |       | -2,00 | 0,91 |
| SPTLC2 and unknown genes                              | AF111168 |       |      |       |       | -2,42 | 1,24 |
| Integrin, alpha 10                                    | AF112345 |       |      |       |       | -3,05 | 4,13 |
| Y-linked zinc finger protein (ZFY)                    | AF114156 | -1,88 | 4,95 |       |       | -2,01 | 1,43 |
| Host cell factor C2                                   | AF117210 |       |      | -2,11 | 2,66  | -1,86 | 2,00 |
| Feline leukemia virus subgroup C cellular recepto     | AF118637 |       |      |       |       | -2,02 | 0,86 |
| Prepro-orexin (PPORX) gene                            | AF118885 |       |      |       |       | -2,03 | 3,75 |
| Smoothened homolog                                    | AF120103 |       |      | -2,05 | 2,89  |       |      |
| HECT domain containing 2                              | AF131793 |       |      |       |       | -2,10 | 1,83 |
| Proteoglycan 3                                        | AF132209 | -2,38 | 2,49 |       |       | -1,90 | 3,72 |
| Coenzyme Q6 homolog                                   | AF132944 |       |      |       |       | -2,05 | 2,86 |
| NF-E2-related factor 3 gene                           | AF135116 |       |      | -1,92 | 2,66  |       |      |
| Chemokine (C-C motif) receptor 9 (CCR9)               | AF145439 | -1,96 | 0,51 |       |       |       |      |

|                                                 |          |       |      |       |      |       |      |
|-------------------------------------------------|----------|-------|------|-------|------|-------|------|
| Solute carrier family 6, member 14              | AF151978 |       |      |       |      | -1,85 | 1,55 |
| IkappaBkinase complex-associated protein        | AF153419 | -4,36 | 3,23 | -4,62 | 1,76 | -5,15 | 0,77 |
| Paternally expressed 3                          | AF166122 |       |      |       |      | -1,86 | 1,93 |
| Activating signal cointegrator 1                | AF168418 | -1,96 | 1,40 |       |      |       |      |
| X 010 protein                                   | AF168711 | -2,04 | 1,27 |       |      |       |      |
| Mitochondrial carrier homolog 2                 | AF176008 | -2,30 | 0,51 | -2,12 | 1,76 | -2,12 | 0,77 |
| A-kinase anchoring protein 220                  | AF176555 | -2,12 | 2,49 |       |      | -2,04 | 1,43 |
| Sulfotransferase 1B2 gene                       | AF184894 |       |      |       |      | -2,08 | 2,75 |
| PI-3-kinase-related kinase SMG-1                | AF186377 |       |      |       |      | -2,06 | 4,15 |
| Filamin B, beta                                 | AF191629 |       |      |       |      | -1,91 | 1,08 |
| Endothelial differentiation gene 4 (EDG4)       | AF197929 |       |      | -1,88 | 4,43 |       |      |
| AT rich interactive domain 4B (RBP1-like)       | AF214114 |       |      | -1,81 | 4,43 |       |      |
| Tripartite motif-containing 34                  | AF220143 |       |      |       |      | -1,98 | 0,86 |
| MANBA and UBE2D3 genes                          | AF224669 |       |      | -2,01 | 2,07 |       |      |
| Tensin                                          | AF225896 |       |      |       |      | -2,91 | 0,77 |
| Tripartite motif-containing 29                  | AF230388 | -2,39 | 0,51 | -2,43 | 0,59 | -1,94 | 1,23 |
| ATPase, lysosomal accessory protein 2           | AF248966 |       |      | -2,19 | 1,76 |       |      |
| Chromosome 10 open reading frame 11             | AF267860 |       |      |       |      | -1,84 | 1,24 |
| Solute carrier family 21, member 3              | AF279784 |       |      |       |      | -2,14 | 3,07 |
| SP110 nuclear body protein                      | AF280094 |       |      | -1,80 | 4,43 | -1,87 | 1,08 |
| CHMP1.5 protein                                 | AF281064 | -2,29 | 0,51 | -1,80 | 4,43 | -1,84 | 1,23 |
| Homeobox B7, B6, B5, B4 and B3 genes            | AF287967 |       |      | -1,85 | 2,97 |       |      |
| Chromosome 12 open reading frame 1C             | AF289485 |       |      | -1,86 | 3,78 |       |      |
| Pumilio 2 (PUMH2)                               | AF315591 | -1,98 | 1,40 |       |      | -1,94 | 1,06 |
| Zinc finger protein 268                         | AF317549 |       |      | -1,87 | 4,43 |       |      |
| Actin cross-linking factor                      | AF317696 | -1,86 | 1,40 |       |      |       |      |
| GLIS family zinc finger 2                       | AF325914 |       |      |       |      | -2,19 | 0,77 |
| * <i>Plasmalemma vesicle associated protein</i> | AF326591 | -2,17 | 2,99 |       |      | -2,54 | 0,77 |
| NMDA receptor regulated 1                       | AF327722 | -1,94 | 1,40 |       |      |       |      |
| AFG3 ATPase family gene 3-like 1                | AF329692 |       |      |       |      | -1,88 | 1,06 |
| Dombrock blood group (DO)                       | AF340234 |       |      | -5,15 | 1,76 | -4,58 | 1,06 |
| Carboxypeptidase Iv                             | AF368463 |       |      |       |      | -1,86 | 1,66 |
| Interleukin 6 (interferon, beta 2)              | AF372214 |       |      |       |      | -2,53 | 0,77 |
| ZNFPHX133 protein                               | AF373036 |       |      | -1,95 | 2,66 |       |      |
| Cathepsin D (lysosomal aspartyl protease)       | AI031979 | -2,00 | 2,49 |       |      |       |      |
| Hypothetical protein LOC284591                  | AI130021 |       |      |       |      | -1,88 | 0,91 |
| Hemoglobin, gamma G                             | AI133196 |       |      |       |      | -1,84 | 1,66 |
| Phosphoglucomutase 1                            | AI207581 |       |      | -1,99 | 2,07 | -1,98 | 0,86 |
| Retinol-binding protein 4, plasma               | AI207655 | -1,99 | 0,51 | -1,89 | 3,78 |       |      |
| Claudin 7                                       | AI279608 | -2,12 | 4,43 |       |      | -2,77 | 0,77 |
| Thymocyte antigen CD1t                          | AI336342 | -1,95 | 0,51 | -2,20 | 0,59 |       |      |
| Zinc finger protein 415                         | AI376803 |       |      |       |      | -1,81 | 1,24 |
| Formin binding protein 21                       | AI392730 | -2,05 | 2,32 |       |      |       |      |
| Prostaglandin E synthase                        | AI421214 |       |      |       |      | -1,94 | 0,91 |
| Similar to thioredoxin-like 2                   | AI479766 |       |      | -1,80 | 4,75 |       |      |
| Solute carrier family 16, member 1              | AI565092 | -2,26 | 4,06 |       |      |       |      |
| CLIP-associating protein 2                      | AI583424 | -1,87 | 2,99 |       |      |       |      |
| Dual specificity phosphatase 7                  | AI655015 |       |      | -2,71 | 0,59 |       |      |
| Hypothetical protein LOC388928                  | AI685683 |       |      |       |      | -1,92 | 1,23 |
| Ankyrin repeat domain 12                        | AI692537 |       |      | -1,96 | 4,43 |       |      |
| Tetraspanin 6                                   | AI721194 |       |      |       |      | -2,29 | 0,77 |
| Protease, serine, 16 (thymus)                   | AI800750 | -2,74 | 0,51 |       |      |       |      |
| Immediate early response 3                      | AI911657 |       |      |       |      | -1,92 | 1,43 |
| Calmin (calponin-like, transmembrane)           | AI915271 |       |      |       |      | -1,80 | 1,42 |
| Kinesin family member C3                        | AI961712 |       |      |       |      | -1,87 | 0,91 |
| Mediterranean fever                             | AJ003147 |       |      | -2,19 | 1,76 |       |      |
| ATPase, Class II, type 9B                       | AJ006268 |       |      |       |      | -1,90 | 1,43 |
| Ret finger protein-like 1                       | AJ010228 |       |      |       |      | -1,85 | 1,24 |
| RING-H2 protein RNF6, alternative exon 1t       | AJ010347 | -1,89 | 1,40 |       |      |       |      |
| InaD-like                                       | AJ224747 |       |      | -2,14 | 1,76 |       |      |
| Zinc finger protein 198                         | AJ224901 | -3,57 | 4,06 |       |      | -2,70 | 4,26 |
| Ig heavy constant mu                            | AJ294731 |       |      | -2,98 | 1,76 | -3,01 | 0,77 |
| Syntenic region on chromosome 11p15.3           | AJ400877 |       |      | -2,13 | 1,76 |       |      |
| Myosin IB                                       | AK000160 | -1,83 | 3,56 |       |      |       |      |
| Clone KAIA4699                                  | AK000400 |       |      |       |      | -2,11 | 1,24 |
| Zinc finger protein 334                         | AK001331 |       |      |       |      | -1,97 | 0,86 |
| Zinc finger, DHHC-type containing 4             | AK001341 |       |      | -1,81 | 3,79 |       |      |

|                                                           |          |       |      |       |      |       |      |
|-----------------------------------------------------------|----------|-------|------|-------|------|-------|------|
| Ubiquitin-conjugating enzyme E2W (putative)               | AK001873 |       |      |       |      | -1,89 | 1,08 |
| REV1-like                                                 | AK002087 |       |      |       |      | -2,41 | 1,66 |
| Cyclin-dependent kinase inhibitor 2C                      | AK021794 | -2,15 | 0,51 | -1,85 | 3,78 |       |      |
| TBP-associated factor, RNA polymerase II 68kDa (TAF15)    | AK022003 | -2,03 | 2,32 | -1,97 | 4,43 |       |      |
| Cytochrome P450, family 4, subfamily V, polypeptide 2     | AK022114 |       |      |       |      | -1,91 | 1,06 |
| Hypothetical protein FLJ12118                             | AK022180 |       |      | -2,45 | 0,59 |       |      |
| Geranylgeranyl diphosphate synthase                       | AK022422 |       |      |       |      | -2,07 | 0,86 |
| Advillin                                                  | AK022448 |       |      |       |      | -3,16 | 0,91 |
| Zinc finger protein 329                                   | AK022648 |       |      |       |      | -1,89 | 1,42 |
| * Solute carrier family 25, member 12                     | AK022828 | -1,94 | 1,55 |       |      | -2,02 | 0,86 |
| Similar to hypothetical protein LOC231503                 | AK023055 |       |      |       |      | -2,12 | 0,77 |
| Highly similar to Sp140 protein                           | AK023116 | -2,04 | 0,51 |       |      |       |      |
| DnaJ (Hsp40) homolog, subfamily B, member 5               | AK023253 | -2,72 | 2,49 |       |      | -2,47 | 1,55 |
| Two pore segment channel 2                                | AK023366 | -2,01 | 0,51 | -1,83 | 3,79 |       |      |
| ARP6 actin-related protein 6 homolog                      | AK023684 |       |      | -2,00 | 2,07 | -1,93 | 0,91 |
| HBS1-like                                                 | AK024258 | -2,22 | 0,51 |       |      |       |      |
| Enhancer of polycomb homolog 1                            | AK024329 |       |      | -3,52 | 2,66 | -3,54 | 1,06 |
| DnaJ (Hsp40) homolog, subfamily B, member 14              | AK024343 |       |      | -1,83 | 4,75 |       |      |
| Glyoxylate reductase/hydroxypyruvate reductase            | AK024386 |       |      | -2,53 | 0,59 |       |      |
| Esophageal cancer associated protein                      | AK024693 | -2,14 | 0,51 | -1,81 | 4,43 |       |      |
| * Carnitine palmitoyltransferase 1A (liver)               | AK025307 | -1,87 | 1,40 |       |      | -1,97 | 0,91 |
| Similar to ras-related small GTP binding protein Rab5     | AK025474 |       |      |       |      | -2,15 | 0,91 |
| Coronin 7                                                 | AK025674 | -1,93 | 1,27 |       |      |       |      |
| AE binding protein 2                                      | AK025788 |       |      | -1,86 | 3,45 | -1,94 | 0,91 |
| Rho-guanine nucleotide exchange factor                    | AK025816 | -2,13 | 2,49 |       |      |       |      |
| Hypothetical protein FLJ22405                             | AK026058 | -2,15 | 0,51 | -2,35 | 0,59 | -2,26 | 0,77 |
| F-box and WD-40 domain protein 5                          | AK026081 |       |      |       |      | -2,12 | 1,43 |
| Zinc finger protein 677                                   | AK026366 |       |      |       |      | -1,84 | 1,24 |
| TATA box-binding protein-associated factor 1E             | AK026521 |       |      |       |      | -1,94 | 1,06 |
| ATP synthase, mitochondrial, epsilon chain                | AK026556 | -1,85 | 2,49 |       |      |       |      |
| Claudin 4                                                 | AK026651 |       |      | -1,93 | 2,66 |       |      |
| Tripartite motif-containing 52                            | AK026706 |       |      |       |      | -1,90 | 1,55 |
| v-ras simian leukemia viral oncogene homolog 3            | AK026850 |       |      | -1,86 | 3,78 | -2,11 | 0,77 |
| Pleiomorphic adenoma gene-like 2                          | AK026951 |       |      | -1,90 | 2,66 |       |      |
| Golgi apparatus protein 1                                 | AK027032 |       |      | -2,08 | 1,76 | -1,84 | 1,24 |
| Chromosome 20 open reading frame 5C                       | AK027065 |       |      |       |      | -1,99 | 1,24 |
| Leucine proline-enriched proteoglycan (leprecan)          | AK027648 | -1,93 | 0,51 |       |      |       |      |
| RAB2B, member RAS oncogene family                         | AK027730 | -2,14 | 1,40 | -2,28 | 1,76 | -2,29 | 0,77 |
| Ring finger protein 170                                   | AK027748 |       |      |       |      | -1,83 | 1,42 |
| Source of immunodominant MHC-associated peptide           | AK027789 | -2,00 | 1,40 | -2,38 | 0,59 | -2,14 | 0,77 |
| Zinc finger protein 585B                                  | AK027834 | -1,93 | 3,23 |       |      |       |      |
| Tensin 4                                                  | AK027856 |       |      |       |      | -2,02 | 1,06 |
| Clone RP4-816K17 on chromosome 20p12.2-13                 | AL031678 |       |      |       |      | -1,92 | 1,66 |
| MAS-related GPR, member F                                 | AL049451 |       |      |       |      | -1,82 | 1,83 |
| Regulatory factor X, 5                                    | AL050135 | -1,83 | 2,32 | -1,83 | 3,78 | -1,86 | 1,23 |
| Clone DKFZp586N0819                                       | AL050285 |       |      |       |      | -2,52 | 1,93 |
| RNA binding motif protein, X-linked 2                     | AL050405 | -1,84 | 3,56 |       |      |       |      |
| NIMA-related kinase 7                                     | AL080111 | -1,83 | 4,95 |       |      | -2,37 | 0,77 |
| Formyltetrahydrofolate synthetase domain containing       | AL117452 | -1,90 | 1,55 |       |      |       |      |
| Kelch-like 7                                              | AL136597 |       |      | -2,29 | 0,59 |       |      |
| Actin-like 6A                                             | AL136608 |       |      | -1,85 | 4,43 |       |      |
| PTK9L protein tyrosine kinase 9-like (A6-related protein) | AL136773 | -1,94 | 3,23 | -1,99 | 4,43 |       |      |
| Makorin 1                                                 | AL136812 | -1,95 | 1,27 | -2,21 | 0,59 | -2,10 | 0,77 |
| Adaptor-related protein complex 2, alpha 1 subunit        | AL136925 | -1,82 | 4,43 |       |      | -1,94 | 1,43 |
| Hypothetical protein MGC5139                              | AL137327 |       |      | -1,96 | 4,43 |       |      |
| Hypothetical protein LOC90499                             | AL137712 | -1,85 | 3,56 |       |      |       |      |
| PX domain containing serine/threonine kinase              | AL137938 |       |      | -1,92 | 2,66 |       |      |
| Kinesin-like 8                                            | AL162078 | -1,85 | 2,32 |       |      |       |      |
| Chromosome 21 segment HS21C003                            | AL163203 |       |      |       |      | -1,95 | 0,91 |
| Chromosome 21 segment HS21C048                            | AL163248 |       |      | -1,96 | 2,66 | -1,91 | 1,06 |
| Chromosome 21 segment HS21C048                            | AL163248 |       |      |       |      | -2,19 | 1,06 |
| Calcineurin A alpha                                       | AL353950 |       |      |       |      | -1,88 | 1,24 |
| DDHD domain containing 1                                  | AL353954 |       |      |       |      | -1,89 | 1,43 |
| Ring finger protein 36                                    | AL360161 |       |      |       |      | -1,80 | 1,43 |
| Prefoldin 1                                               | AL521761 | -2,09 | 1,40 |       |      |       |      |
| RAD51 homolog                                             | AL524788 |       |      | -1,89 | 2,97 |       |      |
| EBNA1-binding protein 2                                   | AL526336 | -2,14 | 0,51 | -2,42 | 0,59 | -1,97 | 1,06 |

|                                                            |          |       |      |       |       |            |
|------------------------------------------------------------|----------|-------|------|-------|-------|------------|
| Plexin D1                                                  | AL527865 |       |      |       | -2,11 | 0,77       |
| SET domain and mariner transposase fusion gene             | AL528596 | -1,96 | 2,97 |       |       |            |
| Complement component 1 inhibitor                           | AL531502 |       |      |       | -2,04 | 0,77       |
| Septin 8                                                   | AL532971 |       |      |       | -1,99 | 0,91       |
| Ubiquitin specific peptidase 14                            | AL546236 | -2,14 | 1,20 |       |       |            |
| Interleukin 1 receptor-like 1                              | AL553735 |       |      |       | -2,01 | 0,77       |
| Dual specificity phosphatase 3                             | AL555009 |       |      |       | -1,92 | 1,08       |
| Glycogen synthase 1 (muscle)                               | AL556228 | -1,86 | 2,66 |       |       |            |
| Opiate receptor-like 1                                     | AL574931 |       |      |       | -1,91 | 0,91       |
| N-acetyltransferase 6                                      | AL576483 | -1,93 | 2,66 |       |       |            |
| Hyaluronoglucosaminidase 1                                 | AL578077 | -1,91 | 4,43 | -2,05 | 0,91  |            |
| Chromosome 21q, section 32/105                             | AP001688 | -1,92 | 2,97 | -2,22 | 0,77  |            |
| Chromosome 21q, section 56/105                             | AP001712 | -8,99 | 3,79 | -8,49 | 1,66  |            |
| Chromosome 21q, section 60/105                             | AP001716 |       |      |       | -2,16 | 0,91       |
| Chromosome 21q, section 63/105                             | AP001719 |       |      |       | -1,90 | 0,86       |
| Chromosome 21q, section 96/105                             | AP001752 | -2,70 | 0,59 | -2,13 | 1,24  |            |
| Chromosome 21q, section 96/105                             | AP001752 | -1,87 | 2,32 |       |       |            |
| Chromosome 1q22-q23, CD1 region                            | AP002534 |       |      |       | -2,16 | 0,77       |
| Clone KB87D5 on chromosome 8q23                            | AP002850 | -2,08 | 0,51 |       | -1,82 | 1,42       |
| Clone KB1629B1 on chromosome 8q23                          | AP003439 |       |      |       | -2,14 | 1,66       |
| Pleiotrophin                                               | AU120808 | -1,89 | 1,27 | -1,80 | 3,79  |            |
| Keratin 15                                                 | AU122673 |       |      | -1,85 | 4,75  |            |
| Calponin 2                                                 | AU124309 |       |      | -1,85 | 2,97  |            |
| Hypothetical gene CG012                                    | AU130970 |       |      | -2,04 | 1,76  |            |
| Forkhead box O3A                                           | AU134033 | -2,01 | 2,32 | -1,92 | 4,43  |            |
| N-acylsphingosine amidohydrolase-like protein              | AU143425 |       |      |       | -1,80 | 1,55       |
| Ubiquinol-cytochrome c reductase core protein              | AU148041 | -1,80 | 2,32 |       |       |            |
| Myosin X                                                   | AU151619 |       |      |       | -2,16 | 0,77       |
| NADH dehydrogenase 1 alpha subcomplex :                    | AV647700 | -1,83 | 1,40 |       |       |            |
| Ribosomal protein S7                                       | AV650019 | -1,89 | 2,99 |       |       |            |
| G protein-coupled receptor 171                             | AV653286 |       |      |       | -1,89 | 1,06       |
| Sialic acid binding Ig-like lectin 6                       | AV712452 |       |      |       | -1,92 | 2,00       |
| LY6/PLAUR domain containing 1                              | AV727120 |       |      |       | -1,84 | 1,23       |
| Integrin, alpha E (antigen CD103)                          | AV762515 | -1,88 | 2,32 |       |       |            |
| Histone 1, H2ae                                            | AV763030 |       |      | -1,92 | 2,66  | -1,91 1,06 |
| Cytochrome c oxidase subunit VIIa polypeptide 2 (liver     | AV764305 | -1,95 | 1,40 | -2,44 | 0,59  |            |
| Thyroid hormone receptor coactivating protein              | AW020536 | -2,17 | 0,51 | -2,09 | 0,59  | -1,96 0,77 |
| Cytochrome P450, family 24, subfamily A, polypeptide 1     | AW022349 |       |      |       | -1,92 | 1,08       |
| Phosphatidic acid phosphatase type 2E                      | AW131816 | -1,85 | 1,55 |       |       |            |
| Dual specificity phosphatase 8                             | AW189334 |       |      | -1,87 | 4,43  | -1,90 1,24 |
| RAB2, member RAS oncogene family                           | AW301641 |       |      |       | -1,98 | 0,91       |
| LIM domain 7                                               | AW469395 |       |      | -2,59 | 0,59  |            |
| Intercellular adhesion molecule 2                          | AW577907 | -1,87 | 3,56 |       | -2,29 | 0,77       |
| Ankyrin repeat domain 7                                    | AW780029 |       |      |       | -2,01 | 0,77       |
| Platelet-derived growth factor receptor, alpha polypeptide | AW887370 |       |      | -1,93 | 4,60  | -2,30 0,77 |
| BH-protocadherin (brain-heart)                             | AW960791 |       |      | -1,99 | 2,07  | -2,26 0,77 |
| Runt-related transcription factor 1                        | AW963298 | -2,08 | 0,51 |       |       |            |
| SRY (sex determining region Y)-box 5 (Sox5                 | BAA32567 |       |      | -2,41 | 1,76  | -2,79 0,77 |
| Putative protein                                           | BAB22510 | -2,07 | 2,32 |       |       |            |
| Putative protein                                           | BAB23743 | -2,01 | 3,23 |       |       |            |
| Putative protein                                           | BAB25067 |       |      |       | -2,00 | 0,86       |
| Unnamed protein                                            | BAB25692 |       |      |       | -1,97 | 1,06       |
| Putative protein                                           | BAB25981 | -2,03 | 3,23 |       | -2,11 | 1,23       |
| Unnamed protein                                            | BAB26083 |       |      |       | -2,12 | 4,26       |
| Unnamed protein                                            | BAB30477 |       |      |       | -1,85 | 1,42       |
| Insulin-like growth factor binding protein 3               | BC000013 |       |      |       | -1,82 | 1,66       |
| Cadherin, EGF LAG seven-pass G-type receptor 1             | BC000059 |       |      |       | -2,03 | 0,91       |
| Similar to dynamin 1-like                                  | BC000136 | -1,96 | 3,56 |       |       |            |
| Dihydrofolate reductase                                    | BC000192 |       |      | -1,84 | 3,79  |            |
| Non-metastatic cells 3                                     | BC000250 | -1,83 | 3,56 |       |       |            |
| Thyroid hormone receptor interactor 1                      | BC000404 |       |      |       | -1,97 | 0,86       |
| Protein disulfide isomerase family A, member 4             | BC000425 |       |      | -2,10 | 1,76  |            |
| Ubiquinol-cytochrome c reductase core protein I            | BC000484 | -1,84 | 1,27 |       |       |            |
| Keratin 8                                                  | BC000654 | -2,08 | 0,51 | -2,02 | 1,76  |            |
| MAX dimerization protein 3                                 | BC000745 |       |      | -1,98 | 2,07  |            |
| Heat shock 90kDa protein 1, alpha                          | BC000987 |       |      | -1,91 | 2,07  |            |
| Protein phosphatase 2, regulatory subunit B, delta isoform | BC001095 | -1,95 | 2,49 | -1,92 | 4,75  | -2,17 0,77 |



|                                                             |          |       |      |       |      |       |      |
|-------------------------------------------------------------|----------|-------|------|-------|------|-------|------|
| Tripartite motif-containing 62                              | BC001222 |       |      | -1,84 | 2,66 |       |      |
| SH3-domain GRB2-like 1                                      | BC001270 | -1,97 | 1,27 |       |      |       |      |
| TRPC4-associated protein (subfamily C)                      | BC001323 | -1,92 | 0,51 |       |      |       |      |
| Mitogen-activated protein kinase-activated protein kinase 3 | BC001662 | -2,07 | 0,51 | -1,91 | 2,97 | -2,02 | 0,86 |
| Asparaginyl-tRNA synthetase                                 | BC001687 | -2,05 | 0,51 | -2,21 | 0,59 | -1,91 | 1,06 |
| Lectin, galactoside-binding, soluble, 1 (galectin 1)        | BC001693 |       |      | -1,92 | 2,07 | -2,03 | 0,77 |
| Angiotensin-like 7                                          | BC001881 |       |      | -1,97 | 3,45 |       |      |
| Dehydrogenase/reductase (SDR family) member 3               | BC002730 |       |      | -1,97 | 2,07 | -1,98 | 0,86 |
| Phosphatidic acid phosphatase type 2C                       | BC002806 |       |      |       |      | -1,83 | 1,08 |
| Cysteinyl-tRNA synthetase                                   | BC002880 |       |      | -2,01 | 1,98 | -1,86 | 1,08 |
| Hypothetical protein MGC11335                               | BC002943 |       |      |       |      | -2,09 | 0,77 |
| GATA-binding protein 3                                      | BC003070 | -2,12 | 0,51 |       |      |       |      |
| Lysosomal-associated protein transmembrane 4 alpha          | BC003158 |       |      | -1,94 | 2,66 |       |      |
| Speckle-type POZ protein                                    | BC003385 | -2,10 | 1,27 | -1,84 | 4,75 |       |      |
| Heterogeneous nuclear ribonucleoprotein C (C1/C2)           | BC003394 | -2,30 | 0,51 | -2,42 | 0,59 |       |      |
| Ret finger protein 2                                        | BC003579 |       |      |       |      | -1,86 | 1,23 |
| Matrix metalloproteinase 7                                  | BC003635 |       |      | -5,03 | 2,66 | -4,70 | 1,43 |
| RNA binding motif protein 10                                | BC004181 | -1,86 | 1,27 | -2,14 | 1,20 |       |      |
| Metastasis associated 1 family, member 3                    | BC004227 | -2,17 | 0,51 | -2,27 | 0,59 | -1,80 | 1,55 |
| Plexin B2                                                   | BC004542 |       |      | -1,85 | 3,45 |       |      |
| Carbonic anhydrase III, muscle specific                     | BC004897 |       |      | -2,06 | 3,78 |       |      |
| Putative protein                                            | BC004948 |       |      | -1,98 | 1,98 | -2,07 | 0,77 |
| Solute carrier family 25, member 1                          | BC004980 | -2,11 | 0,51 |       |      |       |      |
| Glutaredoxin (thioltransferase)                             | BC005304 | -1,97 | 1,40 |       |      |       |      |
| Interferon gamma receptor 1                                 | BC005333 |       |      | -3,55 | 3,79 |       |      |
| Erythrocyte membrane protein band 4.1-like 3                | BC006141 | -1,87 | 2,99 | -2,18 | 1,76 | -2,16 | 0,77 |
| Asparaginase like 1                                         | BC006267 |       |      |       |      | -2,26 | 1,23 |
| Hypothetical protein MGC10540                               | BC006282 | -1,93 | 1,40 |       |      |       |      |
| Peroxisomal biogenesis factor 14                            | BC006327 |       |      |       |      | -1,88 | 1,23 |
| PDZ domain containing 1                                     | BC006496 |       |      |       |      | -1,80 | 3,75 |
| Amyloid P component, serum                                  | BC007058 |       |      |       |      | -3,39 | 1,55 |
| Plasminogen activator, tissue                               | BC007231 |       |      |       |      | -2,11 | 0,77 |
| Exonuclease NEF-sp                                          | BC007646 |       |      |       |      | -1,83 | 4,15 |
| Dual specificity phosphatase 2                              | BC007771 |       |      |       |      | -2,26 | 0,77 |
| PAX interacting protein 1                                   | BC008328 |       |      | -2,08 | 1,76 |       |      |
| Ubiquitin-conjugating enzyme E2G 2                          | BC008351 |       |      | -2,14 | 1,98 | -1,92 | 1,23 |
| Eukaryotic translation initiation factor 3, subunit 6       | BC008419 | -1,97 | 2,32 |       |      |       |      |
| Transmembrane 4 L six family member 1                       | BC008442 |       |      |       |      | -1,92 | 1,06 |
| ARP3 actin-related protein 3 homolog E                      | BC008682 |       |      |       |      | -2,00 | 0,77 |
| HLA-B associated transcript 4                               | BC008783 | -2,67 | 0,51 | -2,27 | 1,77 | -2,26 | 0,77 |
| Keratin 6A                                                  | BC008807 | -1,86 | 1,40 |       |      |       |      |
| Kinesin 2 60/70kDa                                          | BC008881 | -1,87 | 2,32 |       |      |       |      |
| TRK-fused gene                                              | BC009241 | -2,36 | 0,51 | -2,30 | 0,59 | -1,88 | 1,23 |
| Hermansky-Pudlak syndrome 6                                 | BC009258 |       |      | -1,87 | 4,60 | -1,97 | 1,06 |
| Clone 15169                                                 | BC009342 |       |      |       |      | -1,81 | 1,24 |
| Collagen alpha 1(I) chain precursor                         | BC009436 | -1,94 | 1,40 |       |      |       |      |
| Chaperonin containing TCP1, subunit 5 (epsilon)             | BC009454 | -1,86 | 1,40 | -1,98 | 1,98 |       |      |
| Dopamine receptor D5                                        | BC009748 |       |      |       |      | -1,87 | 1,23 |
| MUS81 endonuclease homolog                                  | BC009999 | -2,11 | 0,51 |       |      | -1,82 | 1,24 |
| DR1-associated protein 1                                    | BC010025 |       |      | -2,30 | 0,59 | -2,00 | 0,77 |
| Claudin 15                                                  | BC010160 | -1,86 | 2,32 |       |      |       |      |
| Stomatin                                                    | BC010703 |       |      |       |      | -2,00 | 0,77 |
| Protease inhibitor 3, skin-derived (SKALP)                  | BC010952 | -2,01 | 1,27 |       |      |       |      |
| Oncostatin M                                                | BC011589 |       |      |       |      | -1,81 | 1,43 |
| Interleukin 17 receptor                                     | BC011624 |       |      | -1,95 | 4,75 |       |      |
| Protein phosphatase 2, catalytic subunit, beta isoform      | BC012022 |       |      |       |      | -1,83 | 1,08 |
| PDZ domain containing 8                                     | BC012186 | -1,98 | 1,55 |       |      | -1,92 | 1,23 |
| Betaine-homocysteine methyltransferase                      | BC012616 |       |      |       |      | -1,81 | 1,83 |
| Deoxynucleotidyltransferase terminal                        | BC012920 | -1,92 | 1,27 |       |      |       |      |
| Opa interacting protein 5                                   | BE045993 |       |      | -2,07 | 1,77 |       |      |
| Tumor suppressing subtransferable candidate 1               | BE219591 |       |      |       |      | -1,89 | 0,91 |
| SWI/SNF related protein, subfamily d, member 2              | BE254018 | -2,12 | 1,40 | -2,51 | 0,59 | -2,16 | 0,77 |
| Nucleoside phosphorylase                                    | BE266250 |       |      | -2,24 | 0,59 |       |      |
| Thioredoxin-like 4                                          | BE275227 | -1,98 | 0,51 | -2,40 | 0,59 | -1,88 | 0,91 |
| Tumor necrosis factor superfamily, member 4                 | BE349175 |       |      | -1,97 | 2,66 |       |      |
| Similar to MER9 repetitive element                          | BE350898 |       |      | -1,90 | 2,97 |       |      |
| Similar to CG5435-PA                                        | BE501346 |       |      | -1,97 | 4,43 |       |      |

|                                                         |          |       |      |       |      |       |      |
|---------------------------------------------------------|----------|-------|------|-------|------|-------|------|
| Small nuclear ribonucleoprotein polypeptide A           | BE501622 | -2,20 | 0,51 | -2,29 | 0,59 | -1,85 | 1,24 |
| Isoleucine-tRNA synthetase                              | BE513909 |       |      | -1,87 | 3,45 |       |      |
| Williams-Beuren syndrome chromosome region 1            | BE531346 |       |      | -2,04 | 2,66 |       |      |
| Kinesin family member 14                                | BE644769 | -1,84 | 2,49 |       |      |       |      |
| Zinc finger, BED-type containing 1                      | BE674930 |       |      |       |      | -1,80 | 1,66 |
| Nuclear antigen Sp100                                   | BE675052 |       |      | -2,19 | 0,59 |       |      |
| Small proline-rich protein 2A                           | BE714149 |       |      | -1,98 | 4,43 | -1,85 | 1,93 |
| Huntingtin interacting protein B                        | BE735468 | -2,01 | 0,51 |       |      |       |      |
| Thyroid hormone receptor interactor 4                   | BE740238 | -2,00 | 2,32 |       |      |       |      |
| Ig superfamily, member 2                                | BE746215 |       |      |       |      | -2,47 | 0,91 |
| Clone 3941904                                           | BE797338 |       |      |       |      | -1,81 | 1,66 |
| Hypothetical protein HT03C                              | BE818955 | -1,82 | 2,49 |       |      |       |      |
| Serpin peptidase inhibitor, clade B, member 4           | BE856006 |       |      |       |      | -1,86 | 1,24 |
| P53-inducible cell-survival factor                      | BE858411 |       |      | -2,04 | 1,77 |       |      |
| Ubiquitin specific peptidase 1C                         | BE891142 |       |      |       |      | -2,01 | 0,86 |
| Phenylalanine-tRNA synthetase-like                      | BE892769 | -1,82 | 2,49 |       |      |       |      |
| Neutral sphingomyelinase activation associated factor 1 | BF111145 |       |      |       |      | -1,82 | 1,23 |
| Complement component 4B                                 | BF338113 | -2,71 | 0,51 | -2,14 | 1,20 | -2,49 | 0,77 |
| Placental growth factor (PGF)                           | BF431974 |       |      |       |      | -2,11 | 0,77 |
| Carbohydrate sulfotransferase 2                         | BF477523 | -1,85 | 2,32 |       |      |       |      |
| MRS2-like, Magnesium homeostasis factor                 | BF508841 |       |      | -2,26 | 0,59 |       |      |
| Interferon-stimulated transcription factor 3, gamma     | BF525953 |       |      | -2,07 | 1,77 |       |      |
| Ubiquitin specific peptidase 11                         | BF530688 |       |      | -1,95 | 2,89 |       |      |
| Spastic paraplegia 7, paraplegin                        | BF570017 |       |      | -2,21 | 1,76 |       |      |
| Cyclin C                                                | BF593642 | -1,83 | 1,40 | -1,94 | 2,07 |       |      |
| RAD21 homolog                                           | BF696386 | -1,89 | 1,55 |       |      |       |      |
| Vacuolar protein sorting 45B                            | BF796127 | -4,74 | 3,23 | -4,34 | 3,45 | -3,71 | 2,75 |
| ATP-binding cassette, sub-family F, member 2            | BF982597 |       |      |       |      | -2,03 | 0,77 |
| Dystrophia myotonia-containing WD repeat motif 1        | BF996358 |       |      |       |      | -1,87 | 1,43 |
| ATP synthase, mitochondrial, subunit F6                 | BG030146 | -1,98 | 0,51 |       |      |       |      |
| General transcription factor IIF, polypeptide 2         | BG032043 |       |      |       |      | -2,01 | 0,77 |
| WD repeat domain 1                                      | BG034829 | -1,84 | 2,49 | -2,05 | 2,07 |       |      |
| Glycoprotein, synaptic 2                                | BG036398 | -1,82 | 2,32 |       |      |       |      |
| BRCA1 associated protein-1                              | BG109611 | -1,83 | 2,99 |       |      |       |      |
| Small nuclear ribonucleoprotein polypeptide C           | BG110237 | -1,88 | 1,40 |       |      |       |      |
| Cyclin I                                                | BG165160 | -1,81 | 2,49 |       |      |       |      |
| Exportin 7                                              | BG179617 |       |      |       |      | -1,96 | 0,86 |
| Histidine triad nucleotide binding protein 1            | BG179851 |       |      |       |      | -2,04 | 0,77 |
| Phosphatidylinositol glycan, class C                    | BG216242 |       |      |       |      | -1,85 | 1,23 |
| Tumor-associated calcium signal transducer 2            | BG259957 |       |      | -2,12 | 1,76 | -1,87 | 1,24 |
| KCNMB3 gene                                             | BG261015 |       |      | -2,28 | 0,59 |       |      |
| v-myb avian myeloblastosis viral oncogene homolog 1     | BG387620 | -2,08 | 0,51 |       |      |       |      |
| c-src tyrosine kinase                                   | BG391140 | -1,82 | 2,49 | -2,13 | 1,76 | -2,03 | 0,77 |
| Protein tyrosine phosphatase, receptor type, C          | BG421123 |       |      | -1,94 | 2,30 |       |      |
| U3 snoRNP protein 4 homolog                             | BG436654 | -1,91 | 1,40 |       |      |       |      |
| Keratin, hair, basic, 6                                 | BG490944 |       |      | -2,15 | 3,45 |       |      |
| NADH-ubiquinone oxidoreductase 1 beta subcomplex 1      | BG492618 |       |      | -2,65 | 0,59 | -1,86 | 1,06 |
| Translation initiation factor 1A, Y-linked              | BG498472 |       |      | -1,96 | 2,66 |       |      |
| Translation initiation factor 3, subunit 6, 48kDa       | BG499049 |       |      | -1,96 | 2,66 |       |      |
| Valyl-tRNA synthetase                                   | BG519757 |       |      |       |      | -1,90 | 1,24 |
| Breast carcinoma amplified sequence 2                   | BG527737 |       |      | -2,15 | 0,59 | -1,98 | 0,77 |
| Secretory leukocyte protease inhibitor                  | BG533465 | -2,07 | 0,51 |       |      |       |      |
| Interferon, alpha-inducible protein 27                  | BG535739 |       |      | -1,95 | 2,30 |       |      |
| Hypothetical gene supported by BC055092                 | BG611120 | -1,85 | 2,49 |       |      | -1,86 | 1,42 |
| BET1 homolog                                            | BG612104 |       |      | -2,08 | 1,76 |       |      |
| Actin related protein 2/3 complex, subunit 3            | BG620669 | -1,91 | 0,51 |       |      |       |      |
| Endothelial differentiation gene 2 (EDG2)               | BG621964 |       |      |       |      | -1,96 | 0,86 |
| CDK2-associated protein 1                               | BG676784 | -1,92 | 1,40 |       |      |       |      |
| Ras-related C3 botulinum toxin substrate 2              | BG684065 |       |      | -1,89 | 2,66 |       |      |
| Transmembrane emp24-like trafficking protein 10         | BG708327 |       |      | -1,93 | 2,66 |       |      |
| Keratin 5                                               | BG739723 | -2,07 | 4,43 |       |      |       |      |
| Hepatoma-derived growth factor                          | BG740896 | -1,82 | 2,32 | -2,17 | 1,76 |       |      |
| Src homology 2 domain containing adaptor protein E      | BG751150 |       |      |       |      | -1,81 | 1,24 |
| Galectin 3                                              | BG770327 | -2,00 | 1,27 | -2,26 | 0,59 | -1,98 | 0,91 |
| Isocitrate dehydrogenase 1 (NADP+), soluble             | BG939422 |       |      | -2,29 | 0,59 |       |      |
| Hemoglobin, delta                                       | BG943559 |       |      |       |      | -2,28 | 0,77 |
| C2f protein                                             | BG999341 | -2,06 | 2,49 |       |      | -2,07 | 1,23 |

|                                                        |          |       |      |       |      |
|--------------------------------------------------------|----------|-------|------|-------|------|
| Inosine monophosphate dehydrogenase 2                  | BI223795 | -1,91 | 2,66 | -1,89 | 1,06 |
| Transcription factor 12                                | BI254529 | -1,98 | 1,98 |       |      |
| Mitogen-activated protein kinase 1                     | BI334631 |       |      | -1,90 | 1,66 |
| RNA pseudouridylate synthase domain containing 2       | BI334753 |       |      | -1,91 | 1,08 |
| Cytoplasmic FMR1 interacting protein 1                 | BI522540 | -2,05 | 2,07 |       |      |
| KIAA0433 protein                                       | BI522622 | -2,31 | 0,59 |       |      |
| 2,4-dienoyl CoA reductase 1, mitochondria              | BI560133 | -1,91 | 2,66 |       |      |
| Cullin 1                                               | BI599583 |       |      | -2,11 | 0,77 |
| Transcription elongation factor A-like 1               | BI712548 | -2,03 | 2,07 | -2,06 | 0,77 |
| Solute carrier family 22, member 18                    | BI761173 |       |      | -2,26 | 1,24 |
| Calpain 2 (large subunit)                              | BI771158 | -1,92 | 0,51 |       |      |
| Cytochrome c oxidase subunit Vic (COX6C)               | BI861005 | -1,93 | 1,40 |       |      |
| CD3D antigen, delta polypeptide (TiT3 complex)         | BI907465 | -1,93 | 1,55 |       |      |
| RNA binding motif protein 15B                          | BM021378 | -1,82 | 4,60 | -1,86 | 1,24 |
| Distal intestinal serine protease                      | CAB56465 |       |      | -1,81 | 1,43 |
| Unnamed protein                                        | CAC38896 |       |      | -2,00 | 1,55 |
| Unnamed protein                                        | CAC39400 |       |      | -1,84 | 1,83 |
| Histidine ammonia-lyase                                | D16626   |       |      | -2,01 | 0,91 |
| Nuclear receptor subfamily 1, group D, member 2        | D16815   | -1,84 | 4,60 |       |      |
| CD116 antigen                                          | D26616   |       |      | -2,41 | 0,91 |
| Helicase SKI2W                                         | D29641   | -2,17 | 0,51 | -1,93 | 2,66 |
| Ubiquitin specific protease 8                          | D29956   | -1,84 | 3,56 |       |      |
| Proteasome 26S subunit, non-ATPase, 5                  | D31889   |       |      | -1,84 | 1,93 |
| 2-oxoglutarate dehydrogenase                           | D32063   | -1,80 | 3,56 |       |      |
| Condensin complex subunit 2                            | D38553   | -1,86 | 1,55 |       |      |
| DNA cross-link repair 1A                               | D42045   |       |      | -1,83 | 4,60 |
| Membrane-bound transcription factor peptidase, site 1  | D42053   |       |      | -2,14 | 0,77 |
| RAB21, member RAS oncogene family                      | D42087   | -1,82 | 1,55 |       |      |
| Chemokine (C-C motif) ligand 17 (TARC)                 | D43767   |       |      | -2,21 | 0,59 |
| Adducin 1 (alpha)                                      | D44640   |       |      | -1,81 | 4,43 |
| Protein disulfide isomerase family A, member 5         | D49490   |       |      | -2,06 | 0,77 |
| ATP synthase, mitochondrial, F0 complex, subunit c     | D50371   | -2,19 | 1,27 | -2,16 | 1,98 |
| Ribosomal protein S21                                  | D52096   | -2,30 | 0,51 | -2,05 | 2,07 |
| Golgi autoantigen, golgin subfamily a, 2               | D63997   |       |      | -2,06 | 0,91 |
| SEC14-like 1                                           | D67029   |       |      | -1,89 | 1,43 |
| Dihydropyrimidinase-like 3                             | D78014   |       |      | -1,86 | 2,97 |
| RAB7, member RAS oncogene family-like 1                | D84488   | -2,22 | 2,32 | -1,96 | 1,55 |
| Neuropeptide Y receptor Yc                             | D86519   |       |      | -2,01 | 1,83 |
| RB1-inducible coiled-coil 1                            | D86958   | -1,87 | 1,40 | -1,94 | 2,30 |
| Regulator of nonsense transcripts 1                    | D86988   |       |      | -1,95 | 0,91 |
| KIAA0265 protein                                       | D87454   |       |      | -1,95 | 2,66 |
| CMP-sialic acid transporter                            | D87969   | -1,81 | 4,06 |       |      |
| Solute carrier family 33, member 1                     | D88152   |       |      | -2,20 | 0,77 |
| Endothelin receptor type A                             | D90348   |       |      | -2,13 | 3,78 |
| ATPase, H+ transporting, lysosomal 34kDa, V1 subunit C | H82183   | -2,15 | 0,51 |       |      |
| I factor (complement)                                  | J02770   |       |      | -1,87 | 3,75 |
| GH and chorionic somatomammotropin genes               | J03071   |       |      | -2,10 | 1,55 |
| Laminin, gamma 1                                       | J03202   | -1,92 | 2,32 | -2,46 | 0,59 |
| Surfactant, pulmonary-associated protein C             | J03553   |       |      | -1,81 | 1,93 |
| Plasminogen activator, tissue (PLAT)                   | K03021   |       |      | -2,05 | 0,86 |
| Basonuclin 1                                           | L03427   |       |      | -1,86 | 1,66 |
| cAMP responsive element binding protein 5              | L05912   | -2,37 | 3,56 |       |      |
| Myeloid cell leukemia sequence 1 (BCL2-related)        | L08246   |       |      | -1,88 | 2,89 |
| Rho A proto-oncogene                                   | L09159   | -1,84 | 2,99 | -1,87 | 1,43 |
| N-formyl peptide receptor and Alu repeats              | L10820   |       |      | -1,93 | 1,23 |
| Glycoprotein phospholipase C                           | L11702   |       |      | -1,85 | 1,93 |
| Dopamine receptor D4                                   | L12398   |       |      | -2,22 | 0,77 |
| Transketolase (Wernicke-Korsakoff syndrome)            | L12711   |       |      | -1,81 | 4,43 |
| Ig mu binding protein 2                                | L14754   |       |      | -1,84 | 2,97 |
| Zinc finger protein 141 (clone pHZ-44)                 | L15309   |       |      | -1,97 | 0,91 |
| Glutamate receptor, ionotropic, AMPA 2                 | L20814   |       |      | -2,18 | 0,77 |
| Arginine vasopressin receptor 1A                       | L25615   |       |      | -1,98 | 0,91 |
| Lamin B receptor                                       | L25931   | -1,87 | 1,55 |       |      |
| ST3 beta-galactoside alpha-2,3-sialyltransferase 1     | L29555   |       |      | -2,08 | 0,91 |
| Glycerol-3-phosphate dehydrogenase 1 (soluble)         | L34041   |       |      | -1,90 | 1,23 |
| FKBP-rapamycin associated protein (FRAP)               | L34075   | -1,93 | 0,51 |       |      |
| Sarcoglycan, alpha                                     | L34355   |       |      | -1,86 | 2,89 |
|                                                        |          | -2,01 | 0,77 |       |      |

|                                                            |           |       |      |       |      |       |      |
|------------------------------------------------------------|-----------|-------|------|-------|------|-------|------|
| Mitochondrial translational initiation factor 2            | L34600    | -2,08 | 0,51 |       |      |       |      |
| Aldehyde dehydrogenase 5 family, member A'                 | L34820    | -2,01 | 2,32 |       |      |       |      |
| Interferon receptor (IFNAR2)                               | L42237    | -1,80 | 3,23 | -2,13 | 1,98 |       |      |
| Clone JJ1a (cadherin)                                      | L43338    |       |      |       |      | -1,82 | 1,66 |
| Protein phosphatase 2, regulatory subunit B,ε isoform      | L76703    |       |      |       |      | -2,04 | 0,77 |
| ADP/ATP carrier protein (ANT-2) gene                       | L78810    |       |      |       |      | -1,85 | 1,24 |
| BRCA1, Rho7, vat1 and ipf35 genes                          | L78833    | -1,84 | 2,99 |       |      |       |      |
| Cathepsin D                                                | M11233    |       |      |       |      | -2,00 | 1,93 |
| Platelet-derived growth factor beta polypeptide            | M12783    |       |      |       |      | -1,81 | 1,43 |
| CD8 antigen, alpha polypeptide                             | M12824    | -1,91 | 0,51 |       |      |       |      |
| Proliferating cell nuclear antigen                         | M15796    |       |      | -1,85 | 3,78 |       |      |
| Cathepsin G                                                | M16117    | -2,61 | 2,32 |       |      | -2,21 | 1,83 |
| Butyrylcholinesterase                                      | M16541    |       |      |       |      | -1,93 | 1,06 |
| Thrombomodulin                                             | M16552    |       |      |       |      | -1,86 | 1,43 |
| ATP synthase beta subunit gene                             | M19482    |       |      |       |      | -2,37 | 0,77 |
| ATP-binding cassette, sub-family B, member 4               | M23234    |       |      |       |      | -1,81 | 2,75 |
| RAS p21 protein activator                                  | M23379    |       |      | -1,91 | 2,30 |       |      |
| Nucleophosmin                                              | M23613    | -1,89 | 1,55 |       |      |       |      |
| Hemoglobin mu chain                                        | M24173    |       |      |       |      | -2,02 | 1,08 |
| Na,K-ATPase beta subunit (ATP1B) gene                      | M25161    |       |      | -1,88 | 2,66 |       |      |
| ATPase, Ca <sup>++</sup> transporting, plasma membrane 4   | M25874    | -1,83 | 2,49 |       |      |       |      |
| ATP synthase beta subunit precursor (ATPSB) gene           | M27132    |       |      |       |      | -1,87 | 1,43 |
| CD80 antigen                                               | M27533    |       |      | -1,88 | 4,43 | -2,17 | 0,77 |
| Zinc finger protein 84                                     | M27878    |       |      | -2,00 | 1,98 | -1,99 | 0,77 |
| Calpastatin                                                | M28228    | -2,13 | 2,32 |       |      |       |      |
| Thymocyte antigen CD1t                                     | M28826    | -2,10 | 0,51 |       |      |       |      |
| Thymocyte antigen CD1c                                     | M28827    | -2,53 | 0,51 |       |      |       |      |
| Interleukin 7 receptor                                     | M29696    |       |      | -2,24 | 0,59 | -1,93 | 1,06 |
| 6-O-methylguanine-DNA methyltransferase                    | M29971    | -2,12 | 1,55 | -1,91 | 4,43 |       |      |
| L-plastin                                                  | M34426    | -2,17 | 2,99 |       |      | -2,46 | 0,77 |
| Neurotrophin-3                                             | M37763    |       |      |       |      | -1,84 | 1,55 |
| Tripeptidyl peptidase I                                    | M55169    |       |      |       |      | -4,35 | 4,26 |
| Solute carrier family 2, member 3 pseudogene 1             | M55536    |       |      |       |      | -1,83 | 3,07 |
| Hematopoietic protein 1                                    | M58285    | -1,89 | 2,49 | -1,94 | 3,45 |       |      |
| Nuclear factor kappa-B, subunit 1(NFKB1)                   | M58603    |       |      | -1,83 | 3,79 |       |      |
| Collagen, type VIII, alpha 2                               | M60832    |       |      | -2,56 | 2,07 | -2,60 | 0,77 |
| Growth differentiation factor 1                            | M62302    |       |      |       |      | -1,86 | 1,66 |
| Transcriptional enhancer factor (TEF1)                     | M63896    |       |      |       |      | -1,98 | 0,91 |
| Heat shock transcription factor 1                          | M64673    |       |      | -2,08 | 2,07 | -1,80 | 1,66 |
| Dystonin                                                   | M69225    | -2,14 | 0,51 | -2,10 | 1,77 | -2,11 | 0,77 |
| Insulin-like growth factor I receptor gene                 | M69229    |       |      |       |      | -3,49 | 2,75 |
| Glutamate decarboxylase 2                                  | M74826    |       |      |       |      | -1,90 | 2,25 |
| Translation termination factor 1                           | M75715    | -1,87 | 2,49 |       |      |       |      |
| Interleukin 5 receptor, alpha                              | M75914    |       |      |       |      | -1,87 | 1,06 |
| Subtilisin-like protein (PACE4)                            | M80482    | -1,84 | 1,55 |       |      |       |      |
| Transcription factor 12                                    | M80627    | -2,18 | 0,51 |       |      |       |      |
| S100 calcium binding protein A7 (psoriasin 1)              | M86757    |       |      |       |      | -1,96 | 1,06 |
| A kinase (PRKA) anchor protein 5                           | M90359    |       |      |       |      | -1,84 | 1,24 |
| Outer dense fiber protein (ODFIG)                          | M93132    |       |      |       |      | -1,88 | 0,91 |
| Lamin B2                                                   | M94362    | -2,09 | 1,27 |       |      |       |      |
| interferon-stimulated transcription factor 3, gamma        | M97935    |       |      | -2,38 | 0,59 | -1,96 | 0,91 |
| interferon-stimulated transcription factor 3, gamma        | M97935    |       |      | -1,81 | 3,78 |       |      |
| Phosphoribosylglycinamide formyltransferase                | N31908    |       |      |       |      | -1,83 | 1,42 |
| Adrenergic, beta-2-, receptor, surface                     | NM_000024 |       |      |       |      | -2,37 | 0,77 |
| Solute carrier family 12, member 1                         | NM_000338 |       |      |       |      | -1,89 | 1,06 |
| ATP-binding cassette, sub-family C, member ε               | NM_000352 |       |      |       |      | -1,82 | 1,43 |
| Adenylate kinase 1                                         | NM_000476 | -1,97 | 4,95 |       |      | -2,23 | 1,08 |
| Apolipoprotein A-IV                                        | NM_000482 |       |      |       |      | -5,64 | 1,08 |
| Calcium channel, voltage-dependent, gamma subunit          | NM_000727 |       |      |       |      | -1,93 | 1,43 |
| Gamma-aminobutyric acid (GABA) A receptor, alpha 3         | NM_000808 |       |      |       |      | -1,86 | 1,83 |
| Solute carrier family 2, member 4                          | NM_001042 |       |      |       |      | -1,88 | 0,91 |
| Amiloride-sensitive cation channel 1, neuronal (degenerin) | NM_001094 |       |      |       |      | -1,93 | 1,66 |
| Cyclin-dependent kinase inhibitor 2C                       | NM_001262 | -2,07 | 0,51 | -2,44 | 0,59 |       |      |
| Ig superfamily, member 1                                   | NM_001555 |       |      |       |      | -2,03 | 1,98 |
| Chemokine (C-X-C motif) ligand 10 (IP10)                   | NM_001565 |       |      | -1,94 | 2,97 |       |      |
| Hypothetical protein LOC15116                              | NM_002410 |       |      |       |      | -2,20 | 0,77 |
| Stress-activated protein kinase JNK1                       | NM_002750 | -2,24 | 1,27 |       |      | -2,03 | 1,08 |

|                                                           |           |       |       |       |       |
|-----------------------------------------------------------|-----------|-------|-------|-------|-------|
| Sodium channel, voltage-gated, type IX, alpha             | NM_002977 | -2,17 | 2,66  | -1,94 | 1,93  |
| Sialophorin (CD43)                                        | NM_003123 |       |       | -1,86 | 1,06  |
| Tight junction protein 1                                  | NM_003257 |       |       | -2,02 | 0,77  |
| Histone 1, H4k                                            | NM_003541 |       | -2,05 | 1,98  |       |
| Topoisomerase (DNA) III beta                              | NM_003935 | -1,81 | 4,95  |       |       |
| Rhomboid, veinlet-like 1                                  | NM_003961 |       |       | -1,80 | 1,43  |
| Chemokine (C-C motif) receptor-like 2 (CCRL2)             | NM_003965 |       | -1,84 | 3,78  |       |
| Peptide YY                                                | NM_004160 |       |       | -1,88 | 1,93  |
| Paraneoplastic antigen MA1                                | NM_006029 | -2,19 | 0,51  | -3,00 | 0,59  |
| Phospholipase C-like 1                                    | NM_006226 |       | -1,98 | 2,07  |       |
| IGF-II mRNA-binding protein 3                             | NM_006547 |       |       | -1,84 | 4,26  |
| Solute carrier family 17, member 3                        | NM_006632 |       | -2,07 | 1,76  | -2,17 |
| WD repeat domain 45                                       | NM_007075 |       | -1,92 | 2,97  |       |
| KIAA0748 protein                                          | NM_014796 |       |       | -1,88 | 0,91  |
| KIAA0329 protein                                          | NM_014844 |       | -1,82 | 4,43  |       |
| TED protein                                               | NM_015686 | -1,89 | 1,40  | -2,90 | 0,59  |
| PQ loop repeat containing 2                               | NM_017765 |       |       | -2,11 | 0,77  |
| Protocadherin 8                                           | NM_032949 |       |       | -2,10 | 1,23  |
| Glutamate receptor, ionotropic, kainate epsilon           | S40369    |       |       | -1,87 | 1,08  |
| Peptidylprolyl isomerase C (cyclophilin C)                | S71018    |       | -2,15 | 2,07  | -2,37 |
| Gamma-aminobutyric acid (GABA) A receptor, alpha epsilon  | S81944    |       |       | -2,19 | 0,77  |
| B-cell CLL/lymphoma 6 (BCL 6A)                            | T27711    | -1,84 | 2,32  | -2,28 | 0,59  |
| 5' region ZFX gene                                        | U00241    |       |       | -1,95 | 0,91  |
| Active BCR-related gene                                   | U01147    |       |       | -1,92 | 0,91  |
| Fibulin 1                                                 | U01244    |       |       | -1,97 | 1,06  |
| E1A binding protein p300                                  | U01877    |       |       | -1,89 | 1,06  |
| Fms-related tyrosine kinase 3 ligand                      | U03858    |       | -2,30 | 2,66  | -2,15 |
| Maspin                                                    | U04313    | -1,81 | 4,06  |       |       |
| RAB40B, member RAS oncogene family                        | U05227    |       |       | -2,03 | 4,13  |
| Zinc finger protein 78-like 1                             | U09413    |       |       | -1,86 | 1,23  |
| Zinc finger protein 137                                   | U09414    | -1,97 | 2,32  |       | -2,17 |
| Calmodulin 1                                              | U12022    |       |       | -2,06 | 0,77  |
| Suppression of tumorigenicity 5                           | U15131    |       | -1,89 | 2,66  |       |
| Peroxisomal biogenesis factor epsilon                     | U19721    |       | -2,24 | 1,76  |       |
| Chemokine (C-X3-C motif) receptor 1 (CX3CR1)              | U20350    |       |       | -1,84 | 1,24  |
| Transcriptional repressor (CTCF)                          | U25435    | -1,92 | 1,55  |       |       |
| Uncoupling protein 1 (mitochondrial, proton carrier)      | U28480    |       |       | -2,36 | 0,77  |
| High-mobility group phosphoprotein isoform I-C gene       | U28754    |       |       | -2,10 | 0,91  |
| erv1-like growth factor                                   | U31176    | -1,87 | 2,32  |       |       |
| E74-like factor 4 (ets domain transcription factor)       | U32645    |       | -2,23 | 0,59  | -1,98 |
| Signaling lymphocytic activation molecule family member 2 | U33017    |       | -1,90 | 2,97  |       |
| Integrin-linked kinase-2                                  | U40282    |       | -1,98 | 3,45  |       |
| Cytochrome P450, family 51, subfamily A, polypeptide 1    | U51684    |       |       | -1,91 | 0,91  |
| Embigin homolog                                           | U52054    |       |       | -1,82 | 1,55  |
| Chromosome Xq28                                           | U52112    |       |       | -2,53 | 2,25  |
| Putative transcriptional regulator ENX-1                  | U52965    | -1,82 | 2,99  |       |       |
| Solute carrier family 1, member 5                         | U53347    | -1,91 | 2,49  |       |       |
| Peroxisomal biogenesis factor epsilon                     | U56602    | -2,28 | 0,51  | -2,43 | 0,59  |
| Chemokine (C-C motif) ligand 13 (CCL13)                   | U59808    |       |       | -1,94 | 1,06  |
| PTK6 protein tyrosine kinase epsilon                      | U61412    |       |       | -1,97 | 0,91  |
| Elastin (Williams syndrome region)                        | U62292    |       |       | -1,98 | 0,77  |
| Zinc finger protein 193                                   | U62392    |       | -1,89 | 2,89  |       |
| Deoxyuridine triphosphatase (DUT)                         | U62891    | -1,81 | 2,49  |       | -1,92 |
| Chemokine (C-C motif) ligand 20 (CCL20)                   | U64197    |       |       | -2,21 | 1,43  |
| Potassium inwardly-rectifying channel J1 (ROMK1)          | U65406    |       |       | -2,14 | 0,77  |
| Hermansky-Pudlak syndrome 1                               | U65676    |       |       | -1,89 | 3,75  |
| Ephrin-B3                                                 | U66406    |       |       | -1,89 | 1,42  |
| Ataxia telangiectasia mutated                             | U67093    |       | -1,81 | 4,75  |       |
| Aryl hydrocarbon receptor nuclear translocator-like 1     | U69202    | -1,89 | 1,27  |       |       |
| Zinc finger protein 32 (KOX 30)                           | U69645    |       |       | -1,86 | 1,66  |
| Potential transcriptional repressor NOT4H1                | U71267    | -2,31 | 3,23  |       | -2,14 |
| Cyclin-selective ubiquitin carrier                        | U73379    | -1,92 | 1,55  |       | 1,83  |
| RAB interacting factor                                    | U74324    |       |       | -1,95 | 1,08  |
| TBP-associated factor, RNA polymerase II 130kDa (TAF4)    | U75308    |       |       | -1,95 | 1,06  |
| Mitogen-activated protein kinase kinase kinase 1          | U77129    |       |       | -1,92 | 1,06  |
| Lipopolysaccharide-induced TNF factor 1                   | U77396    |       | -2,11 | 1,76  |       |
| Glutamate receptor, ionotropic, N-methyl D-aspartate 2C   | U77782    | -1,80 | 2,49  |       |       |

|                                                        |        |       |      |       |      |       |            |
|--------------------------------------------------------|--------|-------|------|-------|------|-------|------------|
| Collagenase, stromelysin and metalloelastase gene      | U78045 |       |      |       |      | -2,08 | 1,93       |
| Protein phosphatase 1D (PPMD1)                         | U78305 |       |      |       |      | -1,82 | 4,75       |
| GTF2H2, NAIP and SMN genes on chromosome 5q12-13       | U80017 |       |      |       |      | -2,03 | 3,79       |
| GTF2H2, NAIP and SMN genes on chromosome 5q12-13       | U80017 |       |      |       |      | -1,86 | 4,43       |
| Vesicle transport ARG2                                 | U82256 |       |      |       |      | -1,89 | 2,66       |
| CD5 antigen-like                                       | U82812 |       |      |       |      |       | -2,50 0,77 |
| Parathyroid hormone-responsive B1                      | U85995 |       |      |       |      |       | -1,85 1,06 |
| C4-sterol methyl oxidase homolog (DESP4                | U93162 | -1,85 | 3,23 |       |      |       |            |
| Zinc finger protein 230                                | U95044 |       |      |       |      |       | -1,90 0,91 |
| U1A snRNA                                              | V00590 |       |      |       |      |       | -2,31 0,77 |
| raf-1 serine/threonine protein kinase                  | X03484 | -2,03 | 0,51 | -1,82 | 4,43 |       |            |
| Cytochrome P450, family 11, subfamily A, polypeptide 1 | X05367 |       |      |       |      |       | -1,85 1,23 |
| Thyroglobulin                                          | X05615 | -1,85 | 2,32 |       |      |       |            |
| Growth hormone receptor                                | X06562 |       |      |       |      |       | -10,5 1,93 |
| Zinc finger protein 35                                 | X07289 |       |      |       |      |       | -1,82 1,24 |
| Eosinophil peroxidase                                  | X14346 |       |      |       |      |       | -1,84 1,42 |
| Eosinophil peroxidase                                  | X14346 | -1,82 | 3,56 |       |      |       |            |
| Interferon regulatory factor 1                         | X14454 |       |      |       |      |       | -1,80 1,24 |
| Chondroitin sulfate proteoglycan 2                     | X15998 |       |      |       |      |       | -1,83 1,55 |
| Cytochrome P450, family 4, subfamily B, polypeptide 1  | X16699 |       |      | -1,82 | 3,79 | -2,06 | 0,77       |
| Enolase 3 (beta, muscle)                               | X51957 |       |      |       |      |       | -2,02 0,77 |
| Myosin regulatory light chain MRCL3                    | X54304 |       |      |       |      | -2,75 | 0,59       |
| Inositol 1,4,5-trisphosphate 3-kinase A                | X54938 |       |      |       |      |       | -1,92 1,06 |
| TREB protein                                           | X55543 | -2,16 | 0,51 |       |      |       | -1,93 0,91 |
| Mannose receptor, C type 1                             | X55635 |       |      |       |      |       | -1,83 1,23 |
| U13 snRNA pseudogene U13.12A                           | X58061 | -2,22 | 4,95 |       |      |       | -2,88 0,77 |
| Translation elongation factor 1 beta 2                 | X60489 |       |      |       |      | -2,15 | 0,59       |
| Parvalbumin                                            | X63070 |       |      |       |      |       | -1,89 2,00 |
| WAP four-disulfide core domain 2                       | X63187 |       |      |       |      | -1,86 | 3,78       |
| Pentraxin-related gene, rapidly induced by IL-1 beta   | X63613 |       |      |       |      |       | -1,89 0,86 |
| Topoisomerase (DNA) II beta                            | X68060 |       |      |       |      | -2,05 | 1,98       |
| Adenosine A2b receptor                                 | X68487 |       |      |       |      |       | -1,88 1,08 |
| Utrophin (homologous to dystrophin)                    | X69086 |       |      |       |      | -2,06 | 2,07       |
| Myomesin 1                                             | X69090 |       |      |       |      |       | -2,18 0,77 |
| Transforming growth factor, alpha                      | X70340 |       |      |       |      | -3,00 | 3,45       |
| Protein phosphatase 2A, regulatory subunit B'          | X73478 | -1,96 | 1,55 |       |      |       | -2,31 4,50 |
| Keratin 20                                             | X73502 |       |      |       |      |       | -1,87 0,77 |
| Transcription elongation factor                        | X73534 |       |      |       |      |       | -2,06 0,77 |
| Protein phosphatase 1 gamma                            | X74008 | -2,02 | 1,55 |       |      |       |            |
| ATP-binding cassette, sub-family E                     | X74987 |       |      |       |      | -1,85 | 2,89       |
| Genomic YAC-end left arm of chromosome 15              | X75191 | -1,92 | 1,40 | -2,09 | 1,76 | -1,84 | 1,24       |
| Ketohexokinase                                         | X78678 | -2,87 | 4,06 |       |      |       | -2,36 3,75 |
| AU RNA binding protein/enoyl-CoA hydratase             | X79888 |       |      |       |      | -1,83 | 2,97       |
| Plakophilin 4                                          | X81889 |       |      |       |      | -1,93 | 2,07       |
| Death associated protein 3                             | X83544 | -1,94 | 0,51 |       |      |       |            |
| Sodium channel, nonvoltage-gated 1, gamma              | X87160 |       |      |       |      | -2,07 | 1,77       |
| Cathepsin C                                            | X87212 |       |      |       |      | -1,82 | 3,78       |
| Glucosidase I                                          | X87237 |       |      |       |      |       | -1,86 1,06 |
| FAT tumor suppressor homolog 1                         | X87241 |       |      |       |      |       | -1,81 1,43 |
| Titin                                                  | X90568 |       |      |       |      | -2,60 | 0,59       |
| Rabaptin, RAB GTPase binding effector protein 1        | X91141 |       |      |       |      | -1,81 | 4,43       |
| Transcription factor AP-2 beta                         | X95694 |       |      |       |      |       | -1,83 2,25 |
| Dombrock blood group (ART4)                            | X95826 |       |      |       |      |       | -1,88 1,43 |
| Cell division cycle 2, G1 to S and G2 to M             | Y00272 |       |      |       |      | -1,97 | 2,07       |
| PolyA binding protein                                  | Y00345 | -1,90 | 0,51 |       |      |       |            |
| Superoxide dismutase 2, mitochondria                   | Y00472 |       |      |       |      | -2,05 | 1,98       |
| Ras-like without CAAX 1                                | Y07566 |       |      |       |      | -2,75 | 1,76       |
| Uracil-DNA glycosylase                                 | Y09008 |       |      |       |      |       | -1,92 2,75 |
| Carboxylesterase 2 (intestine, liver                   | Y09616 |       |      |       |      |       | -1,87 4,50 |
| RNA terminal phosphate cyclase domain 1                | Y11651 | -1,84 | 1,55 |       |      |       | -2,02 0,77 |
| Phosphoinositide-3-kinase, class 2, alpha polypeptide  | Y13367 |       |      |       |      |       | -1,91 0,91 |
| Caveolin 3                                             | Y14747 |       |      |       |      |       | -1,87 2,25 |
| Cytochrome c oxidase subunit VIIb (CoxVIIb             | Z14244 | -1,89 | 2,32 |       |      |       |            |
| BCL2-like 1                                            | Z23115 |       |      |       |      |       | -1,87 1,24 |
| Poly(rC)-binding protein 1                             | Z29505 | -2,02 | 1,27 | -2,53 | 0,59 |       |            |
| General transcription factor IIH, polypeptide 2, 44kDa | Z30094 |       |      |       |      | -1,81 | 3,45       |
| Myeloid/lymphoid or mixed-lineage leukemia (ALL1       | Z69764 |       |      |       |      |       | -2,69 4,50 |

|                                                   |        |       |      |       |      |       |      |
|---------------------------------------------------|--------|-------|------|-------|------|-------|------|
| ATPase, Ca <sup>++</sup> transporting, ubiquitous | Z69881 |       |      | -1,92 | 2,66 | -1,95 | 0,86 |
| Incyte EST                                        | -      |       |      | -2,01 | 2,66 | -2,14 | 0,77 |
| Incyte EST                                        | -      | -2,32 | 0,51 |       |      | -2,04 | 0,77 |
| Incyte EST                                        | -      |       |      |       |      | -1,80 | 1,23 |
| Incyte EST                                        | -      |       |      |       |      | -1,95 | 1,06 |
| Incyte EST                                        | -      |       |      | -1,91 | 4,43 |       |      |

---

*Asterics indicate genes with an average signal intensity under 1.5 the average signal intensity of the background signal in non-MG adult*

**Table S3-A: List of genes located in the over-represented chromosomal regions in the thymus of MG patients.**  
 These regions were significantly over-represented using a  $\chi^2$  test.

| Region Name                                                  | GenBank   | Expression |
|--------------------------------------------------------------|-----------|------------|
| <b>Chromosome 1q21</b>                                       |           |            |
| Ig superfamily, member 4B                                    | AF062733  | MH         |
| Acidic nuclear phosphoprotein 32 family, member E            | AK025624  | ML SN      |
| S100 calcium-binding protein A4                              | AV713821  | MH ML SN   |
| Cathepsin S                                                  | BC002642  | ML SN      |
| CK2 interacting protein 1                                    | BC010149  | ML SN      |
| Myeloid cell leukemia sequence 1 (BCL2-related)              | BE408610  | MH         |
| Phosphatidylinositol 4-kinase, catalytic, beta polypeptide   | BG025389  | SN         |
| ALL1-fused gene from chromosome 1q                           | BG498770  | SN         |
| Kinesin family member 14                                     | D26361    | SN         |
| RAR-related orphan receptor C                                | U16997    | ML SN      |
| Interleukin 6 receptor                                       | X12830    | MH SN      |
| <b>Chromosome 1q32</b>                                       |           |            |
| Calcium channel, voltage-dependent, L type, alpha 1S subunit | AI417964  | MH ML      |
| Guanylate kinase 1                                           | BC006249  | ML         |
| Proline arginine-rich end leucine-rich repeat protein        | BE836107  | MH         |
| Complement component receptor 2 (CD21)                       | J03565    | MH         |
| ELK4, ETS-domain protein (SRF accessory protein 1)           | NM_021795 | MH         |
| Contactin 2 (axonal)                                         | X67734    | ML         |
| Plakophilin 1                                                | Z73678    | ML         |
| <b>Chromosome 2p12</b>                                       |           |            |
| Ig kappa constant                                            | AJ010442  | MH SN      |
| Ig kappa constant                                            | BC005332  | MH ML      |
| Nuclear DNA-binding protein                                  | BE857571  | SN         |
| Ig kappa chain variable region (IGKV gene)                   | M63438    | MH ML SN   |
| Ig kappa chain variable region (IGKV gene)                   | M63438    | MH ML SN   |
| Ig kappa constant                                            | S49006    | MH         |
| Ig kappa light chain                                         | Y14736    | MH SN      |
| Ig kappa chain V-IV region B17 precursor                     | Z46347    | MH ML SN   |
| <b>Chromosome 6p21</b>                                       |           |            |
| Chloride intracellular channel 1                             | AA291390  | ML SN      |
| Two pore domain K+ channel (TASK-2)                          | AF084830  | MH         |
| Ring finger protein 1                                        | AL576514  | ML SN      |
| BCL2-antagonist/killer 1                                     | AW276601  | SN         |
| Dimethylarginine dimethylaminohydrolase 2                    | BC001435  | SN         |
| TAP binding protein (tapasin)                                | BE394234  | ML SN      |
| MHC class II, DR alpha                                       | BF795929  | MH ML SN   |
| MHC class II, DO beta                                        | BG176768  | MH SN      |
| MHC class II, DQ beta 1                                      | BG619272  | MH ML SN   |
| Trinucleotide repeat containing 5                            | BG675987  | ML SN      |
| RD RNA binding protein                                       | L03411    | SN         |
| MHC class I, E (HLA-E)                                       | M21533    | ML SN      |
| MHC class I (HLA-B13)                                        | M24041    | SN         |
| MHC class II, DQ beta 1                                      | M24364    | MH ML SN   |
| MHC class II, DQ beta 1                                      | M24364    | ML SN      |
| MHC class II, DP alpha 1                                     | M27487    | ML SN      |
| MHC class II, DQ beta 1                                      | U83582    | ML SN      |
| TBP-associated factor, RNA polymerase II 28kDa (TAF11)       | W63567    | ML SN      |
| MHC class II, DQ alpha 2                                     | X00033    | MH SN      |
| MHC class II alpha chain gene DZ-alpha                       | X02882    | MH         |
| Complement component 2                                       | X04481    | MH         |
| <b>Chromosome 9q34</b>                                       |           |            |
| SH2-containing protein Nsp3                                  | AF124251  | SN         |
| Surfeit 5                                                    | AI884541  | ML SN      |
| Serologically defined colon cancer antigen 3                 | AK001296  | ML         |
| Surfeit 1                                                    | AL549808  | SN         |
| Mannosidase, alpha, class 1B, member 1                       | AL583481  | ML SN      |
| Dynamin 1                                                    | AW206374  | ML SN      |
| Bromodomain containing 3                                     | AW953714  | ML SN      |
| Formin binding protein 1                                     | BC009262  | ML SN      |
| Ubiquitin associated domain containing 1                     | BE892211  | SN         |
| TNF receptor-associated factor 2                             | BG677004  | ML         |
| Peptidase (mitochondrial processing) alpha                   | D21064    | SN         |
| Serologically defined colon cancer antigen 3                 | NM_006643 | ML         |
| Nucleoporin                                                  | X64228    | SN         |
| <b>Chromosome 14q32</b>                                      |           |            |
| SNC73 protein (Ig H alpha 1)                                 | AF067420  | MH SN      |
| Ig heavy constant mu                                         | AI634950  | MH ML SN   |
| KIAA0284 protein                                             | AK025023  | MH         |
| Serpin A3                                                    | BG567810  | MH         |
| Fibulin 5                                                    | AL570066  | SN         |
| T-cell leukemia/lymphoma 1A                                  | BG757974  | MH ML      |
| T-cell leukemia/lymphoma 1A                                  | BG760057  | MH ML SN   |
| Ig heavy constant mu                                         | BM008087  | MH ML SN   |
| Interferon, alpha-inducible protein 27 (ISG12)               | X67325    | SN         |
| Ig heavy chain variable region                               | Z98733    | MH ML SN   |
| <b>Chromosome 22q11</b>                                      |           |            |
| Ig lambda 1 variable region                                  | AF124182  | MH         |
| Clone KB1125A3 on chromosome 22q11.2                         | AP000350  | ML SN      |



|                                                             |           |    |    |    |
|-------------------------------------------------------------|-----------|----|----|----|
| Clone KB1440D3 on chromosome 22q11.2                        | AP000553  |    |    | SN |
| Ig lambda-like polypeptide 1, pre-B-cell specific           | AW898081  |    | ML | SN |
| ATPase, H+ transporting, lysosomal, V1 subunit E isoform 1  | BC004443  |    | ML | SN |
| Ubiquitin fusion degradation 1 like (yeast)                 | BC005087  |    | ML |    |
| Ig lambda joining 3                                         | BF338816  | MH |    | SN |
| Ig lambda locus                                             | M87790    |    |    | SN |
| Peptidylprolyl isomerase (cyclophilin)-like 2               | U37221    |    | ML |    |
| Ig lambda constant 2                                        | X57812    | MH | ML |    |
| Ig lambda constant 2                                        | X57812    | MH | ML |    |
| Ig lambda light chain                                       | Y14738    | MH | ML | SN |
| Ig lambda light chain                                       | Y14738    | MH | ML |    |
| <b>Chromosome 3p21</b>                                      |           |    |    |    |
| Arginine-rich, mutated in early stage tumors                | AA974308  | MH |    |    |
| Kelch-like 18                                               | AB018338  |    |    | SN |
| Chemokine (C-C motif) receptor 9 (CCR9)                     | AF145439  | MH |    |    |
| Dual specificity phosphatase 7                              | AI655015  |    | ML |    |
| PTK9L protein tyrosine kinase 9-like (A6-related protein)   | AL136773  | MH | ML |    |
| PX domain containing serine/threonine kinase                | AL137938  |    | ML |    |
| N-acetyltransferase 6                                       | AL576483  |    | ML |    |
| Hyaluronoglucosaminidase 1                                  | AL578077  |    | ML | SN |
| Ubiquinol-cytochrome c reductase core protein I             | AU148041  | MH |    |    |
| Mitogen-activated protein kinase-activated protein kinase 3 | BC001662  | MH | ML | SN |
| Huntingtin interacting protein B                            | BE735468  | MH |    |    |
| BRCA1 associated protein-1                                  | BG109611  | MH |    |    |
| Inosine monophosphate dehydrogenase 2                       | BI223795  |    | ML | SN |
| RNA binding motif protein 15B                               | BM021378  |    | ML | SN |
| Rho A proto-oncogene                                        | L09159    | MH |    | SN |
| Chemokine (C-C motif) receptor-like 2 (CCRL2)               | NM_003965 |    | ML |    |
| Chemokine (C-X3-C motif) receptor 1 (CX3CR1)                | U20350    |    |    | SN |
| Zinc finger protein 35                                      | X07289    |    |    | SN |
| Transcription elongation factor                             | X73534    |    |    | SN |

**Table S3-B: Classification of 168 genes up-regulated in MH patients.**

These genes were extracted by SAM with a False Discovery Rate<5% and a FC>1.8.

| <b>Biological process</b> | <b>GenBank</b> | <b>Name</b>                                               |
|---------------------------|----------------|-----------------------------------------------------------|
| <b>Function</b>           |                |                                                           |
| <b>Immune response</b>    |                |                                                           |
| B cell related            | AF208502       | Early B-cell transcription factor (EBF)                   |
| B cell related            | BC001609       | Linker for activation of B cells (LAB)                    |
| B cell related            | BG024663       | CD20 antigen (B-lymphocyte cell-surface antigen B1)       |
| B cell related            | BG754034       | Spi-B transcription factor (Spi-1/PU.1 related)           |
| B cell related            | BG759817       | CD79A antigen (Ig-associated alpha)                       |
| B cell related            | BG822701       | CD44 antigen                                              |
| B cell related            | J03565         | Complement component receptor 2 (CD21)                    |
| B cell related            | M27394         | CD20 antigen (B-lymphocyte cell-surface antigen B1)       |
| B cell related            | M31732         | B-cell CLL/lymphoma 3                                     |
| B cell related            | M80461         | CD79B antigen (Ig-associated beta)                        |
| B cell related            | M80461         | CD79B antigen (Ig-associated beta)                        |
| B cell related            | M84371         | CD19 antigen                                              |
| B cell related            | X66079         | Spi-B transcription factor (Spi-1/PU.1 related)           |
| Chemokine                 | AF044197       | Chemokine (C-X-C motif) ligand 13 (CXCL13)                |
| Chemokine                 | BI837774       | Chemokine (C-C motif) ligand 21 (CCL21)                   |
| Chemokine                 | M25315         | Chemokine (C-C motif) ligand 3 (CCL3)                     |
| Complement component      | K02765         | Complement component 3                                    |
| Complement component      | X04481         | Complement component 2                                    |
| IFN induced               | AA034349       | Interferon-induced protein 44                             |
| IFN induced               | AA477235       | Myxovirus resistance 1 (interferon-inducible protein p78) |
| IFN induced               | AF024714       | Interferon-inducible protein (AIM2)                       |
| IFN induced               | AL582281       | 2',5'-oligoadenylate synthetase 1                         |
| IFN induced               | AW964220       | Interferon consensus sequence binding protein 1           |
| IFN induced               | BC000562       | 2',5'-oligoadenylate synthetase 1                         |
| IFN induced               | J04164         | Interferon-inducible protein (9-27)                       |
| IFN induced               | M24594         | Interferon-induced protein with tetratricopeptide repeats |
| IFN induced               | NM_002053      | Guanylate binding protein 1 (interferon-inducible)        |
| IFN induced               | X82200         | Stat50                                                    |
| Ig family                 | AF062733       | Ig superfamily, member 4B                                 |
| Ig family                 | AF067420       | SNC73 protein (Ig H alpha 1)                              |
| Ig family                 | AF124182       | Ig Lambda 1 variable region                               |
| Ig family                 | AI634950       | Ig heavy constant mu                                      |
| Ig family                 | AJ010442       | Ig kappa constant                                         |
| Ig family                 | BC005332       | Ig kappa constant                                         |
| Ig family                 | BF338816       | Ig lambda joining 3                                       |
| Ig family                 | BM008087       | Ig heavy constant mu                                      |
| Ig family                 | D87023         | Ig lambda                                                 |
| Ig family                 | M63438         | Ig kappa chain variable region (IGKV gene)                |
| Ig family                 | M63438         | Ig kappa chain variable region (IGKV gene)                |
| Ig family                 | S49006         | Ig kappa constant                                         |
| Ig family                 | S50732         | Ig kappa chain V-IV region B17 precursor                  |
| Ig family                 | X51985         | Lymphocyte-activation gene 3                              |
| Ig family                 | X51985         | Lymphocyte-activation gene 3                              |
| Ig family                 | X57812         | Ig lambda constant 2                                      |
| Ig family                 | X57812         | Ig lambda constant 2                                      |
| Ig family                 | Y14736         | Ig kappa light chain                                      |
| Ig family                 | Y14738         | Ig lambda light chain                                     |
| Ig family                 | Y14738         | Ig lambda light chain                                     |
| Ig family                 | Z46347         | Ig kappa chain V-IV region B17 precursor                  |
| Ig family                 | Z98733         | Ig heavy chain variable region                            |
| Kinase activity           | AF019562       | TYRO protein tyrosine kinase binding protein (DAP12)      |
| MHC class II              | AL543515       | CD74 antigen (MHC class II antigen-associated)            |
| MHC class II              | BF795929       | MHC class II, DR alpha                                    |
| MHC class II              | BG176768       | MHC class II, DO beta                                     |
| MHC class II              | BG619272       | MHC class II, DQ beta 1                                   |
| MHC class II              | M24364         | MHC class II, lymphocyte antigen DQB                      |
| MHC class II              | X00033         | MHC class II, DQ alpha 2                                  |
| MHC class II              | X02882         | MHC class II alpha chain gene DZ-alpha                    |
| Receptor activity         | AF296673       | Toll-like receptor 10                                     |
| Receptor activity         | AK027618       | Neurogenic locus notch homolog protein 4 precursor        |
| Receptor activity         | U63963         | CSF-1 receptor (FMS)                                      |
| Receptor activity         | X12830         | Interleukin 6 receptor                                    |
| Unclassified              | NM_004262      | Airway trypsin-like protease                              |
| Unclassified              | S69115         | Natural killer cell group 7 sequence                      |
| Unclassified              | U10267         | Defensin-related pseudogene sequence                      |

### Cellular metabolism

|                       |           |                                                          |
|-----------------------|-----------|----------------------------------------------------------|
| Nucleotide metabolism | AB023420  | Heat shock 70kDa protein 4                               |
| Nucleotide metabolism | AL535356  | Ribosomal protein S7                                     |
| Nucleotide metabolism | BG252637  | Prostatic binding protein                                |
| Nucleotide metabolism | BI259616  | Uracil-DNA glycosylase 2                                 |
| Nucleotide metabolism | NM_005058 | RNA binding motif protein, Y-linked, family 1, member A1 |
| Nucleotide metabolism | U04953    | Isoleucyl-tRNA synthetase                                |
| p53 pathway           | AB036063  | Ribonucleotide reductase M2 B (TP53 inducible)           |
| p53 pathway           | D86983    | Melanoma associated gene                                 |
| p53 pathway           | L13698    | Growth arrest-specific gene-1                            |
| Protease              | AL541945  | Serine proteinase inhibitor, clade F, member 1           |
| Protease              | BE148534  | Serpin B13                                               |
| Protease              | BG567810  | Serpin A3                                                |
| Protease              | BI520001  | Procollagen C-endopeptidase enhance                      |
| Protein processing    | AF070618  | Mitochondrial 28S ribosomal protein S22                  |
| Protein processing    | AI590087  | HERPUD1                                                  |
| Protein processing    | BG576390  | Hermansky-Pudlak syndrome (HPS1)                         |
| Protein processing    | L43494    | Sialyltransferase 8A                                     |
| Transporter activity  | AA057813  | Lectin, mannose-binding, 1                               |
| Transporter activity  | AF085224  | Solute carrier family 21, member 3                       |
| Transporter activity  | BF026359  | Carnitine palmitoyltransferase II                        |
| Transporter activity  | J04127    | Cytochrome P450, subfamily XIX                           |
| Transporter activity  | NM_005073 | Solute carrier family 15, member 1                       |
| Transporter activity  | NM_006849 | Protein disulfide isomerase                              |
| Transporter activity  | U43944    | Breast cancer cytosolic NADP(+)-dependent malic enzyme   |
| Transporter activity  | X00129    | Retinol binding protein (RBP)                            |
| Transporter activity  | X90926    | CYP2D7-CYP2D6 intergenic region                          |
| Ubiquitine cycle      | AB020647  | F-box and leucine-rich repeat protein 7                  |
| Ubiquitine cycle      | AW270961  | Diubiquitin                                              |
| Ubiquitine cycle      | AW804509  | BRCA1 associated protein                                 |

### Transcription

|                               |           |                                                      |
|-------------------------------|-----------|------------------------------------------------------|
| Transcription factor activity | AAC47282  | Sob protein (zinc finger protein)                    |
| Transcription factor activity | AF087940  | Heart and neural crest derivatives expressed 1       |
| Transcription factor activity | AI051628  | v-jun avian sarcoma virus 17 oncogene homolog        |
| Transcription factor activity | AK027071  | TGF beta 1 induced transcript 4                      |
| Transcription factor activity | AL549846  | TGF beta-induced factor                              |
| Transcription factor activity | AV747778  | v-fos FBJ murine osteosarcoma viral oncogene homolog |
| Transcription factor activity | BG757974  | T-cell leukemia/lymphoma 1A                          |
| Transcription factor activity | BG760057  | T-cell leukemia/lymphoma 1A                          |
| Transcription factor activity | D31716    | Basic transcription element binding protein 1        |
| Transcription factor activity | L49169    | FBJ murine osteosarcoma viral oncogene homolog E     |
| Transcription factor activity | M92844    | Zinc finger transcriptional regulator (GOS24) gene   |
| Transcription factor activity | M92844    | Zinc finger transcriptional regulator (GOS24) gene   |
| Transcription factor activity | NM_003451 | Zinc finger protein 177                              |
| Transcription factor activity | NM_021795 | ELK4, ETS-domain protein (SRF accessory protein 1)   |
| Transcription factor activity | U20734    | Transcription factor junB (junB)                     |
| Transcription factor activity | X63741    | Early growth response 3                              |
| Transcriptional regulation    | AJ000052  | Splicing factor SF1 (ZNF162)                         |
| Transcriptional regulation    | BF305705  | Histone deacetylase 5                                |
| Transcriptional regulation    | M96684    | Purine-rich element binding protein A                |
| Transcriptional regulation    | R56503    | SWI/SNF complex, subfamily a, member 2               |
| Transcriptional regulation    | U66615    | SWI/SNF complex subfamily c, member 1                |

### Cell communication

|                   |           |                                                              |
|-------------------|-----------|--------------------------------------------------------------|
| Cell adhesion     | AU124258  | Desmoglein 2                                                 |
| Cell adhesion     | BE836107  | Proline arginine-rich end leucine-rich repeat protein        |
| Cell adhesion     | S80335    | Integrin beta 7 subunit                                      |
| Channel           | AF084830  | Two pore domain K+ channel (TASK-2)                          |
| Channel           | AF177940  | Ion channel homolog (IWU1)                                   |
| Channel           | AI417964  | Calcium channel, voltage-dependent, L type, alpha 1S subunit |
| Channel           | AW162513  | Potassium voltage-gated channel, subfamily G, member 7       |
| Channel           | U72245    | Phospholemman chloride channel                               |
| Channel           | U95367    | Gamma-aminobutyric acid (GABA) A receptor, pi subunit        |
| Ligand            | AL547439  | Connective tissue growth factor                              |
| Ligand            | AW513199  | Corticotropin releasing hormone                              |
| Ligand            | BF980737  | Glucagon                                                     |
| Ligand            | U08137    | Fas ligand                                                   |
| Receptor activity | AF284095  | Alpha-2A adrenergic receptor                                 |
| Receptor activity | BG325212  | Insulin-like growth factor 2 receptor                        |
| Receptor activity | D38081    | Thromboxane A2 receptor                                      |
| Receptor activity | NM_000677 | Adenosine A3 receptor                                        |
| Receptor activity | NM_004835 | Angiotensin receptor 1                                       |
| Receptor activity | U86282    | Olfactory receptor (OR7-86) pseudogene                       |

|                                |          |                                                          |
|--------------------------------|----------|----------------------------------------------------------|
| Receptor activity              | X63128   | Activin A receptor, type II                              |
| <b>Intracellular signaling</b> |          |                                                          |
| Calcium binding protein        | AV713821 | S100 calcium-binding protein A4                          |
| Calcium binding protein        | BC009846 | Hippocalcin-like 1                                       |
| Channel                        | BE408610 | Myeloid cell leukemia sequence 1 (BCL2-related)          |
| Cytoskeleton                   | AB006629 | Cytoplasmic linker 2                                     |
| Cytoskeleton                   | AL137287 | Myosin IXA                                               |
| Cytoskeleton                   | BAA85657 | Cytokeratin (type II)                                    |
| Cytoskeleton                   | BF799654 | Erythrocyte membrane protein band 4.1-like 2             |
| GTPase activity                | AF235022 | Rab-related GTP-binding protein                          |
| GTPase activity                | AK022147 | TBC1 domain family, member 15                            |
| GTPase activity                | D29642   | Rho GTPase activating protein 2                          |
| Kinase activity                | AF169035 | Serum/glucocorticoid regulated kinase family, member 3   |
| Kinase activity                | BG108304 | v-src-1 Yamaguchi sarcoma viral related oncogene homolog |
| Receptor activity              | AF173081 | LIN-7 homolog 1 (MALS-1)                                 |
| Receptor activity              | AI679737 | Epidermal growth factor receptor pathway substrate 3     |
| Receptor activity              | BF725116 | Plexin A3                                                |
| Receptor activity              | S57551   | Guanylate cyclase 2C                                     |
| Transporter activity           | AY038988 | Glutaredoxin 2                                           |
| Transporter activity           | BG613898 | Secretory carrier membrane protein 1                     |
| <b>Unknown</b>                 |          |                                                          |
| Unknown                        | AB002382 | KIAA0384 protein                                         |
| Unknown                        | AB023187 | Fibronectin type III domain containing 3                 |
| Unknown                        | AK021842 | FLJ25476 protein                                         |
| Unknown                        | AK025023 | KIAA0284 protein                                         |
| Unknown                        | AL050127 | Clone DKFZp586G021                                       |
| Unknown                        | AL136919 | Factor for adipocyte differentiation 158                 |
| Unknown                        | BAA24842 | KIAA0412 protein                                         |
| Unknown                        | BC008254 | Hypothetical protein LOC339803                           |
| Unknown                        | CAC21785 | Unnamed protein                                          |
| Unknown                        | M74089   | TB1 gene                                                 |
| Unknown                        | M96852   | GOS19-3 gene                                             |
| Unknown                        | X57398   | NODAL modulator 3                                        |
| Unknown                        | Z69892   | Clone ICRFp50711077                                      |
| Unknown                        | -        | Incyte EST                                               |
| Unknown                        | -        | Incyte EST                                               |

---

**Table S3-C: Classification of 228 genes down-regulated in MH patients.**

These genes were extracted by SAM with a False Discovery Rate<5% and a FC>1.8.

| <b>Biological process</b>  | <b>GenBank</b> | <b>Name</b>                                                        |
|----------------------------|----------------|--------------------------------------------------------------------|
| <b>Function</b>            |                |                                                                    |
| <b>Cellular metabolism</b> |                |                                                                    |
| ATP binding activity       | D29641         | Helicase SKI2W                                                     |
| ATP binding activity       | H82183         | ATPase, H <sup>+</sup> transporting, lysosomal 34kDa, V1 subunit C |
| ATP binding activity       | M25874         | ATPase, Ca <sup>++</sup> transporting, plasma membrane 4           |
| ATP binding activity       | U56602         | Peroxisomal biogenesis factor 6                                    |
| ATP biosynthesis           | AF087135       | ATP synthase, mitochondrial, F0 complex, subunit c                 |
| ATP biosynthesis           | AK026556       | ATP synthase, mitochondrial, epsilon chair                         |
| ATP biosynthesis           | BC012920       | Deoxynucleotidyltransferase termina                                |
| ATP biosynthesis           | BG030146       | ATP synthase, mitochondrial, subunit F6                            |
| ATP biosynthesis           | D50371         | ATP synthase, mitochondrial, F0 complex, subunit c                 |
| Cell cycle                 | AK021794       | Cyclin-dependent kinase inhibitor 2C                               |
| Cell cycle                 | BF593642       | Cyclin C                                                           |
| Cell cycle                 | BF696386       | RAD21 homolog                                                      |
| Cell cycle                 | BG165160       | Cyclin I                                                           |
| Cell cycle                 | BG676784       | CDK2-associated protein 1                                          |
| Cell cycle                 | D38553         | Condensin complex subunit 2                                        |
| Cell cycle                 | D86958         | RB1-inducible coiled-coil 1                                        |
| Cell cycle                 | NM_001262      | Cyclin-dependent kinase inhibitor 2C                               |
| Channel                    | AK023366       | Two pore segment channel 2                                         |
| Kinase activity            | NM_000476      | Adenylate kinase 1                                                 |
| Kinase activity            | X78678         | Ketohexokinase                                                     |
| Nucleotide metabolism      | AB002390       | Ectonucleoside triphosphate diphosphohydrolase 4                   |
| Nucleotide metabolism      | AL117452       | Formyltetrahydrofolate synthetase domain containing 7              |
| Nucleotide metabolism      | BC000250       | Non-metastatic cells 3                                             |
| Nucleotide metabolism      | BC009999       | MUS81 endonuclease homolog                                         |
| Nucleotide metabolism      | BE818955       | Hypothetical protein HT036                                         |
| Nucleotide metabolism      | M29971         | 6-O-methylguanine-DNA methyltransferase                            |
| Nucleotide metabolism      | U62891         | Deoxyuridine triphosphatase (DUT)                                  |
| Protease                   | AI031979       | Cathepsin D (lysosomal aspartyl protease)                          |
| Protease                   | BI771158       | Calpain 2 (large subunit)                                          |
| Protease                   | M80482         | Subtilisin-like protein (PACE4)                                    |
| Protein processing         | AF087660       | NADH:ubiquinone oxidoreductase SDAP subunit 1                      |
| Protein processing         | AF110647       | Signal sequence receptor, gamma 2                                  |
| Protein processing         | AK023253       | DnaJ (Hsp40) homolog, subfamily B, member 5                        |
| Protein processing         | AK024258       | HBS1-like                                                          |
| Protein processing         | AK025674       | Coronin 7                                                          |
| Protein processing         | AL136925       | Adaptor-related protein complex 2, alpha 1 subunit                 |
| Protein processing         | AL521761       | Prefoldin 1                                                        |
| Protein processing         | AV650019       | Ribosomal protein S7                                               |
| Protein processing         | BC001687       | Asparaginyl-tRNA synthetase                                        |
| Protein processing         | BC008419       | Eukaryotic translation initiation factor 3, subunit 6              |
| Protein processing         | BC009454       | Chaperonin containing TCP1, subunit 5 (epsilon)                    |
| Protein processing         | BC010952       | Protease inhibitor 3, skin-derived (SKALP)                         |
| Protein processing         | BE892769       | Phenylalanine-tRNA synthetase-like                                 |
| Protein processing         | BF477523       | Carbohydrate sulfotransferase 2                                    |
| Protein processing         | BF796127       | Vacuolar protein sorting 45B                                       |
| Protein processing         | D52096         | Ribosomal protein S21                                              |
| Protein processing         | L34600         | Mitochondrial translational initiation factor 2                    |
| Protein processing         | M75715         | Translation termination factor 1                                   |
| Protein processing         | U04313         | Maspin                                                             |
| Ribosome biogenesis        | AL526336       | EBNA1-binding protein 2                                            |
| Ribosome biogenesis        | BG999341       | C2f protein                                                        |
| RNA binding                | AI392730       | Formin binding protein 21                                          |
| RNA binding                | AL050405       | RNA binding motif protein, X-linked 2                              |
| RNA binding                | BC003394       | Heterogeneous nuclear ribonucleoprotein C (C1/C2)                  |
| RNA binding                | BC004181       | RNA binding motif protein 10                                       |
| RNA binding                | BE501622       | Small nuclear ribonucleoprotein polypeptide A                      |
| RNA binding                | BG110237       | Small nuclear ribonucleoprotein polypeptide C                      |
| RNA binding                | BG436654       | U3 snoRNP protein 4 homolog                                        |
| RNA binding                | X58061         | U13 snRNA pseudogene U13.12A                                       |
| RNA binding                | Y00345         | PolyA binding protein                                              |
| RNA binding                | Y11651         | RNA terminal phosphate cyclase domain 1                            |
| RNA binding                | Z29505         | Poly(rC)-binding protein 1                                         |
| Transporter activity       | AF176008       | Mitochondrial carrier homolog 2                                    |
| Transporter activity       | AI207655       | Retinol-binding protein 4, plasma                                  |
| Transporter activity       | AI565092       | Solute carrier family 16, member 1                                 |

|                      |          |                                                         |
|----------------------|----------|---------------------------------------------------------|
| Transporter activity | AK022828 | * Solute carrier family 25, member 12                   |
| Transporter activity | AK025307 | * Carnitine palmitoyltransferase 1A (liver)             |
| Transporter activity | AU148041 | Ubiquinol-cytochrome c reductase core protein           |
| Transporter activity | AV647700 | NADH dehydrogenase 1 alpha subcomplex :                 |
| Transporter activity | AV764305 | Cytochrome c oxidase subunit VIIa polypeptide 2 (liver) |
| Transporter activity | BC000484 | Ubiquinol-cytochrome c reductase core protein I         |
| Transporter activity | BC004980 | Solute carrier family 25, member 1                      |
| Transporter activity | BC005304 | Glutaredoxin (thioltransferase)                         |
| Transporter activity | BE275227 | Thioredoxin-like 4A                                     |
| Transporter activity | BG036398 | Glycoprotein, synaptic 2                                |
| Transporter activity | BI861005 | Cytochrome c oxidase subunit Vic (COX6C)                |
| Transporter activity | D87969   | CMP-sialic acid transporter                             |
| Transporter activity | L34820   | Aldehyde dehydrogenase 5 family, member A'              |
| Transporter activity | U53347   | Solute carrier family 1, member 5                       |
| Transporter activity | Z14244   | Cytochrome c oxidase subunit VIIb (CoxVIIb)             |
| Ubiquitin cycle      | AB014595 | Cullin 4B                                               |
| Ubiquitin cycle      | AJ010347 | RING-H2 protein RNF6, alternative exon 1t               |
| Ubiquitin cycle      | AL136812 | Makorin 1                                               |
| Ubiquitin cycle      | BG109611 | BRCA1 associated protein-1                              |
| Ubiquitin cycle      | D29956   | Ubiquitin specific protease 8                           |
| Ubiquitin cycle      | U73379   | Cyclin-selective ubiquitin carrier                      |
| Unclassified         | AF017445 | Fucose-1-phosphate guanylyltransferase                  |
| Unclassified         | AF027156 | Mannosidase, alpha, class 1A, member 2                  |
| Unclassified         | AF326591 | * Plasmalemma vesicle associated protein                |
| Unclassified         | BC001270 | SH3-domain GRB2-like 1                                  |
| Unclassified         | D32063   | 2-oxoglutarate dehydrogenase                            |
| Unclassified         | M28228   | Calpastatin                                             |
| Unclassified         | U93162   | C4-sterol methyl oxidase homolog (DESP4)                |

### Transcription

|                               |           |                                                        |
|-------------------------------|-----------|--------------------------------------------------------|
| Transcription factor activity | AAB32671  | Pax-6                                                  |
| Transcription factor activity | AAC69892  | Bing1                                                  |
| Transcription factor activity | AB007885  | Zinc finger protein 262                                |
| Transcription factor activity | AB011102  | Zinc finger protein 292                                |
| Transcription factor activity | AB058750  | Zinc finger, CCCH-type with G patch domain             |
| Transcription factor activity | AF114156  | Y-linked zinc finger protein (ZFY)                     |
| Transcription factor activity | AF230388  | Tripartite motif-containing 29                         |
| Transcription factor activity | AF327722  | NMDA receptor regulated 1                              |
| Transcription factor activity | AJ224901  | Zinc finger protein 198                                |
| Transcription factor activity | AK027834  | Zinc finger protein 585B                               |
| Transcription factor activity | AU134033  | Forkhead box O3A                                       |
| Transcription factor activity | AW963298  | Runt-related transcription factor 1                    |
| Transcription factor activity | BG387620  | v-myb avian myeloblastosis viral oncogene homolog      |
| Transcription factor activity | L05912    | cAMP responsive element binding protein 4              |
| Transcription factor activity | M80627    | Transcription factor 12                                |
| Transcription factor activity | U09414    | Zinc finger protein 137                                |
| Transcriptional regulation    | AB002331  | Death associated transcription factor 1                |
| Transcriptional regulation    | AF059650  | Histone deacetylase 3 (HDAC3)                          |
| Transcriptional regulation    | AF086127  | Hypothetical protein FLJ31295                          |
| Transcriptional regulation    | AF168418  | Activating signal cointegrator 1                       |
| Transcriptional regulation    | AF315591  | Pumilio 2 (PUMH2)                                      |
| Transcriptional regulation    | AK022003  | TBP-associated factor, RNA polymerase II 68kDa (TAF15) |
| Transcriptional regulation    | BC003385  | Speckle-type POZ protein                               |
| Transcriptional regulation    | BC004227  | Metastasis associated 1 family, member 3               |
| Transcriptional regulation    | BE254018  | SWI/SNF related protein, subfamily d, member 2         |
| Transcriptional regulation    | BE740238  | Thyroid hormone receptor interactor 4                  |
| Transcriptional regulation    | M23613    | Nucleophosmin                                          |
| Transcriptional regulation    | NM_003935 | Topoisomerase (DNA) III beta                           |
| Transcriptional regulation    | U25435    | Transcriptional repressor (CTCF)                       |
| Transcriptional regulation    | U52965    | Putative transcriptional regulator ENX-1               |
| Transcriptional regulation    | U69202    | Aryl hydrocarbon receptor nuclear translocator-like    |
| Transcriptional regulation    | U71267    | Potential transcriptional repressor NOT4H4             |
| Transcriptional regulation    | X55543    | TREB protein                                           |

### Intracellular signaling

|              |          |                                                           |
|--------------|----------|-----------------------------------------------------------|
| Cytoskeleton | AF317696 | Actin cross-linking factor                                |
| Cytoskeleton | AI583424 | CLIP-associating protein 2                                |
| Cytoskeleton | AK000160 | Myosin IB                                                 |
| Cytoskeleton | AL136773 | PTK9L protein tyrosine kinase 9-like (A6-related protein) |
| Cytoskeleton | AL162078 | Kinesin-like 8                                            |
| Cytoskeleton | BC006141 | Erythrocyte membrane protein band 4.1-like 3              |
| Cytoskeleton | BC008881 | Kinesin 2 60/70kDa                                        |
| Cytoskeleton | BE644769 | Kinesin family member 14                                  |
| Cytoskeleton | BG034829 | WD repeat domain 1                                        |

|                      |           |                                                             |
|----------------------|-----------|-------------------------------------------------------------|
| Cytoskeleton         | M69225    | Dystonin                                                    |
| GTPase activity      | AF037195  | Regulator of G-protein signalling 14                        |
| GTPase activity      | AK025816  | Rho-guanine nucleotide exchange facto                       |
| GTPase activity      | AK027730  | RAB2B, member RAS oncogene family                           |
| GTPase activity      | D42087    | RAB21, member RAS oncogene family                           |
| GTPase activity      | D84488    | RAB7, member RAS oncogene family-like 1                     |
| GTPase activity      | L09159    | Rho A proto-oncogene                                        |
| Kinase activity      | AL080111  | NIMA-related kinase 7                                       |
| Kinase activity      | BC001662  | Mitogen-activated protein kinase-activated protein kinase : |
| Kinase activity      | BG391140  | c-src tyrosine kinase                                       |
| Kinase activity      | L34075    | FKBP-rapamycin associated protein (FRAP)                    |
| Kinase activity      | NM_002750 | Stress-activated protein kinase JNK1                        |
| Kinase activity      | X03484    | raf-1 serine/threonine protein kinase                       |
| Phosphatase activity | AA281524  | Protein tyrosine phosphatase, receptor type, M              |
| Phosphatase activity | AW131816  | Phosphatidic acid phosphatase type 2E                       |
| Phosphatase activity | BC001095  | Protein phosphatase 2, regulatory subunit B, delta isoform  |
| Phosphatase activity | X73478    | Protein phosphatase 2A, regulatory subunit B'               |
| Phosphatase activity | X74008    | Protein phosphatase 1 gamma                                 |
| Protein interactions | AF176555  | A-kinase anchoring protein 220                              |
| Protein interactions | BC009241  | TRK-fused gene                                              |
| Protein interactions | BC012186  | PDZ domain containing 8                                     |
| Receptor activity    | AF072693  | G-protein-coupled receptor 75 (GPR75)                       |
| Receptor activity    | AW020536  | Thyroid hormone receptor coactivating protein               |
| Receptor activity    | L25931    | Lamin B receptor                                            |

#### **Immune response**

|                            |           |                                                       |
|----------------------------|-----------|-------------------------------------------------------|
| Autoantigen                | AK023116  | Highly similar to human Sp140 protein                 |
| Autoantigen                | NM_006029 | Paraneoplastic antigen MA1                            |
| Cell adhesion              | AF132209  | Proteoglycan 3                                        |
| Cell adhesion              | AV762515  | Integrin, alpha E (antigen CD103)                     |
| Cell adhesion              | AW577907  | Intercellular adhesion molecule 2                     |
| Cell adhesion              | BG770327  | Galectin 3                                            |
| Complement component       | BF338113  | Complement component 4B                               |
| Cytoskeleton               | M34426    | L-plastin                                             |
| IFN signaling              | L42237    | Interferon receptor (IFNAR2)                          |
| IFN signaling              | X83544    | Death associated protein 3                            |
| Kinase activity            | AF153419  | IkappaBkinase complex-associated protein (IKBKAP)     |
| MHC "related"              | AI336342  | Thymocyte antigen CD1c                                |
| MHC "related"              | AK027789  | Source of immunodominant MHC-associated peptides      |
| MHC "related"              | AL050135  | Regulatory factor X, 5                                |
| MHC "related"              | BC008783  | HLA-B associated transcript 4                         |
| MHC "related"              | M28826    | Thymocyte antigen CD1c                                |
| MHC "related"              | M28827    | Thymocyte antigen CD1c                                |
| Protease                   | AI800750  | Protease, serine, 16 (thymus)                         |
| Protease                   | BG533465  | Secretory leukocyte protease inhibitor                |
| Protease                   | M16117    | Cathepsin G                                           |
| Receptor activity          | AF145439  | CCR9                                                  |
| RNA binding                | AF090093  | TIA1 cytotoxic granule-associated RNA binding protein |
| TCR signaling              | AF084941  | Pre-T-cell receptor alpha chain 1 precursor           |
| TCR signaling              | BI907465  | CD3D antigen, delta polypeptide (TiT3 complex)        |
| TCR signaling              | M12824    | CD8 antigen, alpha polypeptide                        |
| Transcriptional regulation | T27711    | B-cell CLL/lymphoma 6 (BCL 6A)                        |
| Transcriptional regulation | BC003070  | GATA-binding protein 3                                |
| Unclassified               | X14346    | Eosinophil peroxidase                                 |

#### **Unknown**

|         |          |                                              |
|---------|----------|----------------------------------------------|
| Unknown | AA974308 | Arginine-rich, mutated in early stage tumors |
| Unknown | AAH04632 | Ubx4 protein                                 |
| Unknown | AB020702 | KIAA0895 protein                             |
| Unknown | AB049838 | Clone QnpA-16545 (Macaca fascicularis brain) |
| Unknown | AF038199 | Clone 23728                                  |
| Unknown | AF168711 | X 010 protein                                |
| Unknown | AF281064 | CHMP1.5 protein                              |
| Unknown | AK024693 | Esophageal cancer associated protein         |
| Unknown | AK026058 | Hypothetical protein FLJ22405                |
| Unknown | AL137712 | Hypothetical protein LOC90499                |
| Unknown | AP001752 | Chromosome 21q, section 96/105               |
| Unknown | AP002850 | Clone KB87D5 on chromosome 8q23              |
| Unknown | BAB22510 | Putative protein                             |
| Unknown | BAB23743 | Putative protein                             |
| Unknown | BAB25981 | Putative protein                             |
| Unknown | BC006282 | Hypothetical protein MGC10540                |
| Unknown | BE735468 | Huntingtin interacting protein B             |
| Unknown | BG611120 | Hypothetical gene supported by BC055092      |

|         |           |                                           |
|---------|-----------|-------------------------------------------|
| Unknown | L78833    | BRCA1, Rho7, vat1 and ipf35 genes         |
| Unknown | M58285    | Hematopoietic protein 1                   |
| Unknown | NM_015686 | TED protein                               |
| Unknown | X75191    | Genomic YAC-end left arm of Chromosome 15 |
| Unknown | -         | Incyte EST                                |

**Cell communication**

|                 |          |                                                         |
|-----------------|----------|---------------------------------------------------------|
| Cell adhesion   | A1279608 | Claudin 7                                               |
| Cell adhesion   | AK027648 | Leucine proline-enriched proteoglycan (leprecan) *      |
| Cell adhesion   | BC009436 | Collagen alpha 1(I) chain precursor                     |
| Cell adhesion   | BC010160 | Claudin 15                                              |
| Cell adhesion   | J03202   | Laminin, gamma 1                                        |
| Channel         | BC001323 | TRPC4-associated protein (subfamily C)                  |
| Channel         | U77782   | Glutamate receptor, ionotropic, N-methyl D-aspartate 2C |
| Cytoskeleton    | AF000652 | Syntenin                                                |
| Cytoskeleton    | BC000654 | Keratin 8                                               |
| Cytoskeleton    | BC008807 | Keratin 6A                                              |
| Cytoskeleton    | BG620669 | Actin related protein 2/3 complex, subunit 3            |
| Cytoskeleton    | BG739723 | Keratin 5                                               |
| Cytoskeleton    | M94362   | Lamin B2                                                |
| GTPase activity | BC000136 | Similar to dynamin 1-like                               |
| Ligand          | AU120808 | Pleiotrophin                                            |
| Ligand          | BG740896 | Hepatoma-derived growth factor                          |
| Ligand          | U31176   | erv1-like growth factor                                 |
| Ligand          | X05615   | Thyroglobulin                                           |

---

*Asterics indicate genes with an average signal intensity under 1.5 the average signal intensity of the background signal in non-MG adults*



**Table S3-D: List of genes deregulated in SN compared to ML patients.**

These genes were obtained comparing the expression level of the 851 genes deregulated in SN compared to ML patients by the Mann-Whitney test.

| Name                                                  | GenBank   | FC    |         | Biological process               | Classification     |                               |
|-------------------------------------------------------|-----------|-------|---------|----------------------------------|--------------------|-------------------------------|
|                                                       |           | SN/ML | P-value |                                  | Molecular function |                               |
| <b>Up-regulated genes</b>                             |           |       |         |                                  |                    |                               |
| U2-associated SR140 protein                           | BC006474  | 2.44  | 0.0079  | Transcription                    |                    | Transcriptional regulation    |
| Interferon, alpha-inducible protein 27 (ISG12)        | X67325    | 2.06  | 0.0079  | Immune response-Defense response |                    | IFN induced                   |
| TYRO protein tyrosine kinase binding protein (DAP12)  | AF019562  | 2.03  | 0.0079  | Immune response-Defense response |                    | Kinase activity               |
| SON DNA binding protein                               | AW328025  | 1.89  | 0.0079  | Immune response-Defense response |                    | Transcriptional regulation    |
| Sine oculis homeobox homolog 1                        | X91868    | 1.86  | 0.0079  | Transcription                    |                    | Transcriptional regulation    |
| Clone KB1184D12 on chromosome 8q23                    | AP003351  | 1.81  | 0.0079  | Unknown                          |                    | Unknown                       |
| Possible morphine-related gene                        | AB056657  | 1.67  | 0.0079  | Unknown                          |                    | Unknown                       |
| Ral GEF with PH domain and SH3 binding motif 2        | AU119325  | 1.66  | 0.0079  | Intracellular signaling          |                    | GTPase activity               |
| Ectonucleoside triphosphate diphosphohydrolase 4      | BG742963  | 1.66  | 0.0079  | Cellular metabolism              |                    | Nucleotide metabolism         |
| Thymopoietin                                          | U09088    | 1.65  | 0.0079  | Intracellular signaling          |                    | Cytoskeleton                  |
| SNC73 protein (Ig H alpha 1)                          | AF067420  | 1.57  | 0.0079  | Immune response                  |                    | Ig family                     |
| MHC, class II, DP alpha 1                             | M27487    | 1.51  | 0.0079  | Immune response                  |                    | MHC class II                  |
| Translocation associated fusion protein IRTA1/IGA1    | BF663123  | 1.45  | 0.0079  | Immune response                  |                    | Receptor activity             |
| Calponin 3, acidic                                    | S80562    | 1.45  | 0.0079  | Intracellular signaling          |                    | Cytoskeleton                  |
| Phosphate cytidyltransferase 1, choline, alpha        | BG260122  | 1.41  | 0.0079  | Cellular metabolism              |                    | Lipid metabolism              |
| Metastasis associated 1 family, member 3              | BC004227  | 1.26  | 0.0079  | Transcription                    |                    | Transcription factor activity |
| Similar to Neuralized (Neu)                           | CAC36018  | 1.23  | 0.0079  | Unknown                          |                    | Unknown                       |
| Nardilysin (N-arginine dibasic convertase)            | BC008775  | 1.18  | 0.0079  | Cellular metabolism              |                    | Protein processing            |
| Annexin A5                                            | J03745    | 1.67  | 0.0159  | Intracellular signaling          |                    | Cytoskeleton                  |
| Cerebellar degeneration-related protein 1             | M16965    | 1.49  | 0.0159  | Intracellular signaling          |                    | Calcium binding protein       |
| Mitochondrial ribosomal protein L3                    | BG185576  | 1.45  | 0.0159  | Cellular metabolism              |                    | Protein processing            |
| E74-like factor 1 (ets domain transcription factor)   | M82882    | 1.41  | 0.0159  | Transcription                    |                    | Transcription factor activity |
| ATPase, Ca++ transporting, plasma membrane 4          | M25874    | 1.34  | 0.0159  | Cellular metabolism              |                    | Transporter activity          |
| SMAD, mothers against DPP homolog 4                   | U44378    | 1.70  | 0.0317  | Transcription                    |                    | Transcription factor activity |
| CD84 antigen (leukocyte antigen)                      | NM_003874 | 1.56  | 0.0317  | Immune response                  |                    | Ig family                     |
| Heat shock 22kDa protein 8 (E2IG1)                    | AF191017  | 1.52  | 0.0317  | Intracellular signaling          |                    | Kinase activity               |
| Ig heavy constant mu                                  | BM008087  | 1.52  | 0.0317  | Immune response                  |                    | Ig family                     |
| Chromosome 3p21.3, anti-oncogene region               | AP000500  | 1.51  | 0.0317  | Unknown                          |                    | Unknown                       |
| CD9 antigen                                           | X60111    | 1.48  | 0.0317  | Cell communication               |                    | Cell adhesion                 |
| Fibulin 5                                             | AL570066  | 1.43  | 0.0317  | Cell communication               |                    | Cell adhesion                 |
| Natural killer cell group 7 sequence                  | S69115    | 1.38  | 0.0317  | Immune response                  |                    | Unclassified                  |
| Nuclear protein SDK3                                  | Y10351    | 1.34  | 0.0317  | Intracellular signaling          |                    | Kinase activity               |
| H2A histone family, member Z                          | M37583    | 1.32  | 0.0317  | Transcription                    |                    | Unknown                       |
| Nucleoporin                                           | X64228    | 1.29  | 0.0317  | Intracellular signaling          |                    | Transporter activity          |
| Thioredoxin-like 4A                                   | BE275227  | 1.28  | 0.0317  | Cellular metabolism              |                    | Transporter activity          |
| Splicing factor, arginine/serine-rich 4               | BF855449  | 1.27  | 0.0317  | Cellular metabolism              |                    | Nucleotide metabolism         |
| Splicing factor, arginine/serine-rich 10              | BC000160  | 1.26  | 0.0317  | Cellular metabolism              |                    | Nucleotide metabolism         |
| Glutathione S-transferase omega 1                     | AF212303  | 1.25  | 0.0317  | Cellular metabolism              |                    | Transporter activity          |
| CSF-1 receptor (FMS)                                  | U63963    | 1.23  | 0.0317  | Immune response                  |                    | Receptor activity             |
| Death-inducing-protein                                | AW962464  | 1.18  | 0.0317  | Unknown                          |                    | Unknown                       |
| Myosin, heavy polypeptide 9, non-muscle               | BF304650  | 1.17  | 0.0317  | Intracellular signaling          |                    | Cytoskeleton                  |
| Methyltransferase like 3                              | BG287883  | 1.16  | 0.0317  | Cellular metabolism              |                    | Transporter activity          |
| <b>Down-regulated genes</b>                           |           |       |         |                                  |                    |                               |
| Uncoupling protein 1 (mitochondrial, proton carrier)  | U28480    | -1.95 | 0.0079  | Cellular metabolism              |                    | Transporter activity          |
| Kinesin family member 21A                             | AB051495  | -1.84 | 0.0079  | Intracellular signaling          |                    | Cytoskeleton                  |
| Gamma-aminobutyric acid (GABA) A receptor, alpha 6    | S81944    | -1.73 | 0.0079  | Cell communication               |                    | Channel                       |
| BCL2-like 1                                           | Z23115    | -1.71 | 0.0079  | Intracellular signaling          |                    | Protein interactions          |
| V-fos FBJ murine osteosarcoma viral oncogene homolog  | AV747778  | -1.69 | 0.0079  | Transcription                    |                    | Transcription factor activity |
| Zinc finger protein 334                               | AK001331  | -1.52 | 0.0079  | Transcription                    |                    | Transcription factor activity |
| RNA polymerase I transcription factor RRN3            | AA977114  | -1.51 | 0.0079  | Transcription                    |                    | Transcription factor activity |
| Histidine ammonia-lyase                               | D16626    | -1.50 | 0.0079  | Cellular metabolism              |                    | Protein processing            |
| Transcriptional enhancer factor (TEF1)                | M63896    | -1.44 | 0.0079  | Transcription                    |                    | Transcription factor activity |
| Chromosome 1q22-q23, CD1 region                       | AP002534  | -1.43 | 0.0079  | Unknown                          |                    | Unknown                       |
| Ankyrin repeat domain 7                               | AW780029  | -1.41 | 0.0079  | Intracellular signaling          |                    | Protein interactions          |
| NIMA-related kinase 7                                 | AL080111  | -1.40 | 0.0079  | Intracellular signaling          |                    | Kinase activity               |
| Zinc finger and BTB domain containing 26              | AB046792  | -1.39 | 0.0079  | Transcription                    |                    | Transcription factor activity |
| Unnamed protein                                       | BAB30477  | -1.33 | 0.0079  | Unknown                          |                    | Unknown                       |
| Nonmetastatic protein 23, homolog 5                   | AF067724  | -1.29 | 0.0079  | Cellular metabolism              |                    | Nucleotide metabolism         |
| Outer dense fiber protein (ODFPG)                     | M93132    | -1.29 | 0.0079  | Cell Motility                    |                    | Cytoskeleton                  |
| Zinc finger protein 35                                | X07289    | -1.27 | 0.0079  | Transcription                    |                    | Transcription factor activity |
| Beta-1,4-galactosyltransferase 5                      | BF229298  | -1.27 | 0.0079  | Cellular metabolism              |                    | Protein processing            |
| ATP-binding cassette, sub-family F, member 2          | BF982597  | -1.83 | 0.0159  | Cellular metabolism              |                    | Transporter activity          |
| Tetraspanin 6                                         | AI721194  | -1.69 | 0.0159  | Cell communication               |                    | Receptor activity             |
| Phosphatidic acid phosphatase type 2C                 | BC002806  | -1.67 | 0.0159  | Intracellular signaling          |                    | Phosphatase activity          |
| Basic transcription element binding protein 1         | D31716    | -1.64 | 0.0159  | Transcription                    |                    | Transcription factor activity |
| Stomatin                                              | BC010703  | -1.46 | 0.0159  | Intracellular signaling          |                    | Cytoskeleton                  |
| ST3 beta-galactoside alpha-2,3-sialyltransferase 1    | L29555    | -1.45 | 0.0159  | Cellular metabolism              |                    | Protein processing            |
| Arginine vasopressin receptor 1A                      | L25615    | -1.37 | 0.0159  | Cell communication               |                    | Receptor activity             |
| Clone QnpA-16545                                      | AB049838  | -1.34 | 0.0159  | Unknown                          |                    | Unknown                       |
| Membrane-bound transcription factor peptidase, site 1 | D42053    | -1.34 | 0.0159  | Cellular metabolism              |                    | Lipid metabolism              |
| Hypothetical protein LOC388928                        | AI685683  | -1.30 | 0.0159  | Unknown                          |                    | Unknown                       |
| LY6/PLAUR domain containing 1                         | AV727120  | -1.59 | 0.0317  | Intracellular signaling          |                    | Protein interactions          |
| Hypothetical protein LOC284591                        | AI130021  | -1.59 | 0.0317  | Unknown                          |                    | Unknown                       |
| Insulin-like growth factor I receptor gene            | M69229    | -1.54 | 0.0317  | Cell communication               |                    | Receptor activity             |
| F-box and WD-40 domain protein 5                      | AK026081  | -1.53 | 0.0317  | Cellular metabolism              |                    | Ubiquitin cycle               |
| Tensin                                                | AF225896  | -1.50 | 0.0317  | Intracellular signaling          |                    | Cytoskeleton                  |
| Ring finger protein 36                                | AL360161  | -1.48 | 0.0317  | Intracellular signaling          |                    | Protein interactions          |
| RNA terminal phosphate cyclase domain 1               | Y11651    | -1.48 | 0.0317  | Cellular metabolism              |                    | RNA binding                   |
| Olfactory receptor                                    | AAC64584  | -1.48 | 0.0317  | Cell communication               |                    | Receptor activity             |
| Autism susceptibility candidate 2                     | AK025298  | -1.47 | 0.0317  | Unknown                          |                    | Unknown                       |
| Similar to hypothetical protein LOC231503             | AK023055  | -1.45 | 0.0317  | Unknown                          |                    | Unknown                       |
| Prostaglandin E synthase                              | AI421214  | -1.45 | 0.0317  | Immune response                  |                    | Ligand                        |
| Chromosome 21 segment HS21C003                        | AL163203  | -1.41 | 0.0317  | Unknown                          |                    | Unknown                       |

|                                                                 |          |       |        |                         |                               |
|-----------------------------------------------------------------|----------|-------|--------|-------------------------|-------------------------------|
| Paternally expressed 3                                          | AF166122 | -1.35 | 0.0317 | Transcription           | Transcription factor activity |
| Glutamate receptor, ionotropic, kainate 5                       | S40369   | -1.35 | 0.0317 | Cell communication      | Channel                       |
| Ubiquitin-conjugating enzyme E2W (putative)                     | AK001873 | -1.31 | 0.0317 | Cellular metabolism     | Ubiquitin cycle               |
| Ig kappa chain variable region (IGKV gene)                      | M63438   | -1.30 | 0.0317 | Immune response         | Ig family                     |
| U1A snRNA                                                       | V00590   | -1.29 | 0.0317 | Cellular metabolism     | RNA binding                   |
| Protein phosphatase 2, regulatory subunit B, $\epsilon$ isoform | L76703   | -1.21 | 0.0317 | Intracellular signaling | Phosphatase activity          |
| Succinate dehydrogenase complex, subunit A                      | BC001380 | -1.19 | 0.0317 | Cellular metabolism     | Transporter activity          |
